# Supplementary material for: The extensive solid-form landscape of sulfathiazole: geometrical similarity and interaction energies
Source: Royal Society of Chemistry journal article supplement (doi:10.1039/d1ce01516h), 2021-12-15
Supplement: d1ce01516h3.pdf [file d1ce01516h3.pdf]

**The extensive solid-form landscape of sulfathiazole: geometrical similarity and interaction energies**

David S. Hughes, Ann L. Bingham, Michael B. Hursthouse, Terry L. Threlfall and Andrew D. Bond

**Electronic Supplementary Information**

|     |                                                                                          |
|-----|------------------------------------------------------------------------------------------|
| S1  | Summary of the multi-component sulfathiazole crystals                                    |
| S2  | Crystallographic information for the new crystal structures                              |
| S3  | Details of DFT-D minimisation                                                            |
| S4  | Molecular conformation and torsion angles                                                |
| S5  | <i>CrystalCMP</i>                                                                        |
| S6  | <i>COMPACT</i>                                                                           |
| S7  | <i>XPac</i>                                                                              |
| S8  | Unit-cell parameters for the largest isostructural group in the multi-component crystals |
| S9  | Pairwise <i>PIXEL</i> energies (kJ mol <sup>-1</sup> ) for the polymorphs                |
| S10 | Pairwise motifs in the polymorphs and multi-component structures                         |

## S1. Summary of the multi-component sulfathiazole crystals

### Co-crystals (total: 59)

|                                                                                     |                                                                                     |                                                                                     |                                                                                      |                                                                                       |
|-------------------------------------------------------------------------------------|-------------------------------------------------------------------------------------|-------------------------------------------------------------------------------------|--------------------------------------------------------------------------------------|---------------------------------------------------------------------------------------|
| 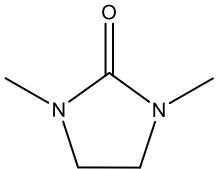   |    |    |    |    |
| <b>1</b>                                                                            | <b>2</b>                                                                            | <b>3</b>                                                                            | <b>4</b>                                                                             | <b>5</b>                                                                              |
|    |    |    |    |    |
| <b>6</b>                                                                            | <b>7</b>                                                                            | <b>8</b>                                                                            | <b>9</b>                                                                             | <b>10</b>                                                                             |
|    |    |    |    |    |
| <b>11</b>                                                                           | <b>12</b>                                                                           | <b>13</b>                                                                           | <b>14</b>                                                                            | <b>15</b>                                                                             |
|  |  |  |  |  |
| <b>16</b>                                                                           | <b>17</b>                                                                           | <b>18</b>                                                                           | <b>19</b>                                                                            | <b>20</b>                                                                             |
|  |  |  |  |  |
| <b>21</b>                                                                           | <b>22</b>                                                                           | <b>23</b>                                                                           | <b>24</b>                                                                            | <b>25</b>                                                                             |
|  |  |  |  |  |
| <b>26</b>                                                                           | <b>27</b>                                                                           | <b>28</b>                                                                           | <b>29</b>                                                                            | <b>30</b>                                                                             |

## S1. Summary of the multi-component sulfathiazole crystals

### Co-crystals (total: 59)

|                                                                                     |                                                                                     |                                                                                     |                                                                                      |                                                                                       |
|-------------------------------------------------------------------------------------|-------------------------------------------------------------------------------------|-------------------------------------------------------------------------------------|--------------------------------------------------------------------------------------|---------------------------------------------------------------------------------------|
| 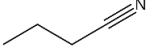   |    |    |    |    |
| <b>31</b>                                                                           | <b>32</b>                                                                           | <b>33</b>                                                                           | <b>34</b>                                                                            | <b>35</b>                                                                             |
|    |    |    |    |    |
| <b>36</b>                                                                           | <b>37</b>                                                                           | <b>38</b>                                                                           | <b>39</b>                                                                            | <b>40</b>                                                                             |
|   |   |   | $\text{CH}_3\text{—CN}$                                                              |   |
| <b>41</b>                                                                           | <b>42</b>                                                                           | <b>43</b>                                                                           | <b>44</b>                                                                            | <b>45</b>                                                                             |
|  |  | 18-CROWN-6<br>+<br>ACETONITRILE                                                     |  |  |
| <b>46</b>                                                                           | <b>47</b>                                                                           | <b>48</b>                                                                           | <b>49</b>                                                                            | <b>50</b>                                                                             |
|  | $\text{Me}_2\text{N—COMe}$                                                          |  |  |  |
| <b>51</b>                                                                           | <b>52</b>                                                                           | <b>53</b>                                                                           | <b>54</b>                                                                            | <b>55</b>                                                                             |
|  |  |  |  |                                                                                       |
| <b>56</b>                                                                           | <b>57</b>                                                                           | <b>58</b>                                                                           | <b>59</b>                                                                            |                                                                                       |

## S1. Summary of the multi-component sulfathiazole crystals

### Salts (total: 29)

|                                                                                     |                                                                                     |                                                                                     |                                                                                      |                                                                                       |
|-------------------------------------------------------------------------------------|-------------------------------------------------------------------------------------|-------------------------------------------------------------------------------------|--------------------------------------------------------------------------------------|---------------------------------------------------------------------------------------|
| 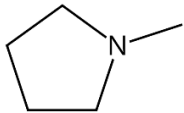   |    |    |    |    |
| <b>60</b>                                                                           | <b>61</b>                                                                           | <b>62</b>                                                                           | <b>63</b>                                                                            | <b>64</b>                                                                             |
|    |    |    |    |    |
| <b>65</b>                                                                           | <b>66</b>                                                                           | <b>67</b>                                                                           | <b>68</b>                                                                            | <b>69</b>                                                                             |
|    |    |    |    |   |
| <b>70</b>                                                                           | <b>71</b>                                                                           | <b>72</b>                                                                           | <b>73</b>                                                                            | <b>74</b>                                                                             |
|  |  |  |  |  |
| <b>75</b>                                                                           | <b>76</b>                                                                           | <b>77</b>                                                                           | <b>78</b>                                                                            | <b>79</b>                                                                             |
|  |  |  |  |  |
| <b>80</b>                                                                           | <b>81</b>                                                                           | <b>82</b>                                                                           | <b>83</b>                                                                            | <b>84</b>                                                                             |
|  |  |  |  |                                                                                       |
| <b>85</b>                                                                           | <b>86</b>                                                                           | <b>87</b>                                                                           | <b>88</b>                                                                            |                                                                                       |

## S1. Summary of the multi-component sulfathiazole crystals

### Other (total: 3)

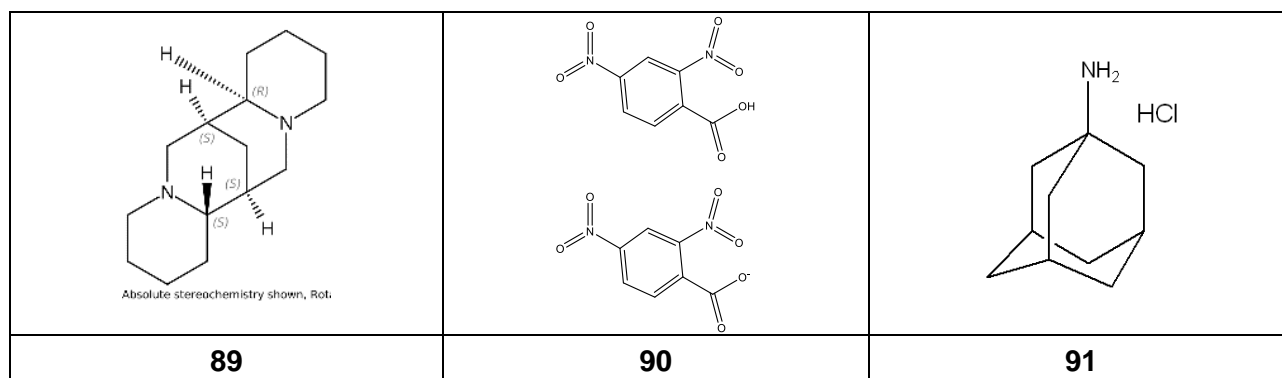

### Notes on the following table

- (i) **25**: the SLFZ positions approximate *Pbca* ( $Z' = 1$ ), but the *P212121* ( $Z' = 2$ ) description is retained in the structure set containing only SLFZ molecules for consistency with the full structure set.
- (ii) **35**: included in the DFT-optimised set in *P21* ( $Z' = 2$ ) to accommodate the azelanitrile molecules without disorder. The SLFZ molecules actually define *P21/n* ( $Z' = 1$ ) (used for refinement of the X-ray structure) and the *P21/n* structure is included in the structure set containing only SLFZ molecules.
- (iii) **41**: the SLFZ molecules approximate *P21/n* ( $Z' = 1$ ) with unit-cell parameters 8.559, 20.550, 9.673, 90, 96.13, 90 (comparable to **28–35**). The larger unit cell in *P21/c* ( $Z' = 2$ ) accommodates the N-cyanopyrrolidine molecules without disorder. The transformation matrix from the larger to smaller cell is  $[\frac{1}{2} \ 0 \ \frac{1}{2} / 0 \ -1 \ 0 / \frac{1}{2} \ 0 \ -\frac{1}{2}]$ . The larger *P21/c* ( $Z' = 2$ ) structure is included in the structure set containing only SLFZ molecules for consistency with the full structure set.
- (iv) **43**: ADEDIX02 is published in space group *P41*. This is converted to *P43* in the DFT-optimised set to produce the “R” conformation for SLFZ.
- (v) **52**: SOGSEO in the CSD has one H atom missing from SLFZ. The structure contains the  $R_2^2(8)$  H-bonded dimer, so it is clear that the missing H atom is attached to N13. The corrected structure is included in the DFT-optimised set.
- (vi) **85**: VEYRAZ is reported (correctly) in *C2/c*, but the structure is included in the DFT-optimised set in *Cc* ( $Z' = 2$ ) to accommodate  $[\text{SO}_4]^{2-} / \text{H}_2\text{O}$  without disorder. The higher symmetry *C2/c* ( $Z' = 1$ ) structure is included in the set containing only SLFZ molecules.
- (vii) **86**: VEYYEG is reported (correctly) as an average structure in *Pbcn* ( $Z' = 1$ ), but the symmetry is reduced to *Pna21* ( $Z' = 2$ ) (with a change of unit-cell setting) to accommodate the benzenesulfonate anions without disorder. The DFT-optimised structure shows some distortion from *Pbcn*, so the *Pna21* ( $Z' = 2$ ) structure is retained in both the DFT-optimised set and the set containing only SLFZ molecules.
- (viii) **87**: FIFWOJ is reported (incorrectly) in the CSD in space group *P-1* with  $Z' = 2$ . The space group is actually *P21/n* with  $Z' = 1$ . The *P21/n* version is included in the DFT-optimised set.
- (ix) **89**: the structure closely resembles *P21/c*, but the symmetry is broken by the non-centrosymmetric sparteine molecules. The *P21* version is retained in the structure set containing only SLFZ molecules for consistency with the full structure set.

## The extensive solid-form landscape of sulfathiazole: geometrical similarity and interaction energies

David S. Hughes, Ann L. Bingham, Michael B. Hursthouse, Terry L. Threlfall and Andrew D. Bond

### S1. Summary of the multi-component sulfathiazole crystals

#### Co-crystals (total: 59)

|                   | CSD Refcode | Space Group | Solvent                               | Partner                                         | Stoichiometry  | Cell dimensions |        |        |          |         |          | Z | V      |
|-------------------|-------------|-------------|---------------------------------------|-------------------------------------------------|----------------|-----------------|--------|--------|----------|---------|----------|---|--------|
|                   |             |             |                                       |                                                 |                | a               | b      | c      | $\alpha$ | $\beta$ | $\gamma$ |   |        |
| 1                 | 2120788     | P-1         | dimethylethyleneurea                  | C <sub>5</sub> H <sub>10</sub> N <sub>2</sub> O | 2:1            | 8.051           | 11.492 | 15.552 | 77.45    | 88.64   | 88.64    | 2 | 1403.9 |
| 2                 | 2120806     | P21         | cyclohexanol                          | C <sub>6</sub> H <sub>12</sub> O                | 1:1            | 8.541           | 12.401 | 8.836  | 90       | 102.96  | 90       | 2 | 912.0  |
| 3                 | 2120768     | Pc          | diethylmalonate                       | C <sub>7</sub> H <sub>12</sub> O <sub>4</sub>   | 2:1            | 8.409           | 16.640 | 11.274 | 90       | 101.37  | 90       | 2 | 1546.6 |
| 4                 | 2120769     | Cc          | N,N-dibutylformamide                  | C <sub>9</sub> H <sub>19</sub> NO               | 2:1            | 16.616          | 16.088 | 12.630 | 90       | 110.69  | 90       | 4 | 3158.5 |
| 5                 | 2120801     | P21/c       | acetone                               | C <sub>3</sub> H <sub>6</sub> O                 | 1:1            | 8.322           | 16.020 | 11.352 | 90       | 100.29  | 90       | 4 | 1489.1 |
| 6                 | 2120771     | P21/c       | diethyloxalate                        | C <sub>6</sub> H <sub>10</sub> O <sub>4</sub>   | 1:1            | 8.416           | 17.394 | 10.342 | 90       | 104.70  | 90       | 4 | 1464.4 |
| 7                 | 2120781     | P21/c       | $\gamma$ -butyrolactone               | C <sub>4</sub> H <sub>6</sub> O <sub>2</sub>    | 1:1            | 8.636           | 19.187 | 9.354  | 90       | 91.03   | 90       | 4 | 1549.7 |
| 8                 | 2120770     | P21/n       | $\alpha$ -Me- $\gamma$ -butyrolactone | C <sub>6</sub> H <sub>8</sub> O <sub>2</sub>    | 1:1 (disorder) | 8.392           | 21.207 | 9.302  | 90       | 93.12   | 90       | 4 | 1653.0 |
| 9                 | 2120775     | P21/n       | $\epsilon$ -caprolactam               | C <sub>6</sub> H <sub>11</sub> NO               | 1:2            | 11.448          | 14.224 | 15.323 | 90       | 111.60  | 90       | 4 | 2319.9 |
| 10                | 2120772     | P21/n       | sulfalone                             | C <sub>4</sub> H <sub>8</sub> O <sub>2</sub> S  | 1:1            | 6.036           | 21.020 | 12.791 | 90       | 94.44   | 90       | 4 | 1618.0 |
| 11                | 2120773     | P21/n       | methylisoxazole                       | C <sub>4</sub> H <sub>5</sub> NO                | 1:1 (disorder) | 8.366           | 21.353 | 9.097  | 90       | 93.37   | 90       | 4 | 1622.3 |
| 12                | 2120774     | P21/n       | $\alpha$ -angelica lactone            | C <sub>8</sub> H <sub>6</sub> O <sub>3</sub>    | 1:1            | 8.194           | 21.111 | 9.570  | 90       | 94.20   | 90       | 4 | 1651.0 |
| 13                | 2120787     | P21/n       | propylene carbonate                   | C <sub>4</sub> H <sub>6</sub> O <sub>3</sub>    | 1:1            | 8.628           | 21.151 | 9.135  | 90       | 97.70   | 90       | 4 | 1652.0 |
| 14                | 2120776     | P21/n       | $\beta$ -butyrolactone                | C <sub>4</sub> H <sub>6</sub> O <sub>2</sub>    | 1:1            | 8.606           | 21.643 | 8.735  | 90       | 98.76   | 90       | 4 | 1608.0 |
| 15                | 2120777     | P21/n       | ( $\pm$ )2-methylcyclopentanone       | C <sub>6</sub> H <sub>10</sub> O                | 1:1 (disorder) | 8.550           | 21.491 | 9.215  | 90       | 89.73   | 90       | 4 | 1693.2 |
| 16                | 2120778     | P21/n       | cyclohexanone                         | C <sub>6</sub> H <sub>10</sub> O                | 1:1 (disorder) | 6.487           | 12.332 | 22.259 | 90       | 94.19   | 90       | 4 | 1775.9 |
| 17                | 2120779     | P21/n       | cycloheptanone                        | C <sub>7</sub> H <sub>12</sub> O                | 1:1 (disorder) | 6.613           | 12.074 | 22.085 | 90       | 93.44   | 90       | 4 | 1760.2 |
| 18                | 2120780     | P21/n       | $\gamma$ -valerolactone               | C <sub>5</sub> H <sub>8</sub> O <sub>2</sub>    | 1:1            | 8.417           | 20.975 | 9.472  | 90       | 93.83   | 90       | 4 | 1668.5 |
| 19                | 2120783     | P21/n       | 4-methylcyclohexanone                 | C <sub>7</sub> H <sub>12</sub> O                | 1:1            | 6.572           | 12.959 | 21.553 | 90       | 92.48   | 90       | 4 | 1832.2 |
| 20                | 2120782     | P21/n       | cyclooctanone                         | C <sub>8</sub> H <sub>14</sub> O                | 2:1            | 8.783           | 14.728 | 23.800 | 90       | 98.46   | 90       | 4 | 3045.2 |
| 21                | 2120803     | P21/n       | cyclopentanone                        | C <sub>5</sub> H <sub>8</sub> O                 | 1:1            | 8.454           | 20.699 | 9.487  | 90       | 92.37   | 90       | 4 | 1658.7 |
| 22                | 2120800     | P21/n       | $\delta$ -valerolactone               | C <sub>5</sub> H <sub>8</sub> O <sub>2</sub>    | 1:1            | 8.583           | 20.652 | 9.520  | 90       | 93.66   | 90       | 4 | 1684.0 |
| 23                | 2120784     | P21/n       | N,N-dimethylpropyleneurea             | C <sub>6</sub> H <sub>12</sub> N <sub>2</sub> O | 2:1            | 16.553          | 9.996  | 19.810 | 90       | 112.26  | 90       | 4 | 3029.9 |
| 24                | 2120785     | C2/c        | cyclopentanol                         | C <sub>5</sub> H <sub>10</sub> O                | 1:1            | 20.705          | 11.385 | 14.136 | 90       | 99.02   | 90       | 8 | 3291.0 |
| 25 <sup>[i]</sup> | 2120786     | P212121     | tetrahydrofuran                       | C <sub>4</sub> H <sub>8</sub> O                 | 2:2            | 9.515           | 16.675 | 19.249 | 90       | 90      | 90       | 8 | 3054.1 |
| 26                | 2120792     | Aba2        | triethylphosphate                     | C <sub>6</sub> H <sub>15</sub> O <sub>4</sub> P | 1:1            | 19.639          | 8.864  | 24.612 | 90       | 90      | 90       | 8 | 4284.5 |

## The extensive solid-form landscape of sulfathiazole: geometrical similarity and interaction energies

David S. Hughes, Ann L. Bingham, Michael B. Hursthouse, Terry L. Threlfall and Andrew D. Bond

### S1. Summary of the multi-component sulfathiazole crystals

#### Co-crystals (total:59)

|                     | CSD Refcode | Space Group | Partner                      | Partner                                                                          | Stoichiometry | Cell dimensions |        |        |          |         |          | Z | V      |
|---------------------|-------------|-------------|------------------------------|----------------------------------------------------------------------------------|---------------|-----------------|--------|--------|----------|---------|----------|---|--------|
|                     |             |             |                              |                                                                                  |               | a               | b      | c      | $\alpha$ | $\beta$ | $\gamma$ |   |        |
| 27                  | 2120799     | Pbca        | tetraoxaspiroundecane        | C <sub>7</sub> H <sub>12</sub> O <sub>4</sub>                                    | 1:1           | 20.406          | 9.016  | 20.494 | 90       | 90      | 90       | 8 | 3770.5 |
| 28                  | 2120789     | P21/n       | suberonitrile                | C <sub>8</sub> H <sub>12</sub> N <sub>2</sub>                                    | 1:0.5         | 8.010           | 20.820 | 8.990  | 90       | 94.65   | 90       | 4 | 1494.3 |
| 29                  | 2120790     | P21/n       | sebaconitrile                | C <sub>10</sub> H <sub>16</sub> N <sub>2</sub>                                   | 1:0.5         | 8.523           | 21.073 | 9.0867 | 90       | 96.54   | 90       | 4 | 1621.5 |
| 30                  | 2120791     | P21/n       | dodecanedinitrile            | C <sub>12</sub> H <sub>20</sub> N <sub>2</sub>                                   | 1:0.5         | 8.679           | 19.911 | 10.022 | 90       | 97.78   | 90       | 4 | 1715.8 |
| 31                  | 2120793     | P21/n       | butyronitrile                | C <sub>4</sub> H <sub>7</sub> N                                                  | 1:1           | 8.248           | 21.019 | 9.074  | 90       | 96.53   | 90       | 4 | 1562.8 |
| 32                  | 2120794     | P21/n       | valeronitrile                | C <sub>5</sub> H <sub>9</sub> N                                                  | 1:1           | 8.476           | 20.718 | 9.611  | 90       | 97.84   | 90       | 4 | 1671.9 |
| 33                  | 2120807     | P21/n       | cyanocyclohexane             | C <sub>7</sub> H <sub>11</sub> N                                                 | 1:1           | 9.112           | 18.994 | 10.590 | 90       | 101.37  | 90       | 4 | 1796.9 |
| 34                  | 2120795     | P21/n       | N-cyanomorpholine            | C <sub>5</sub> H <sub>8</sub> N <sub>2</sub> O                                   | 1:1           | 8.355           | 18.880 | 10.776 | 90       | 96.79   | 90       | 4 | 1687.9 |
| 35 <sup>[ii]</sup>  | 2120796     | P21         | azelanitrile                 | C <sub>9</sub> H <sub>14</sub> N <sub>2</sub>                                    | 2:1           | 8.363           | 21.146 | 9.116  | 90       | 95.76   | 90       | 2 | 1604.0 |
| 36                  | 2120797     | P21/c       | adiponitrile                 | C <sub>6</sub> H <sub>8</sub> N <sub>2</sub>                                     | 1:0.5         | 8.154           | 17.399 | 10.077 | 90       | 101.32  | 90       | 4 | 1401.8 |
| 37                  | 2120798     | P21/c       | pyridazine                   | C <sub>4</sub> H <sub>4</sub> N <sub>2</sub>                                     | 1:1           | 8.390           | 18.813 | 9.540  | 90       | 102.54  | 90       | 4 | 1469.9 |
| 38                  | 2120804     | P21/c       | 4-methylthiazole             | C <sub>4</sub> H <sub>5</sub> NS                                                 | 1:1           | 8.167           | 12.443 | 15.632 | 90       | 96.88   | 90       | 4 | 1577.1 |
| 39                  | 2120805     | Pbca        | propionitrile                | C <sub>3</sub> H <sub>5</sub> N                                                  | 2:2           | 9.045           | 16.864 | 39.421 | 90       | 90      | 90       | 8 | 6013.0 |
| 40                  | 2120802     | Pbca        | cyanocyclopropane            | C <sub>4</sub> H <sub>5</sub> N                                                  | 2:2           | 9.179           | 16.907 | 39.202 | 90       | 90      | 90       | 8 | 6083.7 |
| 41 <sup>[iii]</sup> | 2120819     | P21/c       | N-cyanopyrrolidine           | C <sub>5</sub> H <sub>8</sub> N <sub>2</sub>                                     | 2:2           | 12.213          | 20.550 | 13.583 | 90       | 97.03   | 90       | 8 | 3383.4 |
| 42                  | ADEDIX      | P21/c       | pyridine                     | C <sub>5</sub> H <sub>5</sub> N                                                  | 1:1           | 8.385           | 9.272  | 20.704 | 90       | 100.10  | 90       | 4 | 1584.7 |
| 43 <sup>[iv]</sup>  | ADEDIX02    | P43         | pyridine                     | C <sub>5</sub> H <sub>5</sub> N                                                  | 1:1           | 8.651           | 8.651  | 20.538 | 90       | 90      | 90       | 4 | 1573.2 |
| 44                  | BABYIN      | P21/c       | acetonitrile                 | C <sub>2</sub> H <sub>3</sub> N                                                  | 1:1           | 10.741          | 7.592  | 16.748 | 90       | 103.99  | 90       | 4 | 1325.2 |
| 45                  | BABYOT      | P-1         | N-formylpiperidine           | C <sub>6</sub> H <sub>11</sub> NO                                                | 2:2           | 10.539          | 12.189 | 13.981 | 95.29    | 107.38  | 90.63    | 4 | 1705.3 |
| 46                  | FIZFUR      | P21/n       | 4-nitrobenzoic acid          | C <sub>7</sub> H <sub>5</sub> NO <sub>4</sub>                                    | 1:1           | 6.631           | 15.014 | 17.708 | 90       | 94.55   | 90       | 4 | 1757.4 |
| 47                  | FURDIF      | Pbca        | 1,4-dioxan                   | C <sub>4</sub> H <sub>8</sub> O <sub>2</sub>                                     | 1:1           | 9.424           | 17.195 | 19.560 | 90       | 90      | 90       | 8 | 3169.6 |
| 48                  | HADMUU      | P21/n       | (18-crown-6) / acetonitrile  | C <sub>12</sub> H <sub>24</sub> O <sub>6</sub> / C <sub>2</sub> H <sub>3</sub> N | 1:1:1         | 8.355           | 40.104 | 9.339  | 90       | 111.13  | 90       | 4 | 2918.8 |
| 49                  | KUFWOZ      | P21/c       | 4-aminobenzamide             | C <sub>7</sub> H <sub>8</sub> N <sub>2</sub> O                                   | 1:1           | 10.171          | 10.865 | 16.134 | 90       | 105.05  | 90       | 4 | 1721.6 |
| 50                  | LOFLUP      | P21/n       | pentanedioic acid            | C <sub>5</sub> H <sub>8</sub> O <sub>4</sub>                                     | 1:1           | 8.885           | 13.323 | 14.740 | 90       | 101.16  | 90       | 4 | 1712.0 |
| 51                  | OXIDEG02    | P21/n       | 4,4'-bipyridine-1,1'-dioxide | C <sub>10</sub> H <sub>8</sub> N <sub>2</sub> O <sub>2</sub>                     | 1:1           | 10.532          | 8.551  | 21.750 | 90       | 91.06   | 90       | 4 | 1958.4 |
| 52 <sup>[v]</sup>   | SOGSEO      | P21/c       | N,N-dimethyl propanamide     | C <sub>4</sub> H <sub>9</sub> NO                                                 | 1:1           | 8.258           | 12.153 | 16.561 | 90       | 98.79   | 90       | 4 | 1642.5 |

## The extensive solid-form landscape of sulfathiazole: geometrical similarity and interaction energies

David S. Hughes, Ann L. Bingham, Michael B. Hursthouse, Terry L. Threlfall and Andrew D. Bond

### S1. Summary of the multi-component sulfathiazole crystals

#### Co-crystals (total: 59)

|    | CSD Refcode | Space Group | Partner                                  | Partner                                                       | Stoichiometry | Cell dimensions |        |        |          |         |          | Z | V      |
|----|-------------|-------------|------------------------------------------|---------------------------------------------------------------|---------------|-----------------|--------|--------|----------|---------|----------|---|--------|
|    |             |             |                                          |                                                               |               | a               | b      | c      | $\alpha$ | $\beta$ | $\gamma$ |   |        |
| 53 | STHSAM01    | P21/c       | sulfanilamide                            | C <sub>6</sub> H <sub>8</sub> N <sub>2</sub> O <sub>2</sub> S | 1:1           | 9.135           | 5.379  | 36.633 | 90       | 91.17   | 90       | 4 | 1799.7 |
| 54 | SULTHE01    | P21/c       | theophylline                             | C <sub>7</sub> H <sub>8</sub> N <sub>4</sub> O <sub>2</sub>   | 1:1           | 11.020          | 9.010  | 20.186 | 90       | 113.68  | 90       | 4 | 1835.5 |
| 55 | WIYLAT      | P-1         | 2,4,6-tris(pyridine-2-yl)-1,3,5-triazine | C <sub>18</sub> H <sub>12</sub> N <sub>6</sub>                | 1:1           | 8.811           | 12.722 | 13.170 | 66.23    | 73.80   | 88.07    | 2 | 1292.1 |
| 56 | JUVFOY      | P21/n       | 2-aminopyridine                          | C <sub>5</sub> H <sub>6</sub> N <sub>2</sub>                  | 1:1           | 8.501           | 18.841 | 10.507 | 90       | 104.51  | 90       | 4 | 1629.1 |
| 57 | JUVFUE      | P21/n       | 2-amino-5-methylpyridine                 | C <sub>6</sub> H <sub>8</sub> N <sub>2</sub>                  | 1:1           | 8.358           | 19.281 | 10.997 | 90       | 105.06  | 90       | 4 | 1711.2 |
| 58 | JUVGAL      | P21/n       | 2-amino-5-chloropyridine                 | C <sub>5</sub> H <sub>5</sub> ClN <sub>2</sub>                | 1:1           | 8.403           | 19.276 | 10.962 | 90       | 106.2   | 90       | 4 | 1704.9 |
| 59 | JUVGEP      | P21/n       | 2-amino-5-bromopyridine                  | C <sub>5</sub> H <sub>5</sub> BrN <sub>2</sub>                | 1:1           | 8.379           | 19.645 | 11.117 | 90       | 106.9   | 90       | 4 | 1751.0 |

#### Salts (total: 29)

|    | CSD Refcode | Space Group | Partner                                | Partner                                                       | Stoichiometry | Cell dimensions |        |        |          |         |          | Z  | V      |
|----|-------------|-------------|----------------------------------------|---------------------------------------------------------------|---------------|-----------------|--------|--------|----------|---------|----------|----|--------|
|    |             |             |                                        |                                                               |               | a               | b      | c      | $\alpha$ | $\beta$ | $\gamma$ |    |        |
| 60 | 2120818     | Pna21       | n-methylpyrrolidine                    | [C <sub>5</sub> H <sub>12</sub> N] <sup>+</sup>               | 1:1           | 13.943          | 9.260  | 12.698 | 90       | 90      | 90       | 4  | 1639.5 |
| 61 | 2120809     | Pna21       | 1,5-diazabicyclo[4.3.0]non-5-ene (DBN) | [C <sub>7</sub> H <sub>13</sub> N <sub>2</sub> ] <sup>+</sup> | 1:1           | 15.807          | 10.126 | 10.754 | 90       | 90      | 90       | 4  | 1721.3 |
| 62 | 2120808     | P212121     | piperidine                             | [C <sub>5</sub> H <sub>12</sub> N] <sup>+</sup>               | 1:1           | 6.948           | 14.868 | 15.958 | 90       | 90      | 90       | 4  | 1648.5 |
| 63 | 2120814     | P212121     | morpholine                             | [C <sub>4</sub> H <sub>10</sub> NO] <sup>+</sup>              | 1:1           | 6.592           | 15.155 | 15.689 | 90       | 90      | 90       | 4  | 1567.4 |
| 64 | 2120812     | Fdd2        | 2-methyl-2-imidazoline                 | [C <sub>4</sub> H <sub>9</sub> N] <sup>+</sup>                | 1:1           | 17.562          | 42.270 | 8.291  | 90       | 90      | 90       | 16 | 6220.3 |
| 65 | 2120810     | P21         | 1,1,3,3-tetramethylguanidine           | [C <sub>5</sub> H <sub>14</sub> N <sub>3</sub> ] <sup>+</sup> | 2:2           | 10.449          | 13.331 | 13.664 | 90       | 110.38  | 90       | 4  | 1784.2 |
| 66 | 2120816     | P21/c       | cyclohexylamine                        | [C <sub>6</sub> H <sub>14</sub> N] <sup>+</sup>               | 1:1           | 8.081           | 16.676 | 13.169 | 90       | 104.56  | 90       | 4  | 1717.7 |
| 67 | 2120811     | P21/c       | N,N-dimethylamine                      | [C <sub>2</sub> H <sub>8</sub> N] <sup>+</sup>                | 2:2           | 20.623          | 8.320  | 18.157 | 90       | 115.64  | 90       | 4  | 2808.5 |
| 68 | 2120817     | C2/c        | ethylenediamine                        | [C <sub>2</sub> H <sub>8</sub> N <sub>2</sub> ] <sup>+</sup>  | 1:1           | 10.838          | 11.826 | 22.321 | 90       | 90.14   | 90       | 8  | 2860.9 |
| 69 | 2120813     | P212121     | methylpiperazine                       | [C <sub>5</sub> H <sub>13</sub> N <sub>2</sub> ] <sup>+</sup> | 1:1           | 8.401           | 11.142 | 17.746 | 90       | 90      | 90       | 4  | 1661.1 |
| 70 | BUHMOI      | P21/c       | amino (phenyl) methaminium             | [C <sub>7</sub> H <sub>9</sub> N <sub>2</sub> ] <sup>+</sup>  | 1:1           | 13.949          | 8.327  | 16.944 | 90       | 113.29  | 90       | 4  | 1807.9 |
| 71 | BUWDUT      | C2/c        | hexafluorosilicate                     | [SiF <sub>6</sub> ] <sup>2-</sup>                             | 1:0.5         | 17.723          | 11.684 | 11.938 | 90       | 91.78   | 90       | 4  | 1235.4 |
| 72 | DOWPUC      | P212121     | 4-aza-1-azobicyclo-2,2-octane          | [C <sub>6</sub> H <sub>13</sub> N <sub>2</sub> ] <sup>+</sup> | 1:1           | 15.349          | 6.620  | 17.148 | 90       | 90      | 90       | 4  | 1742.4 |



## The extensive solid-form landscape of sulfathiazole: geometrical similarity and interaction energies

David S. Hughes, Ann L. Bingham, Michael B. Hursthouse, Terry L. Threlfall and Andrew D. Bond

### S1. Summary of the multi-component sulfathiazole crystals

#### Salts (total: 29)

|                      | CSD Refcode | Space Group | Partner                                        | Partner                                                   | Stoichiometry | Cell dimensions |        |        |          |         |          | Z | V      |
|----------------------|-------------|-------------|------------------------------------------------|-----------------------------------------------------------|---------------|-----------------|--------|--------|----------|---------|----------|---|--------|
|                      |             |             |                                                |                                                           |               | a               | b      | c      | $\alpha$ | $\beta$ | $\gamma$ |   |        |
| 73                   | DOWQAJ      | P212121     | piperazin-1-ium                                | $[\text{C}_4\text{H}_{11}\text{N}_2]^+$                   | 1:1           | 8.416           | 10.181 | 17.941 | 90       | 90      | 90       | 4 | 1537.2 |
| 74                   | HSLSTZ      | P-1         | mafénide                                       | $[\text{C}_7\text{H}_{11}\text{N}_2\text{O}_2\text{S}]^+$ | 1:1           | 12.106          | 10.421 | 8.284  | 102.98   | 903     | 107.72   | 2 | 967.4  |
| 75                   | LOFMAW      | P21/c       | oxalic acid                                    | $[\text{C}_2\text{HO}_4]^-$                               | 1:1           | 8.039           | 19.934 | 8.636  | 90       | 97.72   | 90       | 4 | 1371.4 |
| 76                   | LOFMAW01    | P21/c       | oxalic acid                                    | $[\text{C}_2\text{HO}_4]^-$                               | 1:1           | 10.692          | 10.546 | 13.213 | 90       | 112.41  | 90       | 4 | 1377.2 |
| 77                   | OHUWAR      | P21/n       | 2-hydroxy-N-methylethaniniumazanide            | $[\text{C}_3\text{H}_{10}\text{NO}]^+$                    | 1:1           | 7.877           | 12.109 | 16.048 | 90       | 102.69  | 90       | 4 | 1493.4 |
| 78                   | OHUWEV      | P21/c       | N-(2-hydroxyethyl)-propan-2-aminiumazanide     | $[\text{C}_5\text{H}_{14}\text{NO}]^+$                    | 1:1           | 8.976           | 11.444 | 17.367 | 90       | 99.30   | 90       | 4 | 1760.6 |
| 79                   | OHUWIZ      | P21/c       | 2-hydroxy-N-(2-hydroxyethyl) ethaniniumazanide | $[\text{C}_4\text{H}_{12}\text{NO}_2]^+$                  | 1:1           | 8.012           | 12.743 | 16.799 | 90       | 102.20  | 90       | 4 | 1676.5 |
| 80                   | QEDWAZ      | P21/c       | 1-butyl(2-hydroxyethyl)ammonium                | $[\text{C}_6\text{H}_{16}\text{NO}]^+$                    | 2:2           | 13.893          | 11.771 | 22.191 | 90       | 91.40   | 90       | 4 | 3627.9 |
| 81                   | UDAKOA      | P21/c       | nitrate monohydrate                            | $[\text{NO}_3]^- / \text{H}_2\text{O}$                    | 1:1:1         | 12.192          | 7.635  | 15.389 | 90       | 107.47  | 90       | 4 | 1366.4 |
| 82                   | XIFPEI01    | P21/n       | lysidine                                       | $[\text{C}_4\text{H}_9\text{N}_2]^+$                      | 1:1           | 12.179          | 9.610  | 13.353 | 90       | 101.92  | 90       | 4 | 1529.1 |
| 83                   | VEYQUO      | P21/n       | nitric acid / nitrate                          | $\text{HNO}_3 / 2[\text{NO}_3]^-$                         | 2:1:2         | 14.948          | 8.259  | 22.962 | 90       | 100.82  | 90       | 4 | 2784.3 |
| 84                   | VEYRAV      | P21/c       | tetrafluoroborate                              | $[\text{BF}_4]^-$                                         | 1:1           | 8.056           | 9.942  | 17.209 | 90       | 90.57   | 90       | 4 | 1378.2 |
| 85 <sup>[vi]</sup>   | VEYREZ      | Cc          | sulfate monohydrate                            | $[\text{SO}_4]^{2-} / \text{H}_2\text{O}$                 | 2:1:1         | 17.473          | 11.624 | 11.756 | 90       | 90      | 90       | 4 | 2387.8 |
| 86 <sup>[vii]</sup>  | VEYYEG      | Pna21       | besylate                                       | $[\text{C}_6\text{H}_5\text{O}_3\text{S}]^-$              | 2:2           | 15.530          | 8.145  | 28.496 | 90       | 90      | 90       | 8 | 3604.2 |
| 87 <sup>[viii]</sup> | FIFWOJ      | P21/n       | tosylate                                       | $[\text{C}_7\text{H}_7\text{O}_3\text{S}]^-$              | 1:1           | 14.639          | 5.984  | 20.927 | 90       | 94.78   | 90       | 4 | 1826.6 |
| 88                   | RUMXAB      | P21/c       | 1-admantylammonium                             | $[\text{C}_{10}\text{H}_{18}\text{N}]^+$                  | 1:1           | 8.810           | 17.171 | 13.250 | 90       | 101.1   | 90       | 4 | 1966.9 |

#### Other (total: 3)

|                    | CSD Refcode | Space Group | Partner                     | Partner                                                                                   | Stoichiometry                   | Cell dimensions |        |        |          |         |          | Z | V      |
|--------------------|-------------|-------------|-----------------------------|-------------------------------------------------------------------------------------------|---------------------------------|-----------------|--------|--------|----------|---------|----------|---|--------|
|                    |             |             |                             |                                                                                           |                                 | a               | b      | c      | $\alpha$ | $\beta$ | $\gamma$ |   |        |
| 89 <sup>[ix]</sup> | 2120815     | P21         | (-)-sparteine               | $[\text{C}_{15}\text{H}_{27}\text{N}_2]^+$                                                | 2(SLFZ):2(SLFZ <sup>-</sup> ):2 | 16.676          | 11.771 | 19.062 | 90       | 111.71  | 90       | 2 | 3476.3 |
| 90                 | KUFWIT      | P-1         | 2,4-dinitrobenzoic acid     | $[\text{C}_7\text{H}_3\text{N}_2\text{O}_6]^- / \text{C}_7\text{H}_4\text{N}_2\text{O}_6$ | 1:1:1                           | 8.184           | 13.358 | 13.519 | 86.79    | 79.56   | 76.49    | 2 | 1413.0 |
| 91                 | VUKTAZ      | P21/n       | 1-admantylammonium chloride | $[\text{C}_{10}\text{H}_{18}\text{N}]^+ / \text{Cl}^-$                                    | 1:1:1                           | 6.511           | 19.151 | 17.662 | 90       | 98.69   | 90       | 4 | 2176.9 |

## The extensive solid-form landscape of sulfathiazole: geometrical similarity and interaction energies

David S. Hughes, Ann L. Bingham, Michael B. Hursthouse, Terry L. Threlfall and Andrew D. Bond

### S2. Crystallographic information for the new crystal structures

|                                                               | 1                                                                                                                                  | 2                                                                                                             | 3                                                                                                                                | 4                                                                                                                    | 5                                                                                                            | 6                                                                                                                                |
|---------------------------------------------------------------|------------------------------------------------------------------------------------------------------------------------------------|---------------------------------------------------------------------------------------------------------------|----------------------------------------------------------------------------------------------------------------------------------|----------------------------------------------------------------------------------------------------------------------|--------------------------------------------------------------------------------------------------------------|----------------------------------------------------------------------------------------------------------------------------------|
| CCDC number                                                   | 2120788                                                                                                                            | 2120806                                                                                                       | 2120768                                                                                                                          | 2120769                                                                                                              | 2120801                                                                                                      | 2120771                                                                                                                          |
| Moiety formula                                                | 2(C <sub>9</sub> H <sub>9</sub> N <sub>3</sub> O <sub>2</sub> S <sub>2</sub> ),<br>C <sub>5</sub> H <sub>10</sub> N <sub>2</sub> O | C <sub>9</sub> H <sub>9</sub> N <sub>3</sub> O <sub>2</sub> S <sub>2</sub> , C <sub>6</sub> H <sub>12</sub> O | 2(C <sub>9</sub> H <sub>9</sub> N <sub>3</sub> O <sub>2</sub> S <sub>2</sub> ),<br>C <sub>7</sub> H <sub>12</sub> O <sub>4</sub> | 2(C <sub>9</sub> H <sub>9</sub> N <sub>3</sub> O <sub>2</sub> S <sub>2</sub> ),<br>C <sub>9</sub> H <sub>19</sub> NO | C <sub>9</sub> H <sub>9</sub> N <sub>3</sub> O <sub>2</sub> S <sub>2</sub> , C <sub>3</sub> H <sub>6</sub> O | 2(C <sub>9</sub> H <sub>9</sub> N <sub>3</sub> O <sub>2</sub> S <sub>2</sub> ),<br>C <sub>6</sub> H <sub>10</sub> O <sub>4</sub> |
| Total formula                                                 | C <sub>23</sub> H <sub>28</sub> N <sub>8</sub> O <sub>5</sub> S <sub>4</sub>                                                       | C <sub>15</sub> H <sub>21</sub> N <sub>3</sub> O <sub>3</sub> S <sub>2</sub>                                  | C <sub>25</sub> H <sub>30</sub> N <sub>6</sub> O <sub>8</sub> S <sub>4</sub>                                                     | C <sub>27</sub> H <sub>37</sub> N <sub>7</sub> O <sub>5</sub> S <sub>4</sub>                                         | C <sub>12</sub> H <sub>15</sub> N <sub>3</sub> O <sub>3</sub> S <sub>2</sub>                                 | C <sub>24</sub> H <sub>28</sub> N <sub>6</sub> O <sub>8</sub> S <sub>4</sub>                                                     |
| Formula weight                                                | 624.77                                                                                                                             | 355.47                                                                                                        | 670.79                                                                                                                           | 667.87                                                                                                               | 313.39                                                                                                       | 656.76                                                                                                                           |
| Temperature / K                                               | 150(2)                                                                                                                             | 150(2)                                                                                                        | 150(2)                                                                                                                           | 150(2)                                                                                                               | 150(2)                                                                                                       | 150(2)                                                                                                                           |
| Crystal system                                                | triclinic                                                                                                                          | monoclinic                                                                                                    | monoclinic                                                                                                                       | monoclinic                                                                                                           | monoclinic                                                                                                   | monoclinic                                                                                                                       |
| Space group                                                   | P -1                                                                                                                               | P 21                                                                                                          | P c                                                                                                                              | C c                                                                                                                  | P 21/c                                                                                                       | P 21/c                                                                                                                           |
| <i>a</i> / Å                                                  | 8.051(2)                                                                                                                           | 8.541(2)                                                                                                      | 8.409(2)                                                                                                                         | 16.616(3)                                                                                                            | 8.322(1)                                                                                                     | 8.416(2)                                                                                                                         |
| <i>b</i> / Å                                                  | 11.492(2)                                                                                                                          | 12.401(2)                                                                                                     | 16.640(1)                                                                                                                        | 16.088(3)                                                                                                            | 16.020(1)                                                                                                    | 17.394(3)                                                                                                                        |
| <i>c</i> / Å                                                  | 15.552(3)                                                                                                                          | 8.836(2)                                                                                                      | 11.274(1)                                                                                                                        | 12.630(3)                                                                                                            | 11.352(1)                                                                                                    | 10.342(2)                                                                                                                        |
| $\alpha$ / °                                                  | 77.45(3)                                                                                                                           | 90                                                                                                            | 90                                                                                                                               | 90                                                                                                                   | 90                                                                                                           | 90                                                                                                                               |
| $\beta$ / °                                                   | 88.64(2)                                                                                                                           | 102.96(3)                                                                                                     | 101.37(2)                                                                                                                        | 110.69(3)                                                                                                            | 100.29(1)                                                                                                    | 104.70(3)                                                                                                                        |
| $\gamma$ / °                                                  | 88.64(2)                                                                                                                           | 90                                                                                                            | 90                                                                                                                               | 90                                                                                                                   | 90                                                                                                           | 90                                                                                                                               |
| Unit-cell volume / Å <sup>3</sup>                             | 1403.9(5)                                                                                                                          | 912.0(3)                                                                                                      | 1546.6(4)                                                                                                                        | 3158.5(13)                                                                                                           | 1489.1(2)                                                                                                    | 1464.4(6)                                                                                                                        |
| <i>Z</i>                                                      | 2                                                                                                                                  | 2                                                                                                             | 2                                                                                                                                | 4                                                                                                                    | 4                                                                                                            | 2                                                                                                                                |
| Calc. density / g cm <sup>-3</sup>                            | 1.478                                                                                                                              | 1.294                                                                                                         | 1.440                                                                                                                            | 1.405                                                                                                                | 1.398                                                                                                        | 1.489                                                                                                                            |
| <i>F</i> (000)                                                | 652                                                                                                                                | 376                                                                                                           | 700                                                                                                                              | 1408                                                                                                                 | 656                                                                                                          | 684                                                                                                                              |
| Radiation type                                                | Mo K $\alpha$                                                                                                                      | Mo K $\alpha$                                                                                                 | Cu K $\alpha$                                                                                                                    | Mo K $\alpha$                                                                                                        | Mo K $\alpha$                                                                                                | Mo K $\alpha$                                                                                                                    |
| Absorption coefficient / mm <sup>-1</sup>                     | 0.389                                                                                                                              | 0.308                                                                                                         | 3.313                                                                                                                            | 0.350                                                                                                                | 0.367                                                                                                        | 0.382                                                                                                                            |
| Crystal size / mm <sup>3</sup>                                | 0.30 x 0.20 x 0.15                                                                                                                 | 0.30 x 0.10 x 0.10                                                                                            | 0.30 x 0.20 x 0.20                                                                                                               | 0.20 x 0.20 x 0.15                                                                                                   | 0.30 x 0.10 x 0.10                                                                                           | 0.20 x 0.20 x 0.20                                                                                                               |
| 2 $\theta$ range / °                                          | 4.02-43.93                                                                                                                         | 4.73-43.91                                                                                                    | 5.31-88.78                                                                                                                       | 5.24-55.02                                                                                                           | 4.45-43.93                                                                                                   | 4.68-43.92                                                                                                                       |
| Completeness to max 2 $\theta$                                | 0.999                                                                                                                              | 0.969                                                                                                         | 0.998                                                                                                                            | 0.998                                                                                                                | 0.929                                                                                                        | 0.945                                                                                                                            |
| No. of reflections measured                                   | 10840                                                                                                                              | 3242                                                                                                          | 1335                                                                                                                             | 13211                                                                                                                | 4319                                                                                                         | 4521                                                                                                                             |
| No. of independent reflections                                | 3429                                                                                                                               | 1960                                                                                                          | 1335                                                                                                                             | 6380                                                                                                                 | 1687                                                                                                         | 1686                                                                                                                             |
| <i>R</i> (int)                                                | 0.1093                                                                                                                             | 0.1004                                                                                                        | 0.0213                                                                                                                           | 0.0366                                                                                                               | 0.1333                                                                                                       | 0.0855                                                                                                                           |
| No. parameters / restraints                                   | 376 / 6                                                                                                                            | 210 / 31                                                                                                      | 388 / 78                                                                                                                         | 388 / 2                                                                                                              | 190 / 15                                                                                                     | 191 / 0                                                                                                                          |
| Final <i>R</i> 1 values [ <i>I</i> > 2 $\sigma$ ( <i>I</i> )] | 0.0498                                                                                                                             | 0.0472                                                                                                        | 0.0396                                                                                                                           | 0.0356                                                                                                               | 0.0516                                                                                                       | 0.0605                                                                                                                           |
| Final <i>wR</i> ( <i>F</i> <sup>2</sup> ) values (all data)   | 0.1069                                                                                                                             | 0.0891                                                                                                        | 0.1141                                                                                                                           | 0.0859                                                                                                               | 0.1167                                                                                                       | 0.1296                                                                                                                           |
| Goodness-of-fit on <i>F</i> <sup>2</sup>                      | 0.949                                                                                                                              | 0.683                                                                                                         | 1.055                                                                                                                            | 1.026                                                                                                                | 0.836                                                                                                        | 0.791                                                                                                                            |
| Largest difference peak & hole / e Å <sup>-3</sup>            | 0.275, -0.278                                                                                                                      | 0.259, -0.195                                                                                                 | 0.356, -0.239                                                                                                                    | 0.236, -0.365                                                                                                        | 0.333, -0.338                                                                                                | 0.490, -0.290                                                                                                                    |
| Flack parameter                                               |                                                                                                                                    | 0.6(2) [undetermined]                                                                                         | 0.03(4)                                                                                                                          | 0.02(4)                                                                                                              |                                                                                                              |                                                                                                                                  |

## The extensive solid-form landscape of sulfathiazole: geometrical similarity and interaction energies

David S. Hughes, Ann L. Bingham, Michael B. Hursthouse, Terry L. Threlfall and Andrew D. Bond

### S2. Crystallographic information for the new crystal structures

|                                                               | 7                                                                                                                            | 8 [SQUEEZE]                                                                                                                     | 9                                                                                                                    | 10                                                                                                                             | 11                                                                                                               | 12                                                                                                                           | 13                                                                                                                           |
|---------------------------------------------------------------|------------------------------------------------------------------------------------------------------------------------------|---------------------------------------------------------------------------------------------------------------------------------|----------------------------------------------------------------------------------------------------------------------|--------------------------------------------------------------------------------------------------------------------------------|------------------------------------------------------------------------------------------------------------------|------------------------------------------------------------------------------------------------------------------------------|------------------------------------------------------------------------------------------------------------------------------|
| CCDC number                                                   | 2120781                                                                                                                      | 2120770                                                                                                                         | 2120775                                                                                                              | 2120772                                                                                                                        | 2120773                                                                                                          | 2120774                                                                                                                      | 2120787                                                                                                                      |
| Moiety formula                                                | C <sub>9</sub> H <sub>9</sub> N <sub>3</sub> O <sub>2</sub> S <sub>2</sub> ,<br>C <sub>4</sub> H <sub>6</sub> O <sub>2</sub> | C <sub>9</sub> H <sub>9</sub> N <sub>3</sub> O <sub>2</sub> S <sub>2</sub> ,<br>[C <sub>5</sub> H <sub>8</sub> O <sub>4</sub> ] | C <sub>9</sub> H <sub>9</sub> N <sub>3</sub> O <sub>2</sub> S <sub>2</sub> ,<br>2(C <sub>6</sub> H <sub>11</sub> NO) | C <sub>9</sub> H <sub>9</sub> N <sub>3</sub> O <sub>2</sub> S <sub>2</sub> ,<br>C <sub>4</sub> H <sub>8</sub> O <sub>2</sub> S | C <sub>9</sub> H <sub>9</sub> N <sub>3</sub> O <sub>2</sub> S <sub>2</sub> ,<br>C <sub>4</sub> H <sub>5</sub> NO | C <sub>9</sub> H <sub>9</sub> N <sub>3</sub> O <sub>2</sub> S <sub>2</sub> ,<br>C <sub>5</sub> H <sub>6</sub> O <sub>2</sub> | C <sub>9</sub> H <sub>9</sub> N <sub>3</sub> O <sub>2</sub> S <sub>2</sub> ,<br>C <sub>4</sub> H <sub>6</sub> O <sub>3</sub> |
| Total formula                                                 | C <sub>13</sub> H <sub>15</sub> N <sub>3</sub> O <sub>4</sub> S <sub>2</sub>                                                 | C <sub>14</sub> H <sub>17</sub> N <sub>3</sub> O <sub>4</sub> S <sub>2</sub>                                                    | C <sub>21</sub> H <sub>31</sub> N <sub>5</sub> O <sub>4</sub> S <sub>2</sub>                                         | C <sub>13</sub> H <sub>17</sub> N <sub>3</sub> O <sub>4</sub> S <sub>3</sub>                                                   | C <sub>13</sub> H <sub>14</sub> N <sub>4</sub> O <sub>3</sub> S <sub>2</sub>                                     | C <sub>14</sub> H <sub>15</sub> N <sub>3</sub> O <sub>4</sub> S <sub>2</sub>                                                 | C <sub>13</sub> H <sub>15</sub> N <sub>3</sub> O <sub>5</sub> S <sub>2</sub>                                                 |
| Formula weight                                                | 341.40                                                                                                                       | 355.42                                                                                                                          | 481.63                                                                                                               | 375.47                                                                                                                         | 338.40                                                                                                           | 353.41                                                                                                                       | 357.40                                                                                                                       |
| Temperature / K                                               | 293(2)                                                                                                                       | 150(2)                                                                                                                          | 150(2)                                                                                                               | 150(2)                                                                                                                         | 150(2)                                                                                                           | 150(2)                                                                                                                       | 150(2)                                                                                                                       |
| Crystal system                                                | monoclinic                                                                                                                   | monoclinic                                                                                                                      | monoclinic                                                                                                           | monoclinic                                                                                                                     | monoclinic                                                                                                       | monoclinic                                                                                                                   | monoclinic                                                                                                                   |
| Space group                                                   | P 21/c                                                                                                                       | P 21/n                                                                                                                          | P 21/n                                                                                                               | P 21/n                                                                                                                         | P 21/n                                                                                                           | P 21/n                                                                                                                       | P 21/n                                                                                                                       |
| <i>a</i> / Å                                                  | 8.636(2)                                                                                                                     | 8.392(2)                                                                                                                        | 11.448(2)                                                                                                            | 6.036(1)                                                                                                                       | 8.366(2)                                                                                                         | 8.194(2)                                                                                                                     | 8.628(2)                                                                                                                     |
| <i>b</i> / Å                                                  | 19.187(4)                                                                                                                    | 21.207(4)                                                                                                                       | 14.224(3)                                                                                                            | 21.020(4)                                                                                                                      | 21.353(4)                                                                                                        | 21.111(4)                                                                                                                    | 21.151(4)                                                                                                                    |
| <i>c</i> / Å                                                  | 9.354(2)                                                                                                                     | 9.302(2)                                                                                                                        | 15.323(3)                                                                                                            | 12.791(3)                                                                                                                      | 9.097(2)                                                                                                         | 9.570(2)                                                                                                                     | 9.135(2)                                                                                                                     |
| $\alpha$ / °                                                  | 90                                                                                                                           | 90                                                                                                                              | 90                                                                                                                   | 90                                                                                                                             | 90                                                                                                               | 90                                                                                                                           | 90                                                                                                                           |
| $\beta$ / °                                                   | 91.03(3)                                                                                                                     | 93.12(3)                                                                                                                        | 111.60(3)                                                                                                            | 94.44(3)                                                                                                                       | 93.37(3)                                                                                                         | 94.20(3)                                                                                                                     | 97.70(3)                                                                                                                     |
| $\gamma$ / °                                                  | 90                                                                                                                           | 90                                                                                                                              | 90                                                                                                                   | 90                                                                                                                             | 90                                                                                                               | 90                                                                                                                           | 90                                                                                                                           |
| Unit-cell volume / Å <sup>3</sup>                             | 1549.7(6)                                                                                                                    | 1653.0(6)                                                                                                                       | 2319.9(9)                                                                                                            | 1618.0(6)                                                                                                                      | 1622.3(6)                                                                                                        | 1651.0(6)                                                                                                                    | 1652.0(6)                                                                                                                    |
| Z                                                             | 4                                                                                                                            | 4                                                                                                                               | 4                                                                                                                    | 4                                                                                                                              | 4                                                                                                                | 4                                                                                                                            | 4                                                                                                                            |
| Calc. density / g cm <sup>-3</sup>                            | 1.463                                                                                                                        | 1.428                                                                                                                           | 1.379                                                                                                                | 1.541                                                                                                                          | 1.386                                                                                                            | 1.422                                                                                                                        | 1.437                                                                                                                        |
| <i>F</i> (000)                                                | 712                                                                                                                          | 744                                                                                                                             | 1024                                                                                                                 | 784                                                                                                                            | 704                                                                                                              | 736                                                                                                                          | 744                                                                                                                          |
| Radiation type                                                | Cu K $\alpha$                                                                                                                | Mo K $\alpha$                                                                                                                   | Mo K $\alpha$                                                                                                        | Mo K $\alpha$                                                                                                                  | Mo K $\alpha$                                                                                                    | Mo K $\alpha$                                                                                                                | Mo K $\alpha$                                                                                                                |
| Absorption coefficient / mm <sup>-1</sup>                     | 3.318                                                                                                                        | 0.345                                                                                                                           | 0.268                                                                                                                | 0.481                                                                                                                          | 0.345                                                                                                            | 0.345                                                                                                                        | 0.350                                                                                                                        |
| Crystal size / mm <sup>3</sup>                                | 0.30 x 0.30 x 0.30                                                                                                           | 0.30 x 0.30 x 0.30                                                                                                              | 0.30 x 0.30 x 0.30                                                                                                   | 0.30 x 0.10 x 0.10                                                                                                             | 0.20 x 0.20 x 0.20                                                                                               | 0.20 x 0.20 x 0.20                                                                                                           | 0.30 x 0.30 x 0.20                                                                                                           |
| 2 $\theta$ range / °                                          | 9.22-148.46                                                                                                                  | 4.79-49.96                                                                                                                      | 6.25-61.05                                                                                                           | 3.74-50.16                                                                                                                     | 3.81-43.92                                                                                                       | 3.86-43.93                                                                                                                   | 3.85-43.93                                                                                                                   |
| Completeness to max 2 $\theta$                                | 0.968                                                                                                                        | 0.997                                                                                                                           | 0.957                                                                                                                | 0.844                                                                                                                          | 0.952                                                                                                            | 0.960                                                                                                                        | 0.956                                                                                                                        |
| No. of reflections measured                                   | 3240                                                                                                                         | 9723                                                                                                                            | 13166                                                                                                                | 6447                                                                                                                           | 5049                                                                                                             | 5433                                                                                                                         | 5401                                                                                                                         |
| No. of independent reflections                                | 3059                                                                                                                         | 2893                                                                                                                            | 6771                                                                                                                 | 2422                                                                                                                           | 1891                                                                                                             | 1932                                                                                                                         | 1929                                                                                                                         |
| <i>R</i> (int)                                                | 0.0174                                                                                                                       | 0.0861                                                                                                                          | 0.0348                                                                                                               | 0.1754                                                                                                                         | 0.1113                                                                                                           | 0.0819                                                                                                                       | 0.1218                                                                                                                       |
| No. parameters / restraints                                   | 206 / 3                                                                                                                      | 145 / 0                                                                                                                         | 296 / 3                                                                                                              | 108 / 18                                                                                                                       | 183 / 19                                                                                                         | 209 / 0                                                                                                                      | 209 / 0                                                                                                                      |
| Final <i>R</i> 1 values [ <i>I</i> > 2 $\sigma$ ( <i>I</i> )] | 0.0554                                                                                                                       | 0.0523                                                                                                                          | 0.0552                                                                                                               | 0.0678                                                                                                                         | 0.0594                                                                                                           | 0.0473                                                                                                                       | 0.0474                                                                                                                       |
| Final <i>wR</i> ( <i>F</i> <sup>2</sup> ) values (all data)   | 0.1754                                                                                                                       | 0.1554                                                                                                                          | 0.1520                                                                                                               | 0.1551                                                                                                                         | 0.1440                                                                                                           | 0.1035                                                                                                                       | 0.0981                                                                                                                       |
| Goodness-of-fit on <i>F</i> <sup>2</sup>                      | 1.118                                                                                                                        | 1.000                                                                                                                           | 1.029                                                                                                                | 0.814                                                                                                                          | 0.791                                                                                                            | 0.698                                                                                                                        | 0.802                                                                                                                        |
| Largest difference peak & hole / e Å <sup>-3</sup>            | 0.394, -0.405                                                                                                                | 0.231, -0.357                                                                                                                   | 0.767, -0.790                                                                                                        | 0.735, -0.673                                                                                                                  | 0.339, -0.267                                                                                                    | 0.198, -0.168                                                                                                                | 0.263, -0.185                                                                                                                |
| Flack parameter                                               |                                                                                                                              |                                                                                                                                 |                                                                                                                      |                                                                                                                                |                                                                                                                  |                                                                                                                              |                                                                                                                              |

## The extensive solid-form landscape of sulfathiazole: geometrical similarity and interaction energies

David S. Hughes, Ann L. Bingham, Michael B. Hursthouse, Terry L. Threlfall and Andrew D. Bond

### S2. Crystallographic information for the new crystal structures

|                                                               | 14                                                                                                                           | 15                                                                                                               | 16                                                                                                               | 17                                                                                                               | 18                                                                                                                           | 19                                                                                                               | 20                                                                                                                  |
|---------------------------------------------------------------|------------------------------------------------------------------------------------------------------------------------------|------------------------------------------------------------------------------------------------------------------|------------------------------------------------------------------------------------------------------------------|------------------------------------------------------------------------------------------------------------------|------------------------------------------------------------------------------------------------------------------------------|------------------------------------------------------------------------------------------------------------------|---------------------------------------------------------------------------------------------------------------------|
| CCDC number                                                   | 2120776                                                                                                                      | 2120777                                                                                                          | 2120778                                                                                                          | 2120779                                                                                                          | 2120780                                                                                                                      | 2120783                                                                                                          | 2120782                                                                                                             |
| Moiety formula                                                | C <sub>9</sub> H <sub>9</sub> N <sub>3</sub> O <sub>2</sub> S <sub>2</sub> ,<br>C <sub>4</sub> H <sub>6</sub> O <sub>2</sub> | C <sub>9</sub> H <sub>9</sub> N <sub>3</sub> O <sub>2</sub> S <sub>2</sub> ,<br>C <sub>6</sub> H <sub>10</sub> O | C <sub>9</sub> H <sub>9</sub> N <sub>3</sub> O <sub>2</sub> S <sub>2</sub> ,<br>C <sub>6</sub> H <sub>10</sub> O | C <sub>9</sub> H <sub>9</sub> N <sub>3</sub> O <sub>2</sub> S <sub>2</sub> ,<br>C <sub>7</sub> H <sub>12</sub> O | C <sub>9</sub> H <sub>9</sub> N <sub>3</sub> O <sub>2</sub> S <sub>2</sub> ,<br>C <sub>5</sub> H <sub>8</sub> O <sub>2</sub> | C <sub>9</sub> H <sub>9</sub> N <sub>3</sub> O <sub>2</sub> S <sub>2</sub> ,<br>C <sub>7</sub> H <sub>12</sub> O | 2(C <sub>9</sub> H <sub>9</sub> N <sub>3</sub> O <sub>2</sub> S <sub>2</sub> ),<br>C <sub>8</sub> H <sub>14</sub> O |
| Total formula                                                 | C <sub>13</sub> H <sub>15</sub> N <sub>3</sub> O <sub>4</sub> S <sub>2</sub>                                                 | C <sub>15</sub> H <sub>19</sub> N <sub>3</sub> O <sub>3</sub> S <sub>2</sub>                                     | C <sub>15</sub> H <sub>19</sub> N <sub>3</sub> O <sub>3</sub> S <sub>2</sub>                                     | C <sub>16</sub> H <sub>21</sub> N <sub>3</sub> O <sub>3</sub> S <sub>2</sub>                                     | C <sub>14</sub> H <sub>17</sub> N <sub>3</sub> O <sub>4</sub> S <sub>2</sub>                                                 | C <sub>16</sub> H <sub>21</sub> N <sub>3</sub> O <sub>3</sub> S <sub>2</sub>                                     | C <sub>26</sub> H <sub>32</sub> N <sub>6</sub> O <sub>5</sub> S <sub>4</sub>                                        |
| Formula weight                                                | 341.40                                                                                                                       | 353.45                                                                                                           | 353.45                                                                                                           | 367.48                                                                                                           | 355.42                                                                                                                       | 367.48                                                                                                           | 636.81                                                                                                              |
| Temperature / K                                               | 150(2)                                                                                                                       | 150(2)                                                                                                           | 150(2)                                                                                                           | 150(2)                                                                                                           | 293(2)                                                                                                                       | 150(2)                                                                                                           | 293(2)                                                                                                              |
| Crystal system                                                | monoclinic                                                                                                                   | monoclinic                                                                                                       | monoclinic                                                                                                       | monoclinic                                                                                                       | monoclinic                                                                                                                   | monoclinic                                                                                                       | monoclinic                                                                                                          |
| Space group                                                   | P 21/n                                                                                                                       | P 21/n                                                                                                           | P 21/n                                                                                                           | P 21/n                                                                                                           | P 21/n                                                                                                                       | P 21/n                                                                                                           | P 21/n                                                                                                              |
| <i>a</i> / Å                                                  | 8.606(2)                                                                                                                     | 8.550(2)                                                                                                         | 6.487(3)                                                                                                         | 6.613(3)                                                                                                         | 8.417(2)                                                                                                                     | 6.572(1)                                                                                                         | 8.783(1)                                                                                                            |
| <i>b</i> / Å                                                  | 21.643(4)                                                                                                                    | 21.491(4)                                                                                                        | 12.332(4)                                                                                                        | 12.074(3)                                                                                                        | 20.975(4)                                                                                                                    | 12.959(3)                                                                                                        | 14.728(4)                                                                                                           |
| <i>c</i> / Å                                                  | 8.735(2)                                                                                                                     | 9.215(2)                                                                                                         | 22.259(3)                                                                                                        | 22.085(3)                                                                                                        | 9.472(2)                                                                                                                     | 21.533(4)                                                                                                        | 23.800(5)                                                                                                           |
| $\alpha$ / °                                                  | 90                                                                                                                           | 90                                                                                                               | 90                                                                                                               | 90                                                                                                               | 90                                                                                                                           | 90                                                                                                               | 90                                                                                                                  |
| $\beta$ / °                                                   | 98.76(3)                                                                                                                     | 90.27(3)                                                                                                         | 94.19(3)                                                                                                         | 93.440(1)                                                                                                        | 93.83(3)                                                                                                                     | 92.48(3)                                                                                                         | 98.46(1)                                                                                                            |
| $\gamma$ / °                                                  | 90                                                                                                                           | 90                                                                                                               | 90                                                                                                               | 90                                                                                                               | 90                                                                                                                           | 90                                                                                                               | 90                                                                                                                  |
| Unit-cell volume / Å <sup>3</sup>                             | 1608.0(6)                                                                                                                    | 1693.2(6)                                                                                                        | 1775.9(10)                                                                                                       | 1760.2(9)                                                                                                        | 1668.5(6)                                                                                                                    | 1832.2(6)                                                                                                        | 3045.2(11)                                                                                                          |
| Z                                                             | 4                                                                                                                            | 4                                                                                                                | 4                                                                                                                | 4                                                                                                                | 4                                                                                                                            | 4                                                                                                                | 4                                                                                                                   |
| Calc. density / g cm <sup>-3</sup>                            | 1.410                                                                                                                        | 1.387                                                                                                            | 1.322                                                                                                            | 1.387                                                                                                            | 1.415                                                                                                                        | 1.332                                                                                                            | 1.389                                                                                                               |
| <i>F</i> (000)                                                | 712                                                                                                                          | 744                                                                                                              | 744                                                                                                              | 776                                                                                                              | 744                                                                                                                          | 776                                                                                                              | 1336                                                                                                                |
| Radiation type                                                | Mo K $\alpha$                                                                                                                | Mo K $\alpha$                                                                                                    | Mo K $\alpha$                                                                                                    | Cu K $\alpha$                                                                                                    | Cu K $\alpha$                                                                                                                | Mo K $\alpha$                                                                                                    | Cu K $\alpha$                                                                                                       |
| Absorption coefficient / mm <sup>-1</sup>                     | 0.351                                                                                                                        | 0.332                                                                                                            | 0.316                                                                                                            | 2.914                                                                                                            | 3.103                                                                                                                        | 0.309                                                                                                            | 3.257                                                                                                               |
| Crystal size / mm <sup>3</sup>                                | 0.30 x 0.10 x 0.10                                                                                                           | 0.30 x 0.30 x 0.30                                                                                               | 0.20 x 0.20 x 0.20                                                                                               | 0.30 x 0.10 x 0.10                                                                                               | 0.20 x 0.20 x 0.20                                                                                                           | 0.30 x 0.10 x 0.10                                                                                               | 0.30 x 0.30 x 0.30                                                                                                  |
| 2 $\theta$ range / °                                          | 6.04-60.99                                                                                                                   | 4.81-50.05                                                                                                       | 3.67-41.62                                                                                                       | 8.02-94.27                                                                                                       | 8.43-133.18                                                                                                                  | 4.92-43.93                                                                                                       | 7.08-114.37                                                                                                         |
| Completeness to max 2 $\theta$                                | 0.972                                                                                                                        | 0.996                                                                                                            | 0.971                                                                                                            | 0.903                                                                                                            | 0.935                                                                                                                        | 0.999                                                                                                            | 0.726                                                                                                               |
| No. of reflections measured                                   | 9351                                                                                                                         | 13217                                                                                                            | 5034                                                                                                             | 1473                                                                                                             | 2941                                                                                                                         | 15682                                                                                                            | 3082                                                                                                                |
| No. of independent reflections                                | 4773                                                                                                                         | 2980                                                                                                             | 1803                                                                                                             | 1428                                                                                                             | 2751                                                                                                                         | 2226                                                                                                             | 2999                                                                                                                |
| <i>R</i> (int)                                                | 0.0435                                                                                                                       | 0.0666                                                                                                           | 0.1050                                                                                                           | 0.0248                                                                                                           | 0.0398                                                                                                                       | 0.1329                                                                                                           | 0.1543                                                                                                              |
| No. parameters / restraints                                   | 221 / 17                                                                                                                     | 272 / 55                                                                                                         | 169 / 15                                                                                                         | 178 / 0                                                                                                          | 253 / 54                                                                                                                     | 218 / 0                                                                                                          | 370 / 0                                                                                                             |
| Final <i>R</i> 1 values [ <i>I</i> > 2 $\sigma$ ( <i>I</i> )] | 0.0534                                                                                                                       | 0.0493                                                                                                           | 0.0832                                                                                                           | 0.1159                                                                                                           | 0.0494                                                                                                                       | 0.0494                                                                                                           | 0.0691                                                                                                              |
| Final <i>wR</i> ( <i>F</i> <sup>2</sup> ) values (all data)   | 0.1381                                                                                                                       | 0.1359                                                                                                           | 0.2309                                                                                                           | 0.2878                                                                                                           | 0.1265                                                                                                                       | 0.1220                                                                                                           | 0.1863                                                                                                              |
| Goodness-of-fit on <i>F</i> <sup>2</sup>                      | 1.029                                                                                                                        | 1.031                                                                                                            | 0.818                                                                                                            | 1.124                                                                                                            | 0.968                                                                                                                        | 1.035                                                                                                            | 0.918                                                                                                               |
| Largest difference peak & hole / e Å <sup>-3</sup>            | 0.498, -0.294                                                                                                                | 0.344, -0.371                                                                                                    | 0.487, -0.375                                                                                                    | 0.879, -0.632                                                                                                    | 0.236, -0.273                                                                                                                | 0.190, -0.302                                                                                                    | 0.465, -0.412                                                                                                       |

## The extensive solid-form landscape of sulfathiazole: geometrical similarity and interaction energies

David S. Hughes, Ann L. Bingham, Michael B. Hursthouse, Terry L. Threlfall and Andrew D. Bond

### S2. Crystallographic information for the new crystal structures

|                                                               | 21                                                                                                           | 22                                                                                                                           | 23                                                                                                                                 | 24                                                                                                               | 25                                                                                                           | 26                                                                                                                              | 27                                                                                                                            |
|---------------------------------------------------------------|--------------------------------------------------------------------------------------------------------------|------------------------------------------------------------------------------------------------------------------------------|------------------------------------------------------------------------------------------------------------------------------------|------------------------------------------------------------------------------------------------------------------|--------------------------------------------------------------------------------------------------------------|---------------------------------------------------------------------------------------------------------------------------------|-------------------------------------------------------------------------------------------------------------------------------|
| CCDC number                                                   | 2120803                                                                                                      | 2120800                                                                                                                      | 2120784                                                                                                                            | 2120785                                                                                                          | 2120786                                                                                                      | 2120792                                                                                                                         | 2120799                                                                                                                       |
| Moiety formula                                                | C <sub>9</sub> H <sub>9</sub> N <sub>3</sub> O <sub>2</sub> S <sub>2</sub> , C <sub>5</sub> H <sub>8</sub> O | C <sub>9</sub> H <sub>9</sub> N <sub>3</sub> O <sub>2</sub> S <sub>2</sub> ,<br>C <sub>5</sub> H <sub>8</sub> O <sub>2</sub> | 2(C <sub>9</sub> H <sub>9</sub> N <sub>3</sub> O <sub>2</sub> S <sub>2</sub> ),<br>C <sub>6</sub> H <sub>12</sub> N <sub>2</sub> O | C <sub>9</sub> H <sub>9</sub> N <sub>3</sub> O <sub>2</sub> S <sub>2</sub> ,<br>C <sub>5</sub> H <sub>10</sub> O | C <sub>9</sub> H <sub>9</sub> N <sub>3</sub> O <sub>2</sub> S <sub>2</sub> , C <sub>4</sub> H <sub>8</sub> O | C <sub>9</sub> H <sub>9</sub> N <sub>3</sub> O <sub>2</sub> S <sub>2</sub> ,<br>C <sub>6</sub> H <sub>15</sub> O <sub>4</sub> P | C <sub>9</sub> H <sub>9</sub> N <sub>3</sub> O <sub>2</sub> S <sub>2</sub> ,<br>C <sub>7</sub> H <sub>12</sub> O <sub>4</sub> |
| Total formula                                                 | C <sub>14</sub> H <sub>17</sub> N <sub>3</sub> O <sub>3</sub> S <sub>2</sub>                                 | C <sub>14</sub> H <sub>17</sub> N <sub>3</sub> O <sub>4</sub> S <sub>2</sub>                                                 | C <sub>24</sub> H <sub>30</sub> N <sub>6</sub> O <sub>5</sub> S <sub>4</sub>                                                       | C <sub>14</sub> H <sub>19</sub> N <sub>3</sub> O <sub>3</sub> S <sub>2</sub>                                     | C <sub>13</sub> H <sub>17</sub> N <sub>3</sub> O <sub>3</sub> S <sub>2</sub>                                 | C <sub>15</sub> H <sub>24</sub> N <sub>3</sub> O <sub>6</sub> PS <sub>2</sub>                                                   | C <sub>16</sub> H <sub>21</sub> N <sub>3</sub> O <sub>6</sub> S <sub>2</sub>                                                  |
| Formula weight                                                | 339.42                                                                                                       | 355.42                                                                                                                       | 638.80                                                                                                                             | 341.44                                                                                                           | 327.41                                                                                                       | 437.46                                                                                                                          | 415.48                                                                                                                        |
| Temperature / K                                               | 293(2)                                                                                                       | 293(2)                                                                                                                       | 293(2)                                                                                                                             | 293(2)                                                                                                           | 150(2)                                                                                                       | 150(2)                                                                                                                          | 150(2)                                                                                                                        |
| Crystal system                                                | monoclinic                                                                                                   | monoclinic                                                                                                                   | monoclinic                                                                                                                         | monoclinic                                                                                                       | orthorhombic                                                                                                 | orthorhombic                                                                                                                    | orthorhombic                                                                                                                  |
| Space group                                                   | P 21/n                                                                                                       | P 21/n                                                                                                                       | P 21/n                                                                                                                             | C 2/c                                                                                                            | P 21 21 21                                                                                                   | A b a 2                                                                                                                         | P b c a                                                                                                                       |
| <i>a</i> / Å                                                  | 8.454(1)                                                                                                     | 8.583(1)                                                                                                                     | 16.533(3)                                                                                                                          | 20.705(4)                                                                                                        | 9.515(2)                                                                                                     | 19.639(4)                                                                                                                       | 20.406(4)                                                                                                                     |
| <i>b</i> / Å                                                  | 20.699(2)                                                                                                    | 20.652(2)                                                                                                                    | 9.996(1)                                                                                                                           | 11.385(2)                                                                                                        | 16.675(3)                                                                                                    | 8.864(2)                                                                                                                        | 9.016(2)                                                                                                                      |
| <i>c</i> / Å                                                  | 9.487(1)                                                                                                     | 9.520(4)                                                                                                                     | 19.810(2)                                                                                                                          | 14.136(3)                                                                                                        | 19.249(4)                                                                                                    | 24.612(5)                                                                                                                       | 20.494(4)                                                                                                                     |
| $\alpha$ / °                                                  | 90                                                                                                           | 90                                                                                                                           | 90                                                                                                                                 | 90                                                                                                               | 90                                                                                                           | 90                                                                                                                              | 90                                                                                                                            |
| $\beta$ / °                                                   | 92.37(1)                                                                                                     | 93.66(3)                                                                                                                     | 112.26(2)                                                                                                                          | 99.02(3)                                                                                                         | 90                                                                                                           | 90                                                                                                                              | 90                                                                                                                            |
| $\gamma$ / °                                                  | 90                                                                                                           | 90                                                                                                                           | 90                                                                                                                                 | 90                                                                                                               | 90                                                                                                           | 90                                                                                                                              | 90                                                                                                                            |
| Unit-cell volume / Å <sup>3</sup>                             | 1658.7(3)                                                                                                    | 1684.0(8)                                                                                                                    | 3029.9(8)                                                                                                                          | 3291.0(11)                                                                                                       | 3054.1(11)                                                                                                   | 4284.5(16)                                                                                                                      | 3770.5(13)                                                                                                                    |
| <i>Z</i>                                                      | 4                                                                                                            | 4                                                                                                                            | 4                                                                                                                                  | 8                                                                                                                | 8                                                                                                            | 8                                                                                                                               | 8                                                                                                                             |
| Calc. density / g cm <sup>-3</sup>                            | 1.359                                                                                                        | 1.402                                                                                                                        | 1.400                                                                                                                              | 1.378                                                                                                            | 1.424                                                                                                        | 1.356                                                                                                                           | 1.464                                                                                                                         |
| <i>F</i> (000)                                                | 712                                                                                                          | 744                                                                                                                          | 1336                                                                                                                               | 1440                                                                                                             | 1376                                                                                                         | 1840                                                                                                                            | 1744                                                                                                                          |
| Radiation type                                                | Cu K $\alpha$                                                                                                | Cu K $\alpha$                                                                                                                | Cu K $\alpha$                                                                                                                      | Cu K $\alpha$                                                                                                    | Mo K $\alpha$                                                                                                | Mo K $\alpha$                                                                                                                   | Mo K $\alpha$                                                                                                                 |
| Absorption coefficient / mm <sup>-1</sup>                     | 3.048                                                                                                        | 3.075                                                                                                                        | 3.295                                                                                                                              | 3.073                                                                                                            | 0.362                                                                                                        | 0.358                                                                                                                           | 0.321                                                                                                                         |
| Crystal size / mm <sup>3</sup>                                | 0.30 x 0.30 x 0.30                                                                                           | 0.30 x 0.10 x 0.10                                                                                                           | 0.30 x 0.30 x 0.30                                                                                                                 | 0.30 x 0.10 x 0.10                                                                                               | 0.20 x 0.20 x 0.20                                                                                           | 0.20 x 0.20 x 0.15                                                                                                              | 0.30 x 0.10 x 0.10                                                                                                            |
| 2 $\theta$ range / °                                          | 8.54-148.48                                                                                                  | 8.56-108.47                                                                                                                  | 5.96-148.42                                                                                                                        | 8.89-133.09                                                                                                      | 3.23-61.03                                                                                                   | 4.15-54.96                                                                                                                      | 3.97-43.91                                                                                                                    |
| Completeness to max 2 $\theta$                                | 0.968                                                                                                        | 1.000                                                                                                                        | 0.969                                                                                                                              | 0.923                                                                                                            | 0.967                                                                                                        | 0.984                                                                                                                           | 0.984                                                                                                                         |
| No. of reflections measured                                   | 3468                                                                                                         | 2205                                                                                                                         | 6197                                                                                                                               | 2756                                                                                                             | 20973                                                                                                        | 19195                                                                                                                           | 12363                                                                                                                         |
| No. of independent reflections                                | 3275                                                                                                         | 2047                                                                                                                         | 5994                                                                                                                               | 2682                                                                                                             | 8806                                                                                                         | 4688                                                                                                                            | 2266                                                                                                                          |
| <i>R</i> (int)                                                | 0.0141                                                                                                       | 0.0297                                                                                                                       | 0.0232                                                                                                                             | 0.0335                                                                                                           | 0.0576                                                                                                       | 0.0705                                                                                                                          | 0.1350                                                                                                                        |
| No. parameters / restraints                                   | 207 / 3                                                                                                      | 263 / 111                                                                                                                    | 386 / 6                                                                                                                            | 199 / 0                                                                                                          | 393 / 6                                                                                                      | 281 / 7                                                                                                                         | 251 / 3                                                                                                                       |
| Final <i>R</i> 1 values [ <i>I</i> > 2 $\sigma$ ( <i>I</i> )] | 0.0538                                                                                                       | 0.0687                                                                                                                       | 0.0493                                                                                                                             | 0.0479                                                                                                           | 0.0456                                                                                                       | 0.0451                                                                                                                          | 0.0446                                                                                                                        |
| Final <i>wR</i> ( <i>F</i> <sup>2</sup> ) values (all data)   | 0.1658                                                                                                       | 0.2147                                                                                                                       | 0.1536                                                                                                                             | 0.1266                                                                                                           | 0.0987                                                                                                       | 0.1059                                                                                                                          | 0.0873                                                                                                                        |
| Goodness-of-fit on <i>F</i> <sup>2</sup>                      | 1.127                                                                                                        | 1.026                                                                                                                        | 1.097                                                                                                                              | 1.004                                                                                                            | 1.018                                                                                                        | 0.994                                                                                                                           | 0.762                                                                                                                         |
| Largest difference peak & hole / e Å <sup>-3</sup>            | 0.308, -0.265                                                                                                | 0.260, -0.306                                                                                                                | 0.276, -0.406                                                                                                                      | 0.232, -0.344                                                                                                    | 0.372, -0.407                                                                                                | 0.456, -0.389                                                                                                                   | 0.292, -0.314                                                                                                                 |
| Flack parameter                                               |                                                                                                              |                                                                                                                              |                                                                                                                                    |                                                                                                                  | 0.46(7) [inv. twin]                                                                                          | -0.04(5)                                                                                                                        |                                                                                                                               |

## The extensive solid-form landscape of sulfathiazole: geometrical similarity and interaction energies

David S. Hughes, Ann L. Bingham, Michael B. Hursthouse, Terry L. Threlfall and Andrew D. Bond

### S2. Crystallographic information for the new crystal structures

|                                                               | 28                                                                                                                            | 29                                                                                                                             | 30                                                                                                                             | 31                                                                                                           | 32                                                                                                           | 33                                                                                                            |
|---------------------------------------------------------------|-------------------------------------------------------------------------------------------------------------------------------|--------------------------------------------------------------------------------------------------------------------------------|--------------------------------------------------------------------------------------------------------------------------------|--------------------------------------------------------------------------------------------------------------|--------------------------------------------------------------------------------------------------------------|---------------------------------------------------------------------------------------------------------------|
| CCDC number                                                   | 2120789                                                                                                                       | 2120790                                                                                                                        | 2120791                                                                                                                        | 2120793                                                                                                      | 2120794                                                                                                      | 2120807                                                                                                       |
| Moiety formula                                                | 2(C <sub>9</sub> H <sub>9</sub> N <sub>3</sub> O <sub>2</sub> S <sub>2</sub> ), C <sub>8</sub> H <sub>12</sub> N <sub>2</sub> | 2(C <sub>9</sub> H <sub>9</sub> N <sub>3</sub> O <sub>2</sub> S <sub>2</sub> ), C <sub>10</sub> H <sub>16</sub> N <sub>2</sub> | 2(C <sub>9</sub> H <sub>9</sub> N <sub>3</sub> O <sub>2</sub> S <sub>2</sub> ), C <sub>12</sub> H <sub>20</sub> N <sub>2</sub> | C <sub>9</sub> H <sub>9</sub> N <sub>3</sub> O <sub>2</sub> S <sub>2</sub> , C <sub>4</sub> H <sub>7</sub> N | C <sub>9</sub> H <sub>9</sub> N <sub>3</sub> O <sub>2</sub> S <sub>2</sub> , C <sub>5</sub> H <sub>9</sub> N | C <sub>9</sub> H <sub>9</sub> N <sub>3</sub> O <sub>2</sub> S <sub>2</sub> , C <sub>7</sub> H <sub>11</sub> N |
| Total formula                                                 | C <sub>26</sub> H <sub>30</sub> N <sub>8</sub> O <sub>4</sub> S <sub>4</sub>                                                  | C <sub>28</sub> H <sub>34</sub> N <sub>8</sub> O <sub>4</sub> S <sub>4</sub>                                                   | C <sub>30</sub> H <sub>38</sub> N <sub>8</sub> O <sub>4</sub> S <sub>4</sub>                                                   | C <sub>13</sub> H <sub>16</sub> N <sub>4</sub> O <sub>2</sub> S <sub>2</sub>                                 | C <sub>14</sub> H <sub>18</sub> N <sub>4</sub> O <sub>2</sub> S <sub>2</sub>                                 | C <sub>16</sub> H <sub>20</sub> N <sub>4</sub> O <sub>2</sub> S <sub>2</sub>                                  |
| Formula weight                                                | 646.82                                                                                                                        | 674.87                                                                                                                         | 702.92                                                                                                                         | 324.42                                                                                                       | 338.44                                                                                                       | 364.48                                                                                                        |
| Temperature / K                                               | 150(2)                                                                                                                        | 150(2)                                                                                                                         | 120(2)                                                                                                                         | 150(2)                                                                                                       | 120(2)                                                                                                       | 293(2)                                                                                                        |
| Crystal system                                                | monoclinic                                                                                                                    | monoclinic                                                                                                                     | monoclinic                                                                                                                     | monoclinic                                                                                                   | monoclinic                                                                                                   | monoclinic                                                                                                    |
| Space group                                                   | P 21/n                                                                                                                        | P 21/n                                                                                                                         | P 21/n                                                                                                                         | P 21/n                                                                                                       | P 21/n                                                                                                       | P 21/n                                                                                                        |
| <i>a</i> / Å                                                  | 8.010(2)                                                                                                                      | 8.523(2)                                                                                                                       | 8.6785(2)                                                                                                                      | 8.2478(2)                                                                                                    | 8.4758(3)                                                                                                    | 9.112(2)                                                                                                      |
| <i>b</i> / Å                                                  | 20.820(4)                                                                                                                     | 21.073(4)                                                                                                                      | 19.9110(6)                                                                                                                     | 21.0191(6)                                                                                                   | 20.7179(9)                                                                                                   | 18.994(4)                                                                                                     |
| <i>c</i> / Å                                                  | 8.990(2)                                                                                                                      | 9.087(2)                                                                                                                       | 10.0217(3)                                                                                                                     | 9.0739(3)                                                                                                    | 9.6108(5)                                                                                                    | 10.590(2)                                                                                                     |
| $\alpha$ / °                                                  | 90                                                                                                                            | 90                                                                                                                             | 90                                                                                                                             | 90                                                                                                           | 90                                                                                                           | 90                                                                                                            |
| $\beta$ / °                                                   | 94.65(3)                                                                                                                      | 96.54(3)                                                                                                                       | 97.776(1)                                                                                                                      | 96.534(1)                                                                                                    | 97.840(2)                                                                                                    | 101.37(3)                                                                                                     |
| $\gamma$ / °                                                  | 90                                                                                                                            | 90                                                                                                                             | 90                                                                                                                             | 90                                                                                                           | 90                                                                                                           | 90                                                                                                            |
| Unit-cell volume / Å <sup>3</sup>                             | 1494.3(6)                                                                                                                     | 1621.5(6)                                                                                                                      | 1715.80(8)                                                                                                                     | 1562.85(8)                                                                                                   | 1671.89(13)                                                                                                  | 1796.9(7)                                                                                                     |
| <i>Z</i>                                                      | 2                                                                                                                             | 2                                                                                                                              | 2                                                                                                                              | 4                                                                                                            | 4                                                                                                            | 4                                                                                                             |
| Calc. density / g cm <sup>-3</sup>                            | 1.438                                                                                                                         | 1.382                                                                                                                          | 1.361                                                                                                                          | 1.379                                                                                                        | 1.345                                                                                                        | 1.347                                                                                                         |
| <i>F</i> (000)                                                | 676                                                                                                                           | 708                                                                                                                            | 740                                                                                                                            | 680                                                                                                          | 712                                                                                                          | 768                                                                                                           |
| Radiation type                                                | Mo K $\alpha$                                                                                                                 | Mo K $\alpha$                                                                                                                  | Mo K $\alpha$                                                                                                                  | Mo K $\alpha$                                                                                                | Mo K $\alpha$                                                                                                | Cu K $\alpha$                                                                                                 |
| Absorption coefficient / mm <sup>-1</sup>                     | 0.366                                                                                                                         | 0.340                                                                                                                          | 0.324                                                                                                                          | 0.350                                                                                                        | 0.330                                                                                                        | 2.825                                                                                                         |
| Crystal size / mm <sup>3</sup>                                | 0.20 x 0.15 x 0.02                                                                                                            | 0.15 x 0.10 x 0.02                                                                                                             | 0.15 x 0.10 x 0.02                                                                                                             | 0.30 x 0.25 x 0.02                                                                                           | 0.30 x 0.25 x 0.02                                                                                           | 0.30 x 0.20 x 0.10                                                                                            |
| 2 $\theta$ range / °                                          | 7.11-43.08                                                                                                                    | 7.23-61.13                                                                                                                     | 7.13-54.97                                                                                                                     | 7.09-60.63                                                                                                   | 7.17-50.05                                                                                                   | 16.40-108.46                                                                                                  |
| Completeness to max 2 $\theta$                                | 0.931                                                                                                                         | 0.858                                                                                                                          | 0.988                                                                                                                          | 0.832                                                                                                        | 0.995                                                                                                        | 0.907                                                                                                         |
| No. of reflections measured                                   | 4276                                                                                                                          | 13649                                                                                                                          | 12957                                                                                                                          | 9149                                                                                                         | 11011                                                                                                        | 2116                                                                                                          |
| No. of independent reflections                                | 1607                                                                                                                          | 4261                                                                                                                           | 3882                                                                                                                           | 3897                                                                                                         | 2937                                                                                                         | 1983                                                                                                          |
| <i>R</i> (int)                                                | 0.0435                                                                                                                        | 0.0596                                                                                                                         | 0.0672                                                                                                                         | 0.0471                                                                                                       | 0.1204                                                                                                       | 0.0584                                                                                                        |
| No. parameters / restraints                                   | 203 / 3                                                                                                                       | 212 / 3                                                                                                                        | 221 / 3                                                                                                                        | 204 / 3                                                                                                      | 233 / 15                                                                                                     | 217 / 0                                                                                                       |
| Final <i>R</i> 1 values [ <i>I</i> > 2 $\sigma$ ( <i>I</i> )] | 0.0391                                                                                                                        | 0.0495                                                                                                                         | 0.0397                                                                                                                         | 0.0537                                                                                                       | 0.0509                                                                                                       | 0.0585                                                                                                        |
| Final <i>wR</i> ( <i>F</i> <sup>2</sup> ) values (all data)   | 0.0930                                                                                                                        | 0.1188                                                                                                                         | 0.1035                                                                                                                         | 0.1486                                                                                                       | 0.1250                                                                                                       | 0.1602                                                                                                        |
| Goodness-of-fit on <i>F</i> <sup>2</sup>                      | 1.072                                                                                                                         | 0.988                                                                                                                          | 1.023                                                                                                                          | 1.041                                                                                                        | 0.978                                                                                                        | 0.922                                                                                                         |
| Largest difference peak & hole / e Å <sup>-3</sup>            | 0.227, -0.320                                                                                                                 | 0.251, -0.424                                                                                                                  | 0.262, -0.458                                                                                                                  | 0.365, -0.566                                                                                                | 0.251, -0.414                                                                                                | 0.275, -0.378                                                                                                 |

## The extensive solid-form landscape of sulfathiazole: geometrical similarity and interaction energies

David S. Hughes, Ann L. Bingham, Michael B. Hursthouse, Terry L. Threlfall and Andrew D. Bond

### S2. Crystallographic information for the new crystal structures

|                                                               | 34                                                                                                                             | 35                                                                                                                               | 36                                                                                                                              | 37                                                                                                                        | 38                                                                                                               | 39                                                                                                           | 40                                                                                                           |
|---------------------------------------------------------------|--------------------------------------------------------------------------------------------------------------------------------|----------------------------------------------------------------------------------------------------------------------------------|---------------------------------------------------------------------------------------------------------------------------------|---------------------------------------------------------------------------------------------------------------------------|------------------------------------------------------------------------------------------------------------------|--------------------------------------------------------------------------------------------------------------|--------------------------------------------------------------------------------------------------------------|
| CCDC number                                                   | 2120795                                                                                                                        | 2120796                                                                                                                          | 2120797                                                                                                                         | 2120798                                                                                                                   | 2120804                                                                                                          | 2120805                                                                                                      | 2120802                                                                                                      |
| Moiety formula                                                | C <sub>9</sub> H <sub>9</sub> N <sub>3</sub> O <sub>2</sub> S <sub>2</sub> ,<br>C <sub>5</sub> H <sub>8</sub> N <sub>2</sub> O | 2(C <sub>9</sub> H <sub>9</sub> N <sub>3</sub> O <sub>2</sub> S <sub>2</sub> ),<br>C <sub>9</sub> H <sub>14</sub> N <sub>2</sub> | 2(C <sub>9</sub> H <sub>9</sub> N <sub>3</sub> O <sub>2</sub> S <sub>2</sub> ),<br>C <sub>6</sub> H <sub>8</sub> N <sub>2</sub> | C <sub>9</sub> H <sub>9</sub> N <sub>3</sub> O <sub>2</sub> S <sub>2</sub> , C <sub>4</sub> H <sub>4</sub> N <sub>2</sub> | C <sub>9</sub> H <sub>9</sub> N <sub>3</sub> O <sub>2</sub> S <sub>2</sub> ,<br>C <sub>4</sub> H <sub>5</sub> NS | C <sub>9</sub> H <sub>9</sub> N <sub>3</sub> O <sub>2</sub> S <sub>2</sub> , C <sub>3</sub> H <sub>5</sub> N | C <sub>9</sub> H <sub>9</sub> N <sub>3</sub> O <sub>2</sub> S <sub>2</sub> , C <sub>4</sub> H <sub>5</sub> N |
| Total formula                                                 | C <sub>14</sub> H <sub>17</sub> N <sub>5</sub> O <sub>3</sub> S <sub>2</sub>                                                   | C <sub>27</sub> H <sub>32</sub> N <sub>8</sub> O <sub>4</sub> S <sub>4</sub>                                                     | C <sub>24</sub> H <sub>26</sub> N <sub>8</sub> O <sub>4</sub> S <sub>4</sub>                                                    | C <sub>13</sub> H <sub>13</sub> N <sub>5</sub> O <sub>2</sub> S <sub>2</sub>                                              | C <sub>13</sub> H <sub>14</sub> N <sub>4</sub> O <sub>2</sub> S <sub>3</sub>                                     | C <sub>12</sub> H <sub>14</sub> N <sub>4</sub> O <sub>2</sub> S <sub>2</sub>                                 | C <sub>13</sub> H <sub>14</sub> N <sub>4</sub> O <sub>2</sub> S <sub>2</sub>                                 |
| Formula weight                                                | 367.44                                                                                                                         | 660.84                                                                                                                           | 618.77                                                                                                                          | 335.40                                                                                                                    | 354.46                                                                                                           | 310.39                                                                                                       | 322.40                                                                                                       |
| Temperature / K                                               | 120(2)                                                                                                                         | 150(2)                                                                                                                           | 150(2)                                                                                                                          | 150(2)                                                                                                                    | 150(2)                                                                                                           | 150(2)                                                                                                       | 150(2)                                                                                                       |
| Crystal system                                                | monoclinic                                                                                                                     | monoclinic                                                                                                                       | monoclinic                                                                                                                      | monoclinic                                                                                                                | monoclinic                                                                                                       | orthorhombic                                                                                                 | orthorhombic                                                                                                 |
| Space group                                                   | P 21/n                                                                                                                         | P 21/n                                                                                                                           | P 21/c                                                                                                                          | P 21/c                                                                                                                    | P 21/c                                                                                                           | P b c a                                                                                                      | P b c a                                                                                                      |
| <i>a</i> / Å                                                  | 8.3551(9)                                                                                                                      | 8.3630(17)                                                                                                                       | 8.154(2)                                                                                                                        | 8.390(2)                                                                                                                  | 8.167(2)                                                                                                         | 9.045(2)                                                                                                     | 9.179(2)                                                                                                     |
| <i>b</i> / Å                                                  | 18.880(3)                                                                                                                      | 21.146(4)                                                                                                                        | 17.399(3)                                                                                                                       | 18.813(4)                                                                                                                 | 12.443(2)                                                                                                        | 16.864(3)                                                                                                    | 16.907(3)                                                                                                    |
| <i>c</i> / Å                                                  | 10.7764(17)                                                                                                                    | 9.1160(18)                                                                                                                       | 10.077(2)                                                                                                                       | 9.540(2)                                                                                                                  | 15.632(3)                                                                                                        | 39.421(8)                                                                                                    | 39.202(8)                                                                                                    |
| $\alpha$ / °                                                  | 90                                                                                                                             | 90                                                                                                                               | 90                                                                                                                              | 90                                                                                                                        | 90                                                                                                               | 90                                                                                                           | 90                                                                                                           |
| $\beta$ / °                                                   | 96.790(9)                                                                                                                      | 95.76(3)                                                                                                                         | 101.32(3)                                                                                                                       | 102.54(3)                                                                                                                 | 96.88(3)                                                                                                         | 90                                                                                                           | 90                                                                                                           |
| $\gamma$ / °                                                  | 90                                                                                                                             | 90                                                                                                                               | 90                                                                                                                              | 90                                                                                                                        | 90                                                                                                               | 90                                                                                                           | 90                                                                                                           |
| Unit-cell volume / Å <sup>3</sup>                             | 1688.0(4)                                                                                                                      | 1604.0(6)                                                                                                                        | 1401.8(5)                                                                                                                       | 1469.9(6)                                                                                                                 | 1577.1(6)                                                                                                        | 6013(2)                                                                                                      | 6084(2)                                                                                                      |
| <i>Z</i>                                                      | 4                                                                                                                              | 2                                                                                                                                | 2                                                                                                                               | 4                                                                                                                         | 4                                                                                                                | 16                                                                                                           | 16                                                                                                           |
| Calc. density / g cm <sup>-3</sup>                            | 1.446                                                                                                                          | 1.368                                                                                                                            | 1.466                                                                                                                           | 1.516                                                                                                                     | 1.493                                                                                                            | 1.371                                                                                                        | 1.408                                                                                                        |
| <i>F</i> (000)                                                | 768                                                                                                                            | 692                                                                                                                              | 644                                                                                                                             | 696                                                                                                                       | 736                                                                                                              | 2592                                                                                                         | 2688                                                                                                         |
| Radiation type                                                | Mo K $\alpha$                                                                                                                  | Mo K $\alpha$                                                                                                                    | Mo K $\alpha$                                                                                                                   | Mo K $\alpha$                                                                                                             | Mo K $\alpha$                                                                                                    | Mo K $\alpha$                                                                                                | Mo K $\alpha$                                                                                                |
| Absorption coefficient / mm <sup>-1</sup>                     | 0.339                                                                                                                          | 0.342                                                                                                                            | 0.386                                                                                                                           | 0.377                                                                                                                     | 0.481                                                                                                            | 0.360                                                                                                        | 0.359                                                                                                        |
| Crystal size / mm <sup>3</sup>                                | 0.30 x 0.20 x 0.10                                                                                                             | 0.20 x 0.20 x 0.20                                                                                                               | 0.20 x 0.20 x 0.20                                                                                                              | 0.35 x 0.20 x 0.20                                                                                                        | 0.20 x 0.20 x 0.20                                                                                               | 0.20 x 0.20 x 0.20                                                                                           | 0.20 x 0.20 x 0.20                                                                                           |
| 2 $\theta$ range / °                                          | 7.27-55.01                                                                                                                     | 7.23-50.05                                                                                                                       | 7.53-50.03                                                                                                                      | 7.29-61.03                                                                                                                | 7.06-50.09                                                                                                       | 7.08-50.08                                                                                                   | 4.82-49.82                                                                                                   |
| Completeness to max 2 $\theta$                                | 0.985                                                                                                                          | 0.980                                                                                                                            | 0.996                                                                                                                           | 0.993                                                                                                                     | 0.991                                                                                                            | 0.950                                                                                                        | 0.850                                                                                                        |
| No. of reflections measured                                   | 15509                                                                                                                          | 8090                                                                                                                             | 12559                                                                                                                           | 38391                                                                                                                     | 10089                                                                                                            | 21487                                                                                                        | 17034                                                                                                        |
| No. of independent reflections                                | 3826                                                                                                                           | 2768                                                                                                                             | 2466                                                                                                                            | 4455                                                                                                                      | 2770                                                                                                             | 5055                                                                                                         | 4506                                                                                                         |
| <i>R</i> (int)                                                | 0.1556                                                                                                                         | 0.0560                                                                                                                           | 0.0370                                                                                                                          | 0.0378                                                                                                                    | 0.0913                                                                                                           | 0.0881                                                                                                       | 0.0964                                                                                                       |
| No. parameters / restraints                                   | 226 / 3                                                                                                                        | 208 / 17                                                                                                                         | 194 / 3                                                                                                                         | 212 / 3                                                                                                                   | 213 / 3                                                                                                          | 363 / 0                                                                                                      | 379 / 8                                                                                                      |
| Final <i>R</i> 1 values [ <i>I</i> > 2 $\sigma$ ( <i>I</i> )] | 0.0611                                                                                                                         | 0.1259                                                                                                                           | 0.0331                                                                                                                          | 0.0360                                                                                                                    | 0.0458                                                                                                           | 0.0548                                                                                                       | 0.0446                                                                                                       |
| Final <i>wR</i> ( <i>F</i> <sup>2</sup> ) values (all data)   | 0.1436                                                                                                                         | 0.3033                                                                                                                           | 0.0864                                                                                                                          | 0.0964                                                                                                                    | 0.1092                                                                                                           | 0.1368                                                                                                       | 0.0803                                                                                                       |
| Goodness-of-fit on <i>F</i> <sup>2</sup>                      | 0.933                                                                                                                          | 1.216                                                                                                                            | 1.057                                                                                                                           | 1.042                                                                                                                     | 0.979                                                                                                            | 1.000                                                                                                        | 0.660                                                                                                        |
| Largest difference peak & hole / e Å <sup>-3</sup>            | 0.352, -0.337                                                                                                                  | 0.519, -0.686                                                                                                                    | 0.251, -0.397                                                                                                                   | 0.357, -0.500                                                                                                             | 0.308, -0.394                                                                                                    | 0.593, -0.389                                                                                                | 0.596, -0.362                                                                                                |

## The extensive solid-form landscape of sulfathiazole: geometrical similarity and interaction energies

David S. Hughes, Ann L. Bingham, Michael B. Hursthouse, Terry L. Threlfall and Andrew D. Bond

### S2. Crystallographic information for the new crystal structures

|                                                               | 41                                                                                                                        | 60                                                                                                                                              | 61                                                                                                                                                            | 62                                                                                                                                              | 63                                                                                                                                               | 64                                                                                                                                                           |
|---------------------------------------------------------------|---------------------------------------------------------------------------------------------------------------------------|-------------------------------------------------------------------------------------------------------------------------------------------------|---------------------------------------------------------------------------------------------------------------------------------------------------------------|-------------------------------------------------------------------------------------------------------------------------------------------------|--------------------------------------------------------------------------------------------------------------------------------------------------|--------------------------------------------------------------------------------------------------------------------------------------------------------------|
| CCDC number                                                   | 2120819                                                                                                                   | 2120818                                                                                                                                         | 2120809                                                                                                                                                       | 2120808                                                                                                                                         | 2120814                                                                                                                                          | 2120812                                                                                                                                                      |
| Moiety formula                                                | C <sub>9</sub> H <sub>9</sub> N <sub>3</sub> O <sub>2</sub> S <sub>2</sub> , C <sub>5</sub> H <sub>8</sub> N <sub>2</sub> | [C <sub>9</sub> H <sub>8</sub> N <sub>3</sub> O <sub>2</sub> S <sub>2</sub> ] <sup>-</sup> ,<br>[C <sub>5</sub> H <sub>12</sub> N] <sup>+</sup> | [C <sub>9</sub> H <sub>8</sub> N <sub>3</sub> O <sub>2</sub> S <sub>2</sub> ] <sup>-</sup> ,<br>[C <sub>7</sub> H <sub>13</sub> N <sub>2</sub> ] <sup>+</sup> | [C <sub>9</sub> H <sub>8</sub> N <sub>3</sub> O <sub>2</sub> S <sub>2</sub> ] <sup>-</sup> ,<br>[C <sub>5</sub> H <sub>12</sub> N] <sup>+</sup> | [C <sub>9</sub> H <sub>8</sub> N <sub>3</sub> O <sub>2</sub> S <sub>2</sub> ] <sup>-</sup> ,<br>[C <sub>4</sub> H <sub>10</sub> NO] <sup>+</sup> | [C <sub>9</sub> H <sub>8</sub> N <sub>3</sub> O <sub>2</sub> S <sub>2</sub> ] <sup>-</sup> ,<br>[C <sub>4</sub> H <sub>9</sub> N <sub>2</sub> ] <sup>+</sup> |
| Total formula                                                 | C <sub>14</sub> H <sub>17</sub> N <sub>5</sub> O <sub>2</sub> S <sub>2</sub>                                              | C <sub>14</sub> H <sub>20</sub> N <sub>4</sub> O <sub>2</sub> S <sub>2</sub>                                                                    | C <sub>16</sub> H <sub>21</sub> N <sub>5</sub> O <sub>2</sub> S <sub>2</sub>                                                                                  | C <sub>14</sub> H <sub>20</sub> N <sub>4</sub> O <sub>2</sub> S <sub>2</sub>                                                                    | C <sub>13</sub> H <sub>18</sub> N <sub>4</sub> O <sub>3</sub> S <sub>2</sub>                                                                     | C <sub>13</sub> H <sub>17</sub> N <sub>5</sub> O <sub>2</sub> S <sub>2</sub>                                                                                 |
| Formula weight                                                | 351.44                                                                                                                    | 340.46                                                                                                                                          | 379.50                                                                                                                                                        | 340.46                                                                                                                                          | 342.43                                                                                                                                           | 339.43                                                                                                                                                       |
| Temperature / K                                               | 293(2)                                                                                                                    | 150(2)                                                                                                                                          | 150(2)                                                                                                                                                        | 150(2)                                                                                                                                          | 150(2)                                                                                                                                           | 150(2)                                                                                                                                                       |
| Crystal system                                                | monoclinic                                                                                                                | orthorhombic                                                                                                                                    | orthorhombic                                                                                                                                                  | orthorhombic                                                                                                                                    | orthorhombic                                                                                                                                     | orthorhombic                                                                                                                                                 |
| Space group                                                   | P 21/c                                                                                                                    | P n a 21                                                                                                                                        | P n a 21                                                                                                                                                      | P 21 21 21                                                                                                                                      | P 21 21 21                                                                                                                                       | F d d 2                                                                                                                                                      |
| <i>a</i> / Å                                                  | 12.213(3)                                                                                                                 | 13.943(3)                                                                                                                                       | 15.807(3)                                                                                                                                                     | 6.948(1)                                                                                                                                        | 6.592(1)                                                                                                                                         | 17.562(4)                                                                                                                                                    |
| <i>b</i> / Å                                                  | 20.550(5)                                                                                                                 | 9.260(2)                                                                                                                                        | 10.126(2)                                                                                                                                                     | 14.868(1)                                                                                                                                       | 15.155(3)                                                                                                                                        | 42.720(9)                                                                                                                                                    |
| <i>c</i> / Å                                                  | 13.583(3)                                                                                                                 | 12.698(3)                                                                                                                                       | 10.754(2)                                                                                                                                                     | 15.958(1)                                                                                                                                       | 15.689(3)                                                                                                                                        | 8.291(2)                                                                                                                                                     |
| $\alpha$ / °                                                  | 90                                                                                                                        | 90                                                                                                                                              | 90                                                                                                                                                            | 90                                                                                                                                              | 90                                                                                                                                               | 90                                                                                                                                                           |
| $\beta$ / °                                                   | 97.03(2)                                                                                                                  | 90                                                                                                                                              | 90                                                                                                                                                            | 90                                                                                                                                              | 90                                                                                                                                               | 90                                                                                                                                                           |
| $\gamma$ / °                                                  | 90                                                                                                                        | 90                                                                                                                                              | 90                                                                                                                                                            | 90                                                                                                                                              | 90                                                                                                                                               | 90                                                                                                                                                           |
| Unit-cell volume / Å <sup>3</sup>                             | 3383.4(14)                                                                                                                | 1639.5(6)                                                                                                                                       | 1721.3(6)                                                                                                                                                     | 1648.5(3)                                                                                                                                       | 1567.4(5)                                                                                                                                        | 6220(2)                                                                                                                                                      |
| Z                                                             | 8                                                                                                                         | 4                                                                                                                                               | 4                                                                                                                                                             | 4                                                                                                                                               | 4                                                                                                                                                | 16                                                                                                                                                           |
| Calc. density / g cm <sup>-3</sup>                            | 1.380                                                                                                                     | 1.379                                                                                                                                           | 1.464                                                                                                                                                         | 1.372                                                                                                                                           | 1.451                                                                                                                                            | 1.450                                                                                                                                                        |
| <i>F</i> (000)                                                | 1472                                                                                                                      | 720                                                                                                                                             | 800                                                                                                                                                           | 720                                                                                                                                             | 720                                                                                                                                              | 2848                                                                                                                                                         |
| Radiation type                                                | Cu K $\alpha$                                                                                                             | Mo K $\alpha$                                                                                                                                   | Mo K $\alpha$                                                                                                                                                 | Mo K $\alpha$                                                                                                                                   | Mo K $\alpha$                                                                                                                                    | Mo K $\alpha$                                                                                                                                                |
| Absorption coefficient / mm <sup>-1</sup>                     | 2.999                                                                                                                     | 0.337                                                                                                                                           | 0.331                                                                                                                                                         | 0.335                                                                                                                                           | 0.357                                                                                                                                            | 0.357                                                                                                                                                        |
| Crystal size / mm <sup>3</sup>                                | 0.30 x 0.20 x 0.10                                                                                                        | 0.20 x 0.20 x 0.20                                                                                                                              | 0.20 x 0.20 x 0.20                                                                                                                                            | 0.20 x 0.20 x 0.20                                                                                                                              | 0.20 x 0.20 x 0.20                                                                                                                               | 0.20 x 0.20 x 0.20                                                                                                                                           |
| 2 $\theta$ range / °                                          | 7.29-101.28                                                                                                               | 7.32-60.93                                                                                                                                      | 7.56-49.96                                                                                                                                                    | 7.49-50.26                                                                                                                                      | 7.22-52.50                                                                                                                                       | 7.23-59.48                                                                                                                                                   |
| Completeness to max 2 $\theta$                                | 0.739                                                                                                                     | 0.945                                                                                                                                           | 0.992                                                                                                                                                         | 0.879                                                                                                                                           | 0.986                                                                                                                                            | 0.829                                                                                                                                                        |
| No. of reflections measured                                   | 2791                                                                                                                      | 4499                                                                                                                                            | 11570                                                                                                                                                         | 6723                                                                                                                                            | 6371                                                                                                                                             | 13502                                                                                                                                                        |
| No. of independent reflections                                | 2642                                                                                                                      | 4499                                                                                                                                            | 2977                                                                                                                                                          | 2457                                                                                                                                            | 3109                                                                                                                                             | 3364                                                                                                                                                         |
| <i>R</i> (int)                                                | 0.0306                                                                                                                    | 0.0325                                                                                                                                          | 0.0465                                                                                                                                                        | 0.1056                                                                                                                                          | 0.0302                                                                                                                                           | 0.0491                                                                                                                                                       |
| No. parameters / restraints                                   | 415 / 0                                                                                                                   | 227 / 14                                                                                                                                        | 226 / 1                                                                                                                                                       | 199 / 0                                                                                                                                         | 217 / 6                                                                                                                                          | 217 / 6                                                                                                                                                      |
| Final <i>R</i> 1 values [ <i>I</i> > 2 $\sigma$ ( <i>I</i> )] | 0.0455                                                                                                                    | 0.0475                                                                                                                                          | 0.0338                                                                                                                                                        | 0.0368                                                                                                                                          | 0.0343                                                                                                                                           | 0.0388                                                                                                                                                       |
| Final <i>wR</i> ( <i>F</i> <sup>2</sup> ) values (all data)   | 0.1290                                                                                                                    | 0.1026                                                                                                                                          | 0.0828                                                                                                                                                        | 0.0694                                                                                                                                          | 0.0744                                                                                                                                           | 0.0898                                                                                                                                                       |
| Goodness-of-fit on <i>F</i> <sup>2</sup>                      | 1.025                                                                                                                     | 1.083                                                                                                                                           | 1.066                                                                                                                                                         | 0.803                                                                                                                                           | 1.065                                                                                                                                            | 1.040                                                                                                                                                        |
| Largest difference peak & hole / e Å <sup>-3</sup>            | 0.235, -0.229                                                                                                             | 0.267, -0.332                                                                                                                                   | 0.209, -0.343                                                                                                                                                 | 0.307, -0.190                                                                                                                                   | 0.201, -0.237                                                                                                                                    | 0.288, -0.482                                                                                                                                                |
| Flack parameter                                               |                                                                                                                           | 0.47(11) [inv. twin]                                                                                                                            | -0.05(3)                                                                                                                                                      | 0.03(6)                                                                                                                                         | -0.01(4)                                                                                                                                         | -0.06(4)                                                                                                                                                     |



## The extensive solid-form landscape of sulfathiazole: geometrical similarity and interaction energies

David S. Hughes, Ann L. Bingham, Michael B. Hursthouse, Terry L. Threlfall and Andrew D. Bond

### S2. Crystallographic information for the new crystal structures

|                                                               | 65                                                                                                                                                            | 66                                                                                                                                              | 67                                                                                                                                             | 68                                                                                                                                                           | 69                                                                                                                                                            | 89                                                                                                                                                                                                                                             |
|---------------------------------------------------------------|---------------------------------------------------------------------------------------------------------------------------------------------------------------|-------------------------------------------------------------------------------------------------------------------------------------------------|------------------------------------------------------------------------------------------------------------------------------------------------|--------------------------------------------------------------------------------------------------------------------------------------------------------------|---------------------------------------------------------------------------------------------------------------------------------------------------------------|------------------------------------------------------------------------------------------------------------------------------------------------------------------------------------------------------------------------------------------------|
| CCDC number                                                   | 2120810                                                                                                                                                       | 2120816                                                                                                                                         | 2120811                                                                                                                                        | 2120817                                                                                                                                                      | 2120813                                                                                                                                                       | 2120815                                                                                                                                                                                                                                        |
| Moiety formula                                                | [C <sub>9</sub> H <sub>8</sub> N <sub>3</sub> O <sub>2</sub> S <sub>2</sub> ] <sup>-</sup> ,<br>[C <sub>5</sub> H <sub>14</sub> N <sub>3</sub> ] <sup>+</sup> | [C <sub>9</sub> H <sub>8</sub> N <sub>3</sub> O <sub>2</sub> S <sub>2</sub> ] <sup>-</sup> ,<br>[C <sub>6</sub> H <sub>14</sub> N] <sup>+</sup> | [C <sub>9</sub> H <sub>8</sub> N <sub>3</sub> O <sub>2</sub> S <sub>2</sub> ] <sup>-</sup> ,<br>[C <sub>2</sub> H <sub>8</sub> N] <sup>+</sup> | [C <sub>9</sub> H <sub>8</sub> N <sub>3</sub> O <sub>2</sub> S <sub>2</sub> ] <sup>-</sup> ,<br>[C <sub>2</sub> H <sub>9</sub> N <sub>2</sub> ] <sup>+</sup> | [C <sub>9</sub> H <sub>8</sub> N <sub>3</sub> O <sub>2</sub> S <sub>2</sub> ] <sup>-</sup> ,<br>[C <sub>5</sub> H <sub>13</sub> N <sub>2</sub> ] <sup>+</sup> | C <sub>9</sub> H <sub>9</sub> N <sub>3</sub> O <sub>2</sub> S <sub>2</sub> ,<br>[C <sub>9</sub> H <sub>8</sub> N <sub>3</sub> O <sub>2</sub> S <sub>2</sub> ] <sup>-</sup> ,<br>[C <sub>15</sub> H <sub>27</sub> N <sub>2</sub> ] <sup>+</sup> |
| Total formula                                                 | C <sub>14</sub> H <sub>22</sub> N <sub>6</sub> O <sub>2</sub> S <sub>2</sub>                                                                                  | C <sub>15</sub> H <sub>22</sub> N <sub>4</sub> O <sub>2</sub> S <sub>2</sub>                                                                    | C <sub>11</sub> H <sub>16</sub> N <sub>4</sub> O <sub>2</sub> S <sub>2</sub>                                                                   | C <sub>11</sub> H <sub>17</sub> N <sub>5</sub> O <sub>2</sub> S <sub>2</sub>                                                                                 | C <sub>14</sub> H <sub>21</sub> N <sub>5</sub> O <sub>2</sub> S <sub>2</sub>                                                                                  | C <sub>33</sub> H <sub>44</sub> N <sub>8</sub> O <sub>4</sub> S <sub>4</sub>                                                                                                                                                                   |
| Formula weight                                                | 370.49                                                                                                                                                        | 354.48                                                                                                                                          | 300.40                                                                                                                                         | 315.41                                                                                                                                                       | 355.48                                                                                                                                                        | 745.00                                                                                                                                                                                                                                         |
| Temperature / K                                               | 150(2)                                                                                                                                                        | 150(2)                                                                                                                                          | 150(2)                                                                                                                                         | 150(2)                                                                                                                                                       | 150(2)                                                                                                                                                        | 150(2)                                                                                                                                                                                                                                         |
| Crystal system                                                | monoclinic                                                                                                                                                    | monoclinic                                                                                                                                      | monoclinic                                                                                                                                     | monoclinic                                                                                                                                                   | orthorhombic                                                                                                                                                  | monoclinic                                                                                                                                                                                                                                     |
| Space group                                                   | P 21                                                                                                                                                          | P 21/c                                                                                                                                          | P 21/c                                                                                                                                         | C 2/c                                                                                                                                                        | P 21 21 21                                                                                                                                                    | P 21                                                                                                                                                                                                                                           |
| <i>a</i> / Å                                                  | 10.449(2)                                                                                                                                                     | 8.081(2)                                                                                                                                        | 20.623(4)                                                                                                                                      | 10.838(2)                                                                                                                                                    | 8.401(2)                                                                                                                                                      | 16.676(3)                                                                                                                                                                                                                                      |
| <i>b</i> / Å                                                  | 13.331(3)                                                                                                                                                     | 16.676(2)                                                                                                                                       | 8.3200(17)                                                                                                                                     | 11.826(2)                                                                                                                                                    | 11.142(2)                                                                                                                                                     | 11.771(2)                                                                                                                                                                                                                                      |
| <i>c</i> / Å                                                  | 13.664(3)                                                                                                                                                     | 13.1690(7)                                                                                                                                      | 18.157(4)                                                                                                                                      | 22.321(4)                                                                                                                                                    | 17.746(4)                                                                                                                                                     | 19.062(4)                                                                                                                                                                                                                                      |
| $\alpha$ / °                                                  | 90                                                                                                                                                            | 90                                                                                                                                              | 90                                                                                                                                             | 90                                                                                                                                                           | 90                                                                                                                                                            | 90                                                                                                                                                                                                                                             |
| $\beta$ / °                                                   | 110.38(3)                                                                                                                                                     | 104.56(2)                                                                                                                                       | 115.64(3)                                                                                                                                      | 90.14(3)                                                                                                                                                     | 90                                                                                                                                                            | 111.71(3)                                                                                                                                                                                                                                      |
| $\gamma$ / °                                                  | 90                                                                                                                                                            | 90                                                                                                                                              | 90                                                                                                                                             | 90                                                                                                                                                           | 90                                                                                                                                                            | 90                                                                                                                                                                                                                                             |
| Unit-cell volume / Å <sup>3</sup>                             | 1784.2(7)                                                                                                                                                     | 1717.6(5)                                                                                                                                       | 2808.7(12)                                                                                                                                     | 2860.9(9)                                                                                                                                                    | 1661.1(6)                                                                                                                                                     | 3476.3(13)                                                                                                                                                                                                                                     |
| <i>Z</i>                                                      | 4                                                                                                                                                             | 4                                                                                                                                               | 8                                                                                                                                              | 8                                                                                                                                                            | 4                                                                                                                                                             | 4                                                                                                                                                                                                                                              |
| Calc. density / g cm <sup>-3</sup>                            | 1.379                                                                                                                                                         | 1.371                                                                                                                                           | 1.421                                                                                                                                          | 1.465                                                                                                                                                        | 1.421                                                                                                                                                         | 1.423                                                                                                                                                                                                                                          |
| <i>F</i> (000)                                                | 784                                                                                                                                                           | 752                                                                                                                                             | 1264                                                                                                                                           | 1328                                                                                                                                                         | 752                                                                                                                                                           | 1576                                                                                                                                                                                                                                           |
| Radiation type                                                | Mo K $\alpha$                                                                                                                                                 | Mo K $\alpha$                                                                                                                                   | Mo K $\alpha$                                                                                                                                  | Mo K $\alpha$                                                                                                                                                | Mo K $\alpha$                                                                                                                                                 | Mo K $\alpha$                                                                                                                                                                                                                                  |
| Absorption coefficient / mm <sup>-1</sup>                     | 0.319                                                                                                                                                         | 0.325                                                                                                                                           | 0.383                                                                                                                                          | 0.381                                                                                                                                                        | 0.337                                                                                                                                                         | 0.325                                                                                                                                                                                                                                          |
| Crystal size / mm <sup>3</sup>                                | 0.20 x 0.20 x 0.20                                                                                                                                            | 0.20 x 0.20 x 0.20                                                                                                                              | 0.20 x 0.20 x 0.20                                                                                                                             | 0.20 x 0.20 x 0.20                                                                                                                                           | 0.20 x 0.20 x 0.20                                                                                                                                            | 0.20 x 0.20 x 0.20                                                                                                                                                                                                                             |
| 2 $\theta$ range / °                                          | 7.06-52.72                                                                                                                                                    | 7.14-49.86                                                                                                                                      | 2.19-50.16                                                                                                                                     | 7.13-55.07                                                                                                                                                   | 7.31-42.06                                                                                                                                                    | 7.29-50.09                                                                                                                                                                                                                                     |
| Completeness to max 2 $\theta$                                | 0.894                                                                                                                                                         | 0.817                                                                                                                                           | 0.983                                                                                                                                          | 0.985                                                                                                                                                        | 0.987                                                                                                                                                         | 0.993                                                                                                                                                                                                                                          |
| No. of reflections measured                                   | 15098                                                                                                                                                         | 6680                                                                                                                                            | 15775                                                                                                                                          | 12059                                                                                                                                                        | 6966                                                                                                                                                          | 27570                                                                                                                                                                                                                                          |
| No. of independent reflections                                | 6430                                                                                                                                                          | 2450                                                                                                                                            | 4914                                                                                                                                           | 3207                                                                                                                                                         | 1772                                                                                                                                                          | 11517                                                                                                                                                                                                                                          |
| <i>R</i> (int)                                                | 0.0896                                                                                                                                                        | 0.0939                                                                                                                                          | 0.1094                                                                                                                                         | 0.0467                                                                                                                                                       | 0.0822                                                                                                                                                        | 0.0409                                                                                                                                                                                                                                         |
| No. parameters / restraints                                   | 441 / 1                                                                                                                                                       | 218 / 3                                                                                                                                         | 348 / 0                                                                                                                                        | 211 / 12                                                                                                                                                     | 226 / 6                                                                                                                                                       | 883 / 1                                                                                                                                                                                                                                        |
| Final <i>R</i> 1 values [ <i>I</i> > 2 $\sigma$ ( <i>I</i> )] | 0.0652                                                                                                                                                        | 0.0399                                                                                                                                          | 0.0869                                                                                                                                         | 0.0371                                                                                                                                                       | 0.0317                                                                                                                                                        | 0.0413                                                                                                                                                                                                                                         |
| Final <i>wR</i> ( <i>F</i> <sup>2</sup> ) values (all data)   | 0.1059                                                                                                                                                        | 0.0945                                                                                                                                          | 0.2265                                                                                                                                         | 0.0877                                                                                                                                                       | 0.0671                                                                                                                                                        | 0.1026                                                                                                                                                                                                                                         |
| Goodness-of-fit on <i>F</i> <sup>2</sup>                      | 1.066                                                                                                                                                         | 0.941                                                                                                                                           | 1.046                                                                                                                                          | 1.064                                                                                                                                                        | 1.037                                                                                                                                                         | 1.028                                                                                                                                                                                                                                          |
| Largest difference peak & hole / e Å <sup>-3</sup>            | 0.305, -0.398                                                                                                                                                 | 0.248, -0.288                                                                                                                                   | 0.841, -0.432                                                                                                                                  | 0.238, -0.431                                                                                                                                                | 0.175, -0.178                                                                                                                                                 | 0.320, -0.347                                                                                                                                                                                                                                  |
| Flack parameter                                               | -0.06(6)                                                                                                                                                      |                                                                                                                                                 |                                                                                                                                                |                                                                                                                                                              | -0.06(7)                                                                                                                                                      | 0.00(4)                                                                                                                                                                                                                                        |

### **S3. Details of DFT-D minimisation**

Prior to energy minimisation, the positions of all H atoms in the X-ray structures were normalised using the default settings in *Mercury* to produce starting positions close to nuclear positions. DFT-D calculations were then made using *CASTEP* via the interface in *Materials Studio*. The PBE exchange-correlation functional was applied, with a dispersion correction according to Grimme. The plane-wave basis-set cut-off was set to 340 eV and all other parameters were set to the “Fine” defaults in *Materials Studio*. Unit-cell parameters were constrained in each case to those from the reported crystal structure and the space-group symmetry was imposed. In the structures showing solvent disorder, models were constructed for each disorder component and minimised separately. One structure was then chosen for subsequent analysis, as described below. Structures in centred space groups were converted to a primitive setting for efficient minimisation, then subsequently restored to the centred space group. Minimised structures were compared to the starting structures using the method described by van de Streek and Neumann, confirming that the changes in atomic positions do not significantly distort the crystal structure (results are included in the optimised CIFs).

**6:** the solvent molecules lie on inversion centres in space group  $P2_1/c$ , so the symmetry was reduced to  $Pc$  to produce complete molecules. The minimised structure in  $Pc$  was confirmed to conform to  $P2_1/c$  (*i.e.* the diethyloxalate molecule and its environment retains inversion symmetry) and subsequently restored to that group.

**8:** although the location of the solvent molecule was clear from the X-ray data, the electron density comprised an overlay of several orientations that could not easily be resolved. The most prominent set of peaks in the electron density was modelled with restraints to provide a starting set for energy minimisation. Small changes in atomic positions on minimisation suggest that the result is a satisfactory representation of the X-ray structure.

**11, 14:** one disorder component of the solvent molecule was clearly dominant (75-80%) in the X-ray structure, and in both cases the structure containing only this component led to satisfactory minimisation. The minor disorder component led to significantly larger atomic displacements on minimisation, consistent with a less well-defined starting model. The structure containing the major component was retained in the standardised set.

**15, 18, 22, 26, 60:** two disorder components of the solvent molecule have close to equal occupancy in the X-ray refinements and both disorder components led to satisfactory minimisation. The orientation of the solvent has no impact on the resulting analysis, so one structure was chosen arbitrarily in each case to be retained in the standardised set.

### S3. Details of DFT-D minimisation

**28, 29, 30:** the solvent molecules lie on inversion centres in space group  $P2_1/n$ , so the symmetry was reduced to  $P2_1$  to produce complete molecules. The minimised structure in  $P2_1$  was confirmed to conform to  $P2_1/n$  and subsequently restored to that group.

**32:** the solvent molecule shows a consistent position for the nitrile group, but apparent disorder of the alkyl chain. The major occupancy component (ca 63%) was chosen arbitrarily as the starting position for the alkyl chain and minimisation proceeded satisfactorily.

**35:** the X-ray structure in space group  $P2_1/n$  includes disorder of the non-centrosymmetric azelanitrile molecules around crystallographic inversion centres. The symmetry was reduced to space group  $P2_1$  to accommodate the azelanitrile molecules without disorder and the  $P2_1$  model is retained in the standardised set. The SLFZ molecules alone define space group  $P2_1/n$  (comparable to the structures of **1n–7n**) and the minimised structure was restored to  $P2_1/n$  in the structure set containing SLFZ molecules only.

**50:** the structure in the CSD (LOFLUP) shows disorder of the pentanedioic acid molecule. The two disorder components show different hydrogen-bond patterns at one end of the carboxylic acid molecule, forming either an O—H...O interaction to one SLFZ molecule or an O—H...N interaction to a neighbouring SLFZ. The two components were extracted and minimised separately, and the structure containing the O—H...O interaction was found to be lower in energy. Hence, this structure was retained in the DFT-optimised set.

**52:** the structure in the CSD (SOGSEO) has one H atom missing from SLFZ. The structure contains the prominent centrosymmetric  $R_2^2(8)$  H-bonded dimer, so it is evident that the missing H atom should be attached to N13. The corrected structure is included in the DFT-optimised set.

**53:** the structure in the CSD (STHSAM01) contains one rogue H atom position, which should be part of the SLFZ  $\text{NH}_2$  group. The H atom was placed on N11 prior to minimisation and the corrected structure is included in the DFT-optimised set.

**71:** the structure in the CSD (BUWDUT) shows disorder of  $[\text{SiF}_6]^{2-}$  around a crystallographic 2-fold axis. The structure was reduced to space group  $Cc$  and only the major component of  $[\text{SiF}_6]^{2-}$  was kept. After minimisation, the structure could be restored to space group  $C2/c$ , without imposing disorder on  $[\text{SiF}_6]^{2-}$  (i.e. the optimised position of  $[\text{SiF}_6]^{2-}$  conforms to the 2-fold symmetry).

**83:** the structure (VEYQUO) includes disorder of the (H) $\text{NO}_3$  molecules, in a ratio of approximately 82:18%. The atoms of the minority component were deleted, and minimisation proceeded satisfactorily to give the structure included in the DFT-optimised set.

### **S3. Details of DFT-D minimisation**

**85:** the published structure (VEYREZ) in space group  $C2/c$  imposes disorder on the  $SO_4^{2-}/H_2O$  molecules, and the thiazole ring of sulfathiazole is split into two closely-spaced positions. The structure was converted to space group  $Cc$ , with two independent sulfathiazole molecules, to permit an ordered arrangement to be defined for  $SO_4^{2-}$  and  $H_2O$ . The two independent thiazole rings in the minimised structure in  $Cc$  reproduce the split-site model when averaged back to space group  $C2/c$ . The minimised model in  $Cc$  is retained in the full standardised set to eliminate the  $SO_4^{2-}/H_2O$  disorder. However, given the closeness of the SLFZ molecules to  $C2/c$ , the higher-symmetry model was used for the purposes of comparing SLFZ molecules only.

**86:** the published structure in  $Pbcn$  (VEYYEG) includes overlaid positions for the benzenesulfonate anions, which can be separated into two different ordered structures in space groups  $Pca2_1$  and  $Pna2_1$ . The structures contain identical positions for SLFZ, so the choice does not affect the subsequent analysis. The  $Pna2_1$  structure is included in the full DFT-optimised set. For the structure set containing SLFZ molecules only, the minimised structure was restored to the centrosymmetric group  $Pnab$  (retaining correspondence of the unit cell with the  $Pna2_1$  version).

**87:** the structure in the CSD (FIFWOJ) is reported in space group  $P-1$  with  $Z' = 2$ . The correct space group is actually  $P2_1/n$  with  $Z' = 1$ . The  $P2_1/n$  version was constructed for minimisation, and is included in the DFT-optimised set.

#### **References**

- **Materials Studio:** Accelrys, *Materials Studio v. 6.0*, San Diego, California, USA, 2011.
- **CASTEP:** S. J. Clark, M. D. Segall, C. J. Pickard, P. J. Hasnip, M. J. Probert, K. Refson and M. C. Payne, *Z. Kristallogr.*, 2005, **220**, 567.
- **PBE functional:** J. P. Perdew, K. Burke and M. Ernzerhof, *Phys. Rev. Lett.*, 1996, **77**, 3865.
- **Dispersion correction:** S. Grimme, *J. Comput. Chem.*, 2006, **27**, 1787.
- **Structure Comparison:** J. Van de Streek and M. A. Neumann, *Acta Cryst. Sect. B.*, 2010, **66**, 544.

## S4. Molecular conformation and torsion angles

Based on the analysis by Kálmán *et al.* (*Acta Cryst.* 1981, **B37**, 868-977), the molecular conformation of SLFZ is described principally by two torsion angles:

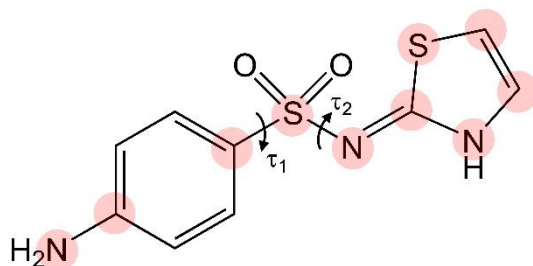

$$\tau_1 = \text{N12—S11—C14—(C13 or C15)}$$

$$\tau_2 = \text{C14—S11—N12—C17}$$

The *R* conformation shows a negative value for  $\tau_2$  in the range 0 to  $-180^\circ$ .

The *S* conformation shows a positive value for  $\tau_2$  in the range 0 to  $+180^\circ$ .

In both cases, C13 or C15 is selected to give the largest absolute value of  $\tau_1$ .

To compare molecules, both  $\tau_1$  and  $\tau_2$  are considered as absolute values.

### Histograms of $|\tau_1|$ and $|\tau_2|$ values for all 96 structures:

Values are grouped at  $10^\circ$  intervals with a range  $\pm 5^\circ$  (e.g. the bin centred at  $110^\circ$  contains values in the range  $105\text{--}115^\circ$ ).

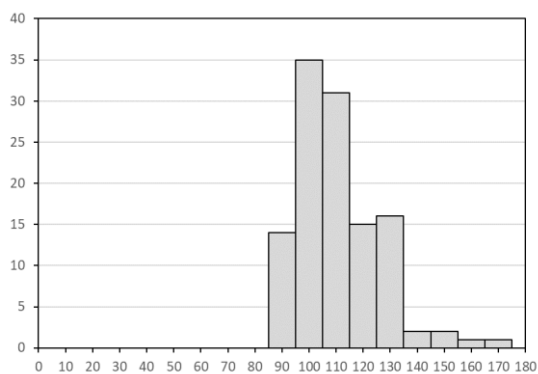

$|\tau_1|$

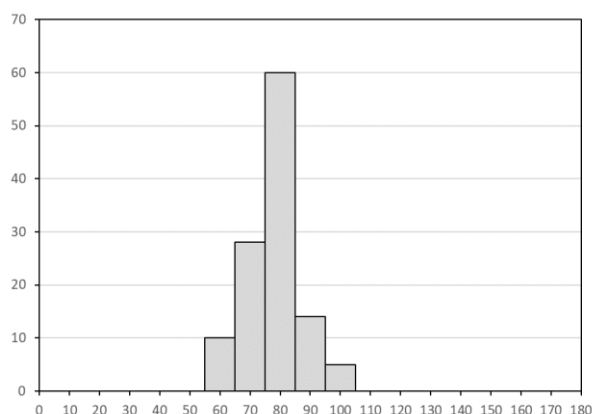

$|\tau_2|$

The tail to the right of the distribution for  $|\tau_1|$  is populated principally by salts.

## S4. Molecular conformation and torsion angles

### Scattergram of $|\tau_2|$ vs $|\tau_1|$ values for all 96 structures:

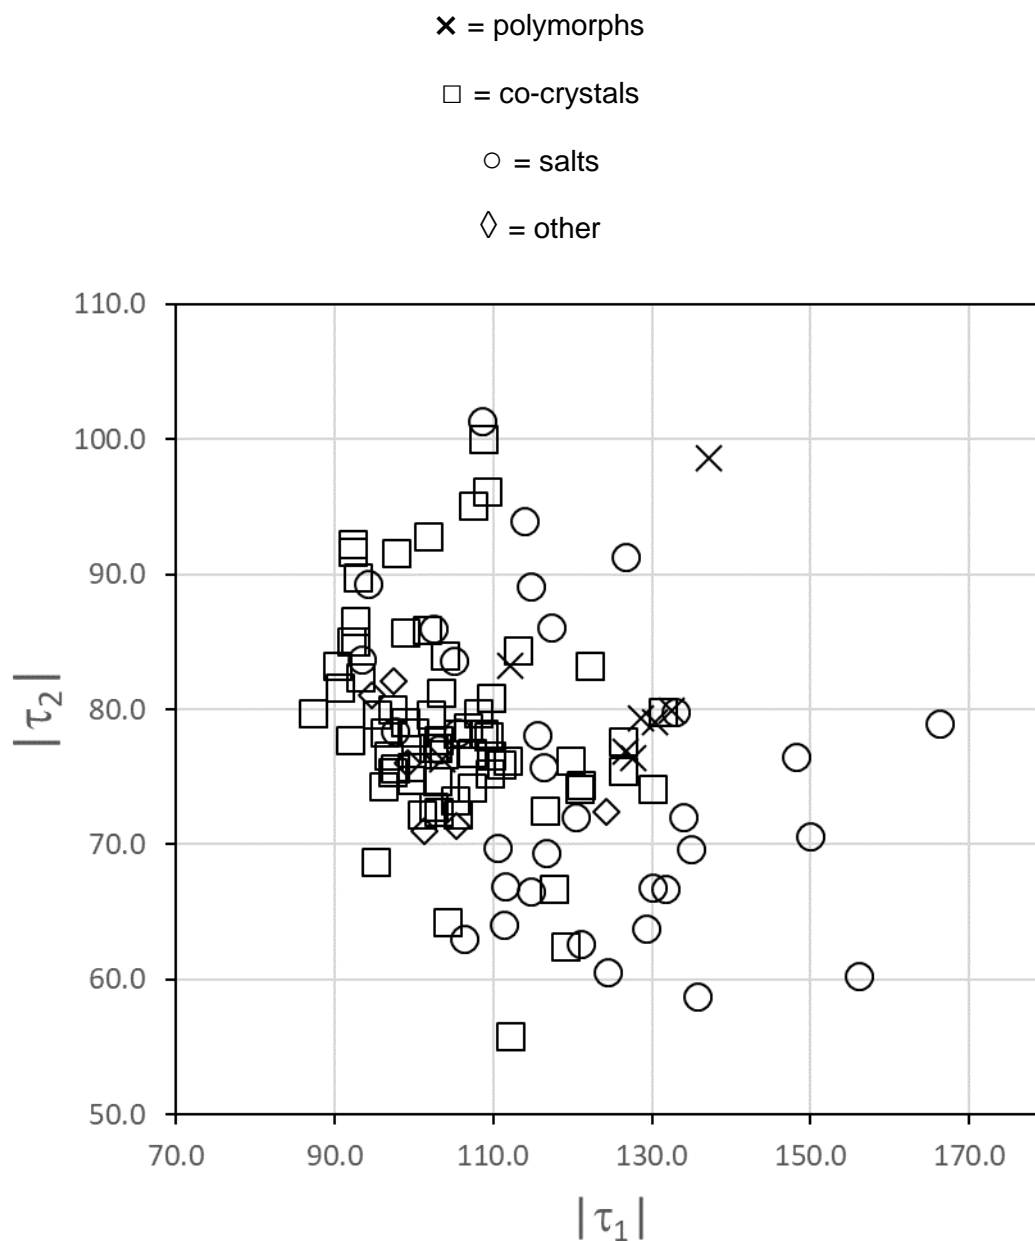

The outlier amongst the polymorphs ( $\tau_1 = 137.2$ ,  $\tau_2 = 98.6^\circ$ ) is molecule 1 in **2p**.

# The extensive solid-form landscape of sulfathiazole: geometrical similarity and interaction energies

David S. Hughes, Ann L. Bingham, Michael B. Hursthouse, Terry L. Threlfall and Andrew D. Bond

## S4. Molecular conformation and torsion angles

|    |    |   | $\tau_1$ | $\tau_2$ |  |    |    |   | $\tau_1$ | $\tau_2$ |
|----|----|---|----------|----------|--|----|----|---|----------|----------|
| 1p | 01 | R | 112.2    | -83.2    |  | 43 | 01 | R | 117.6    | -66.7    |
|    | 02 | R | 103.6    | -76.3    |  | 44 | 01 | R | 92.6     | -85.0    |
| 2p | 01 | R | 137.2    | -98.6    |  | 45 | 01 | R | 92.0     | -77.7    |
|    | 02 | S | -132.5   | 79.9     |  |    | 02 | R | 104.0    | -84.0    |
| 3p | 01 | R | 127.7    | -76.4    |  | 46 | 01 | R | 120.8    | -74.1    |
|    | 02 | R | 128.6    | -79.3    |  | 47 | 01 | R | 100.0    | -78.3    |
| 4p | 01 | R | 126.7    | -76.9    |  | 48 | 01 | R | 122.1    | -83.2    |
| 5p | 01 | R | 130.4    | -79.1    |  | 49 | 01 | R | 103.4    | -81.2    |
| 1  | 01 | R | 95.2     | -68.7    |  | 50 | 01 | R | 92.3     | -91.7    |
|    | 02 | R | 121.0    | -74.4    |  | 51 | 01 | R | -107.5   | -95.1    |
| 2  | 01 | R | 111.9    | -76.2    |  | 52 | 01 | R | -101.9   | -92.8    |
| 3  | 01 | R | -108.7   | -100.0   |  | 53 | 01 | R | 131.3    | -79.8    |
|    | 02 | R | 109.7    | -80.9    |  | 54 | 01 | R | 90.3     | -83.2    |
| 4  | 01 | R | 96.9     | -76.6    |  | 55 | 01 | R | 107.4    | -76.8    |
|    | 02 | R | 119.1    | -62.5    |  | 56 | 01 | R | 109.4    | -78.0    |
| 5  | 01 | R | -109.2   | -96.1    |  | 57 | 01 | R | 108.8    | -78.2    |
| 6  | 01 | R | 119.8    | -76.2    |  | 58 | 01 | R | 109.8    | -76.6    |
| 7  | 01 | R | 109.5    | -75.3    |  | 59 | 01 | R | 111.1    | -75.9    |
| 8  | 01 | R | 97.3     | -75.4    |  | 60 | 01 | R | 120.4    | -72.0    |
| 9  | 01 | R | 101.0    | -72.2    |  | 61 | 01 | R | 150.0    | -70.6    |
| 10 | 01 | R | 130.1    | -74.1    |  | 62 | 01 | R | 116.7    | -69.4    |
| 11 | 01 | R | 97.7     | -75.6    |  | 63 | 01 | R | 114.7    | -66.5    |
| 12 | 01 | R | 103.0    | -74.7    |  | 64 | 01 | R | 111.5    | -66.9    |
| 13 | 01 | R | 103.1    | -72.4    |  | 65 | 01 | R | 105.1    | -83.6    |
| 14 | 01 | R | 105.3    | -73.3    |  |    | 02 | R | 135.7    | -58.8    |
| 15 | 01 | R | 96.2     | -74.3    |  | 66 | 01 | R | 129.2    | -63.8    |
| 16 | 01 | R | 126.3    | -75.5    |  | 67 | 01 | R | 103.1    | -77.1    |
| 17 | 01 | R | 126.4    | -77.6    |  |    | 02 | S | -97.6    | 78.4     |
| 18 | 01 | R | 103.1    | -77.7    |  | 68 | 01 | R | 130.0    | -66.8    |
| 19 | 01 | R | 116.6    | -72.5    |  | 69 | 01 | R | 106.3    | -63.0    |
| 20 | 01 | R | 104.3    | -64.3    |  | 70 | 01 | R | 116.3    | -75.7    |
|    | 02 | S | -106.8   | 78.7     |  | 71 | 01 | R | -113.9   | -94.0    |
| 21 | 01 | R | 96.4     | -78.3    |  | 72 | 01 | R | 111.4    | -64.1    |
| 22 | 01 | R | 99.7     | -74.8    |  | 73 | 01 | R | 110.5    | -69.8    |
| 23 | 01 | R | 90.7     | -81.6    |  | 74 | 01 | R | 131.7    | -66.7    |
|    | 02 | S | -113.2   | 84.4     |  | 75 | 01 | R | 93.4     | -83.7    |
| 24 | 01 | R | 112.2    | -55.8    |  | 76 | 01 | R | 102.4    | -86.0    |
| 25 | 01 | R | 87.3     | -79.7    |  | 77 | 01 | R | 121.1    | -62.6    |
|    | 02 | S | -102.2   | 79.6     |  | 78 | 01 | R | 105.6    | -78.3    |
| 26 | 01 | R | 92.3     | -92.3    |  | 79 | 01 | R | 124.5    | -60.6    |
| 27 | 01 | R | 97.8     | -91.6    |  | 80 | 01 | R | 134.9    | -69.7    |
| 28 | 01 | R | 103.8    | -76.7    |  |    | 02 | R | -94.2    | -89.3    |
| 29 | 01 | R | 105.5    | -72.2    |  | 81 | 01 | R | 115.6    | -78.1    |
| 30 | 01 | R | 97.3     | -80.0    |  | 82 | 01 | R | 156.1    | -60.3    |
| 31 | 01 | R | 105.6    | -78.2    |  | 83 | 01 | R | 148.2    | -76.5    |
| 32 | 01 | R | 102.9    | -77.2    |  |    | 02 | R | 133.0    | -79.8    |
| 33 | 01 | R | 92.1     | -85.0    |  | 84 | 01 | R | 166.3    | -79.0    |
| 34 | 01 | R | -92.7    | -86.6    |  | 85 | 01 | R | -126.7   | -91.3    |
| 35 | 01 | R | 102.4    | -72.8    |  | 86 | 01 | R | 114.8    | -89.1    |
| 36 | 01 | R | 101.6    | -85.9    |  |    | 02 | R | 117.4    | -86.1    |
| 37 | 01 | R | 108.1    | -79.7    |  | 87 | 01 | R | -108.6   | -101.4   |
| 38 | 01 | R | -92.9    | -89.8    |  | 88 | 01 | R | 133.9    | -72.0    |
| 39 | 01 | R | 95.3     | -79.6    |  | 89 | 01 | R | 105.4    | -71.4    |
|    | 02 | R | 102.4    | -77.2    |  |    | 02 | S | -94.7    | 81.1     |
| 40 | 01 | R | 93.3     | -82.4    |  |    | 03 | R | 97.5     | -82.1    |
|    | 02 | R | 99.0     | -79.1    |  |    | 04 | S | -99.3    | 76.0     |
| 41 | 01 | R | 99.8     | -75.7    |  | 90 | 01 | R | 124.3    | -72.4    |
|    | 02 | R | 98.9     | -85.7    |  | 91 | 01 | R | 101.4    | -71.0    |
| 42 | 01 | R | 107.4    | -74.2    |  |    |    |   |          |          |

## The extensive solid-form landscape of sulfathiazole: geometrical similarity and interaction energies

David S. Hughes, Ann L. Bingham, Michael B. Hursthouse, Terry L. Threlfall and Andrew D. Bond

### S5. CrystalCMP

CrystalCMP rev. 111 (1<sup>st</sup> April 2020). 96 vs 96 Packing Similarity with the following settings:

Packing (Not Responding)

| ID            | of molecule | class of molecule | best molecule | show molecule | compare |
|---------------|-------------|-------------------|---------------|---------------|---------|
| 0: 1m_SLFZ.c  | 1           | C9N3O2S2          | C9N3O2S2      | show          | YES     |
| 1: 1n_SLFZ.c  | 1           | C9N3O2S2          | C9N3O2S2      | show          | YES     |
| 2: 1o_SLFZ.c  | 2           | C9N3O2S2          | C9N3O2S2      | show          | YES     |
| 3: 1p_DFT.ci  | 2           | C9N3O2S2          | C9N3O2S2      | show          | YES     |
| 4: 2m_SLFZ.c  | 1           | C9N3O2S2          | C9N3O2S2      | show          | YES     |
| 5: 2n_SLFZ.c  | 1           | C9N3O2S2          | C9N3O2S2      | show          | YES     |
| 6: 2p_DFT.ci  | 2           | C9N3O2S2          | C9N3O2S2      | show          | YES     |
| 7: 3m_SLFZ.c  | 1           | C9N3O2S2          | C9N3O2S2      | show          | YES     |
| 8: 3n_SLFZ.c  | 1           | C9N3O2S2          | C9N3O2S2      | show          | YES     |
| 9: 3o_SLFZ.c  | 1           | C9N3O2S2          | C9N3O2S2      | show          | YES     |
| 10: 3p_DFT.ci | 2           | C9N3O2S2          | C9N3O2S2      | show          | YES     |
| 11: 4m_SLFZ.c | 2           | C9N3O2S2          | C9N3O2S2      | show          | YES     |
| 12: 4n_SLFZ.c | 1           | C9N3O2S2          | C9N3O2S2      | show          | YES     |
| 13: 4o_SLFZ.c | 2           | C9N3O2S2          | C9N3O2S2      | show          | YES     |
| 14: 4p_DFT.ci | 1           | C9N3O2S2          | C9N3O2S2      | show          | YES     |

| Count | Hash            |
|-------|-----------------|
| 1     | C_CCN_CCCCC_    |
| 1     | C_CCS_CCCCCNOO_ |
| 2     | C_CC_CCCCN_     |
| 2     | C_CC_CCCCS_     |
| 1     | C_CN_CCCS_      |
| 1     | C_CS_CCCN_      |
| 1     | C_NNS_CCCCS_    |
| 1     | N_CC_CNNS_      |
| 1     | N_CS_CNNS_      |
| 1     | N_C_CCN_        |
| 2     | O_S_CNNOO_      |
| 1     | S_CC_CNNS_      |
| 1     | S_CNNO_CCCSSS_  |

Calc Combine RMSD (recommended) Calc distance RMSD Calc Angle RMSD Cancel

Default modes

- List contains only identical and non-symmetrical molecules - (NOT RECOMMENDED - It may produce wrong results when symmetrical molecules are present!).
- List contains identical molecules and may contain symmetrical (or close to be symmetrical) molecules.
- List contains different molecules and may contain symmetrical (or close to be symmetrical) molecules - (general method - it can be used in all cases).

nb of neighbours (set nb of neighbouring molecules)

max distance penalty of atoms with equal hash string in Angstroms: (it influences calculation of RMSD)

max distance penalty in Angstroms: (it influences calculation of RMSD when different molecules with identical number of atoms are compared)

max distance penalty of additional atoms: (it influences calculation of RMSD when different molecules with different number of atoms are compared.)

Close limit in Angstroms (angle is calculated only if molecules are closer than this value). This value is ignored when smooth function is used.

Default angle value (default angle is set if any molecule is not closer than 'Close limit'). This value is ignored when smooth function is used.

Setting of influence of dist and angle rmsd in combine method (rmsd = dist\_rmsd + X\*angle\_rmsd), X=

Keep the best fit of the origin molecule (not recommended)  Test inversion (recommended)

Save mol files of overlapped results  Use smooth function for calculating angle rmsd (slower but more precise)

Use sum(diff^3)/N instead of sum(diff^2)/N in calculation of RMSD.



# The extensive solid-form landscape of sulfathiazole: geometrical similarity and interaction energies

David S. Hughes, Ann L. Bingham, Michael B. Hursthouse, Terry L. Threlfall and Andrew D. Bond

## S5. CrystalCMP

CrystalCMP dendrogram calculated using WPGMA method (weighted pair group method with arithmetic mean):

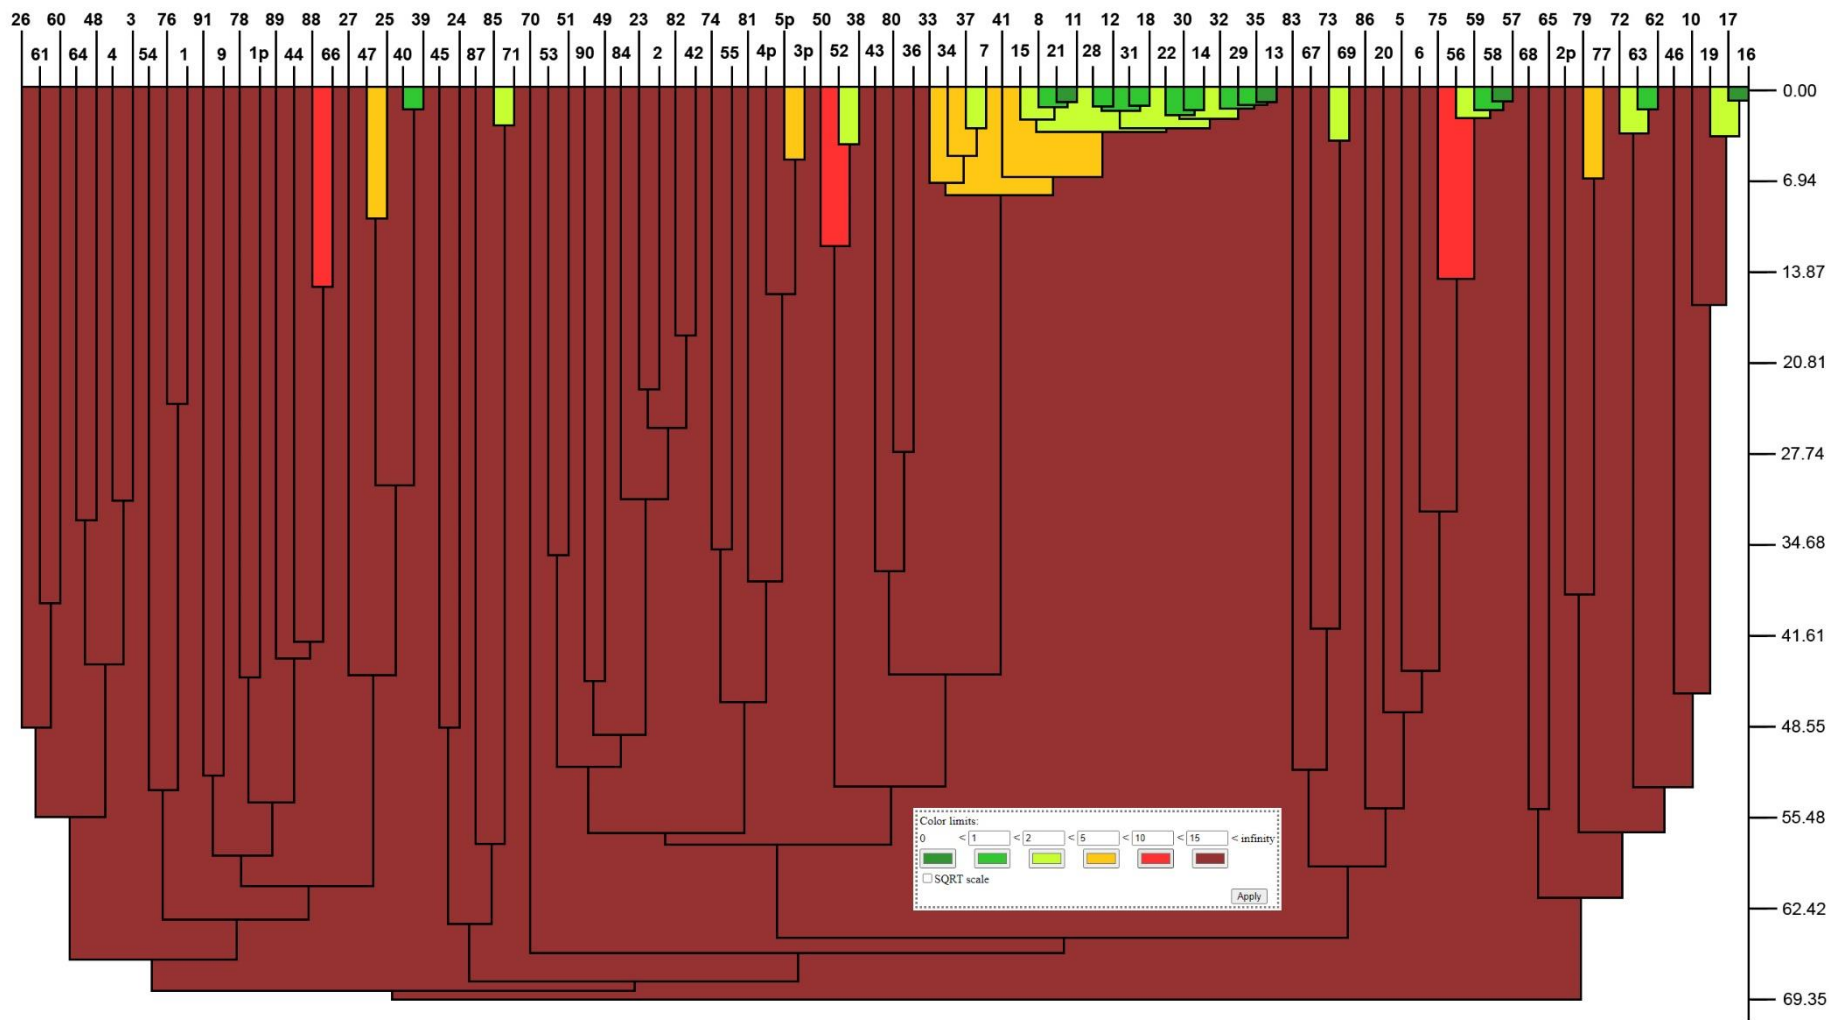

**The extensive solid-form landscape of sulfathiazole: geometrical similarity and interaction energies**

David S. Hughes, Ann L. Bingham, Michael B. Hursthouse, Terry L. Threlfall and Andrew D. Bond

**S5. CrystalCMP**

**CrystalCMP similarity matrices for clusters linked at  $PS_{AB} < 15$ :**

Groups 1 and 2

|    | 8 | 11     | 12     | 13     | 14     | 15     | 18     | 21     | 22     | 28     | 29     | 30     | 31     | 32     | 33      | 34     | 35     | 41     |  | 7       | 37      |        |
|----|---|--------|--------|--------|--------|--------|--------|--------|--------|--------|--------|--------|--------|--------|---------|--------|--------|--------|--|---------|---------|--------|
| 8  |   | 1.1557 | 3.5342 | 2.5501 | 2.5711 | 1.7395 | 2.0638 | 1.3893 | 1.8075 | 4.1215 | 3.662  | 3.1305 | 3.1052 | 3.7156 | 6.3709  | 3.6061 | 2.8737 | 6.0247 |  | 7.1301  | 7.8110  |        |
| 11 |   |        | 2.7861 | 2.2016 | 2.6276 | 2.5689 | 1.2545 | 0.8835 | 2.0243 | 2.5838 | 2.5417 | 2.7387 | 1.7811 | 2.8482 | 5.8113  | 3.5656 | 1.9132 | 6.0991 |  | 6.2087  | 6.7172  |        |
| 12 |   |        |        | 2.6077 | 3.516  | 4.8128 | 1.9265 | 2.9925 | 3.5647 | 1.3286 | 2.4386 | 3.9837 | 1.296  | 3.0255 | 8.3533  | 6.2879 | 2.0584 | 7.1957 |  | 9.1357  | 9.4570  |        |
| 13 |   |        |        |        | 1.5728 | 3.3836 | 1.9591 | 2.639  | 1.653  | 3.1346 | 1.144  | 2.0302 | 1.9075 | 1.4625 | 6.1065  | 6.2719 | 0.8764 | 6.6737 |  | 8.7697  | 7.9609  |        |
| 14 |   |        |        |        |        | 3.1466 | 3.2276 | 3.5747 | 2.0257 | 3.8435 | 1.9895 | 1.4833 | 2.8022 | 1.7384 | 4.9982  | 6.025  | 1.9926 | 6.7133 |  | 7.8377  | 7.7251  |        |
| 15 |   |        |        |        |        |        | 3.4473 | 2.7568 | 2.4901 | 5.1375 | 4.1277 | 3.2595 | 4.1311 | 4.1077 | 5.4617  | 3.6868 | 3.5994 | 6.5793 |  | 6.7601  | 7.0738  |        |
| 18 |   |        |        |        |        |        |        | 1.4088 | 2.1897 | 2.2201 | 2.4008 | 2.9845 | 1.2221 | 2.8341 | 6.6154  | 4.425  | 1.7018 | 6.3347 |  | 7.4309  | 7.4515  |        |
| 21 |   |        |        |        |        |        |        |        | 2.2845 | 3.0591 | 3.2774 | 3.1774 | 2.2822 | 3.608  | 6.2046  | 3.3632 | 2.5849 | 6.1063 |  | 6.2138  | 6.6221  |        |
| 22 |   |        |        |        |        |        |        |        |        | 4.1467 | 2.4898 | 1.7487 | 2.8609 | 2.4608 | 5.5242  | 4.5525 | 2.023  | 5.7391 |  | 8.3089  | 7.2815  |        |
| 28 |   |        |        |        |        |        |        |        |        |        | 3.062  | 5.2706 | 1.3308 | 3.8012 | 11.1075 | 7.7501 | 2.603  | 7.4974 |  | 10.2857 | 10.6814 |        |
| 29 |   |        |        |        |        |        |        |        |        |        |        | 2.7282 | 1.6611 | 1.1785 | 7.8386  | 7.572  | 1.0789 | 7.0872 |  | 12.6719 | 11.6972 |        |
| 30 |   |        |        |        |        |        |        |        |        |        |        |        | 2.7417 | 2.0874 | 4.9129  | 5.112  | 2.5465 | 7.3701 |  | 8.8904  | 6.6281  |        |
| 31 |   |        |        |        |        |        |        |        |        |        |        |        |        | 2.6965 | 9.0394  | 6.4166 | 1.5071 | 6.9327 |  | 9.8519  | 9.6402  |        |
| 32 |   |        |        |        |        |        |        |        |        |        |        |        |        |        | 6.9291  | 7.2322 | 1.6585 | 7.5033 |  | 11.328  | 10.0407 |        |
| 33 |   |        |        |        |        |        |        |        |        |        |        |        |        |        |         | 5.821  | 6.824  | 9.7267 |  | 10.4137 | 7.4806  |        |
| 34 |   |        |        |        |        |        |        |        |        |        |        |        |        |        |         |        | 6.2587 | 6.6166 |  | 4.9535  | 5.5669  |        |
| 35 |   |        |        |        |        |        |        |        |        |        |        |        |        |        |         |        |        | 6.6492 |  | 11.0657 | 10.4111 |        |
| 41 |   |        |        |        |        |        |        |        |        |        |        |        |        |        |         |        |        |        |  | 9.7865  | 10.2171 |        |
| 7  |   |        |        |        |        |        |        |        |        |        |        |        |        |        |         |        |        |        |  |         |         | 2.8882 |
| 37 |   |        |        |        |        |        |        |        |        |        |        |        |        |        |         |        |        |        |  |         |         |        |

## The extensive solid-form landscape of sulfathiazole: geometrical similarity and interaction energies

David S. Hughes, Ann L. Bingham, Michael B. Hursthouse, Terry L. Threlfall and Andrew D. Bond

### S5. CrystalCMP

#### CrystalCMP similarity matrices for clusters linked at $PS_{AB} < 15$ :

##### Group 3 (co-crystals)

|    | 56 | 57     | 58     | 59     |
|----|----|--------|--------|--------|
| 56 |    | 1.3479 | 1.7304 | 2.6460 |
| 57 |    |        | 0.8054 | 1.7462 |
| 58 |    |        |        | 1.2605 |
| 59 |    |        |        |        |

##### Group 4 (salts)

|    | 62 | 63     | 72     |
|----|----|--------|--------|
| 62 |    | 1.4198 | 3.7785 |
| 63 |    |        | 2.7226 |
| 72 |    |        |        |

##### Group 5 (co-crystals)

|    | 16 | 17     | 19     |
|----|----|--------|--------|
| 16 |    | 0.7764 | 3.7061 |
| 17 |    |        | 3.3173 |
| 18 |    |        |        |

##### Group 6 (salts)

|    | 71 | 85     |
|----|----|--------|
| 71 |    | 2.6403 |
| 85 |    |        |

##### Group 7 (salts)

|    | 69 | 73     |
|----|----|--------|
| 69 |    | 3.8504 |
| 73 |    |        |

##### Group 8 (co-crystals)

|    | 25 | 47     |
|----|----|--------|
| 25 |    | 9.7542 |
| 47 |    |        |

##### Group 9 (salts)\*\*

|    | 38 | 52     |
|----|----|--------|
| 38 |    | 4.1144 |
| 52 |    |        |

##### Group 10 (co-crystals)

|    | 39 | 40     |
|----|----|--------|
| 39 |    | 1.4640 |
| 40 |    |        |

##### Group 11 (salts)

|    | 77 | 79     |
|----|----|--------|
| 77 |    | 6.7122 |
| 79 |    |        |

##### Group 12 (salts)

|    | 66 | 88      |
|----|----|---------|
| 66 |    | 14.9780 |
| 88 |    |         |

\*\* Structure **50** is linked to Group 9 in the dendrogram, but is not considered to belong to this group – see main text.

## The extensive solid-form landscape of sulfathiazole: geometrical similarity and interaction energies

David S. Hughes, Ann L. Bingham, Michael B. Hursthouse, Terry L. Threlfall and Andrew D. Bond

### S6. COMPACT

← Packing Similarity Wizard

#### Select Options

Packing shell size

Size of molecular cluster to compare:  molecules

Filter comparisons that do not have all 15 molecules in common

Geometric tolerances

Distance tolerance:  %

Angle tolerance:  degrees

Default

Compare

Next

Cancel

← Packing Similarity Wizard

#### Select Options

When comparing crystals

Allow molecular differences

Allow structure inversion

Ignore hydrogen positions

Ignore each atom's hydrogen count

Ignore bond types

Ignore each atom's bond count

When comparing multi-component crystals

Ignore smallest molecular components

When comparing  $Z' > 1$  crystals

Show only the highest similarity result

Default

Compare

Next

Cancel

## The extensive solid-form landscape of sulfathiazole: geometrical similarity and interaction energies

David S. Hughes, Ann L. Bingham, Michael B. Hursthouse, Terry L. Threlfall and Andrew D. Bond

### S6. COMPACK

COMPACK (30%, 30°): full list of results is provided as an *Excel* archive.

#### Automatic grouping of 15-molecule similarity:

(Group numbers generated by COMPACK are not those in Table 2 in the manuscript, but the results are consistent).

| COMPACK_96_vs_96_30_30 |            |                |         |         |         |       |         |       |  | Options |
|------------------------|------------|----------------|---------|---------|---------|-------|---------|-------|--|---------|
| group                  | spacegroup | density (g/cc) | a       | b       | c       | alpha | beta    | gamma |  |         |
| group1                 |            |                |         |         |         |       |         |       |  |         |
| 66_SLFZ                | P21/c      | 0              | 8.081   | 16.676  | 13.169  | 90    | 104.56  | 90    |  |         |
| 88_SLFZ                | P21/c      | 0              | 8.8101  | 17.1707 | 13.2499 | 90    | 101.1   | 90    |  |         |
| group2                 |            |                |         |         |         |       |         |       |  |         |
| 69_SLFZ                | P212121    | 0              | 8.401   | 11.142  | 17.746  | 90    | 90      | 90    |  |         |
| 73_SLFZ                | P212121    | 0              | 8.4158  | 10.181  | 17.941  | 90    | 90      | 90    |  |         |
| group3                 |            |                |         |         |         |       |         |       |  |         |
| 37_SLFZ                | P21/c      | 0              | 8.39    | 18.813  | 9.54    | 90    | 102.54  | 90    |  |         |
| 7_SLFZ                 | P21/c      | 0              | 8.636   | 19.187  | 9.354   | 90    | 91.03   | 90    |  |         |
| group4                 |            |                |         |         |         |       |         |       |  |         |
| 38_SLFZ                | P21/c      | 0              | 8.167   | 12.443  | 15.632  | 90    | 96.88   | 90    |  |         |
| 52_SLFZ                | P21/c      | 0              | 8.2576  | 12.1531 | 16.5609 | 90    | 98.785  | 90    |  |         |
| group5                 |            |                |         |         |         |       |         |       |  |         |
| 39_SLFZ                | Pbca       | 0              | 9.045   | 16.864  | 39.421  | 90    | 90      | 90    |  |         |
| 40_SLFZ                | Pbca       | 0              | 9.179   | 16.907  | 39.202  | 90    | 90      | 90    |  |         |
| group6                 |            |                |         |         |         |       |         |       |  |         |
| 19_SLFZ                | P21/n      | 0              | 6.572   | 12.959  | 21.533  | 90    | 92.48   | 90    |  |         |
| 16_SLFZ                | P21/n      | 0              | 6.487   | 12.332  | 22.259  | 90    | 94.19   | 90    |  |         |
| 17_SLFZ                | P21/n      | 0              | 6.613   | 12.074  | 22.085  | 90    | 93.44   | 90    |  |         |
| group7                 |            |                |         |         |         |       |         |       |  |         |
| 25_SLFZ                | P212121    | 0              | 9.515   | 16.675  | 19.249  | 90    | 90      | 90    |  |         |
| 47_SLFZ                | Pbca       | 0              | 9.424   | 17.195  | 19.56   | 90    | 90      | 90    |  |         |
| group8                 |            |                |         |         |         |       |         |       |  |         |
| 71_SLFZ                | C2/c       | 0              | 17.723  | 11.684  | 11.938  | 90    | 91.78   | 90    |  |         |
| 85_SLFZ                | C2/c       | 0              | 17.4737 | 11.624  | 11.7557 | 90    | 90.072  | 90    |  |         |
| group9                 |            |                |         |         |         |       |         |       |  |         |
| 63_SLFZ                | P212121    | 0              | 6.592   | 15.155  | 15.689  | 90    | 90      | 90    |  |         |
| 72_SLFZ                | P212121    | 0              | 6.62    | 15.349  | 17.148  | 90    | 90      | 90    |  |         |
| 62_SLFZ                | P212121    | 0              | 6.948   | 14.868  | 15.958  | 90    | 90      | 90    |  |         |
| group10                |            |                |         |         |         |       |         |       |  |         |
| 77_SLFZ                | P21/c      | 0              | 7.8774  | 12.109  | 16.2492 | 90    | 105.532 | 90    |  |         |
| 79_SLFZ                | P21/c      | 0              | 8.0122  | 12.7431 | 16.7992 | 90    | 102.2   | 90    |  |         |
| group11                |            |                |         |         |         |       |         |       |  |         |
| 56_SLFZ                | P21/n      | 0              | 8.5007  | 18.8407 | 10.5066 | 90    | 104.507 | 90    |  |         |
| 57_SLFZ                | P21/n      | 0              | 8.3577  | 19.2806 | 10.9972 | 90    | 105.064 | 90    |  |         |
| 58_SLFZ                | P21/n      | 0              | 8.4031  | 19.2762 | 10.9624 | 90    | 106.229 | 90    |  |         |
| 59_SLFZ                | P21/n      | 0              | 8.3786  | 19.6447 | 11.1172 | 90    | 106.885 | 90    |  |         |
| group12                |            |                |         |         |         |       |         |       |  |         |
| 33_SLFZ                | P21/n      | 0              | 9.112   | 18.994  | 10.59   | 90    | 101.37  | 90    |  |         |
| 34_SLFZ                | P21/n      | 0              | 8.3551  | 18.88   | 10.7764 | 90    | 96.79   | 90    |  |         |
| 21_SLFZ                | P21/n      | 0              | 8.454   | 20.699  | 9.487   | 90    | 92.37   | 90    |  |         |
| 22_SLFZ                | P21/n      | 0              | 8.583   | 20.652  | 9.52    | 90    | 93.66   | 90    |  |         |
| 13_SLFZ                | P21/n      | 0              | 8.628   | 21.151  | 9.135   | 90    | 97.7    | 90    |  |         |
| 14_SLFZ                | P21/n      | 0              | 8.606   | 21.643  | 8.735   | 90    | 98.76   | 90    |  |         |
| 15_SLFZ                | P21/n      | 0              | 8.55    | 21.491  | 9.215   | 90    | 90.27   | 90    |  |         |
| 18_SLFZ                | P21/n      | 0              | 8.417   | 20.975  | 9.472   | 90    | 93.83   | 90    |  |         |
| 28_SLFZ                | P21/n      | 0              | 8.01    | 20.82   | 8.99    | 90    | 94.65   | 90    |  |         |
| 29_SLFZ                | P21/n      | 0              | 8.523   | 21.073  | 9.087   | 90    | 96.54   | 90    |  |         |
| 30_SLFZ                | P21/n      | 0              | 8.6785  | 19.911  | 10.0217 | 90    | 97.776  | 90    |  |         |
| 31_SLFZ                | P21/n      | 0              | 8.2478  | 21.0191 | 9.0739  | 90    | 96.534  | 90    |  |         |
| 32_SLFZ                | P21/n      | 0              | 8.4758  | 20.7179 | 9.6108  | 90    | 97.84   | 90    |  |         |
| 8_SLFZ                 | P21/n      | 0              | 8.392   | 21.207  | 9.302   | 90    | 93.12   | 90    |  |         |
| 11_SLFZ                | P21/n      | 0              | 8.366   | 21.353  | 9.097   | 90    | 93.37   | 90    |  |         |
| 12_SLFZ                | P21/n      | 0              | 8.194   | 21.111  | 9.57    | 90    | 94.2    | 90    |  |         |
| 35_SLFZ                | P21/n      | 0              | 8.363   | 21.146  | 9.116   | 90    | 95.76   | 90    |  |         |
| 41_SLFZ                | P21/c      | 0              | 12.213  | 20.55   | 13.583  | 90    | 97.03   | 90    |  |         |

## The extensive solid-form landscape of sulfathiazole: geometrical similarity and interaction energies

David S. Hughes, Ann L. Bingham, Michael B. Hursthouse, Terry L. Threlfall and Andrew D. Bond

### S6. COMPACK

COMPACK (30%, 30°): full list of results is provided as an *Excel* archive.

**Similarity matrices (RMSD. Not highlighted = 15 matched molecules matched. Highlighted = no. of matched molecules in parentheses):**

#### Group 1

|    | 8 | 11     | 12     | 13     | 14     | 15     | 18     | 21     | 22     | 28     | 29     | 30         | 31     | 32     | 33          | 34          | 35          | 41          |
|----|---|--------|--------|--------|--------|--------|--------|--------|--------|--------|--------|------------|--------|--------|-------------|-------------|-------------|-------------|
| 8  |   | 0.3179 | 0.4932 | 0.5115 | 0.6968 | 0.3362 | 0.4173 | 0.4292 | 0.2638 | 0.7475 | 0.5461 | 0.6864     | 0.6323 | 0.4785 | 1.0798 (13) | 1.1039      | 0.4477      | 0.7871      |
| 11 |   |        | 0.3684 | 0.3416 | 0.6330 | 0.5542 | 0.2789 | 0.3545 | 0.3657 | 0.4856 | 0.3461 | 0.7120     | 0.3697 | 0.4896 | 1.1877 (13) | 1.2576 (10) | 0.2628      | 0.7989      |
| 12 |   |        |        | 0.4891 | 0.8659 | 0.7550 | 0.2170 | 0.3465 | 0.4210 | 0.4488 | 0.4563 | 0.6227     | 0.4081 | 0.4669 | 1.2181 (13) | 1.1785 (10) | 0.3883      | 0.8031      |
| 13 |   |        |        |        | 0.4578 | 0.7562 | 0.4433 | 0.5634 | 0.4810 | 0.5164 | 0.1334 | 0.6736     | 0.3267 | 0.3753 | 1.1200 (13) | 1.3423 (10) | 0.1834      | 1.0096      |
| 14 |   |        |        |        |        | 0.8472 | 0.8342 | 0.9385 | 0.7851 | 0.8259 | 0.4995 | 0.9938     | 0.6594 | 0.6188 | 1.2717 (13) | 1.5916 (10) | 0.5046      | 1.2710      |
| 15 |   |        |        |        |        |        | 0.6679 | 0.631  | 0.4779 | 0.9983 | 0.7776 | 0.7679 (8) | 0.9043 | 0.7425 | 1.2220 (13) | 1.2918 (10) | 0.7023      | 0.7263      |
| 18 |   |        |        |        |        |        |        | 0.1751 | 0.3041 | 0.5125 | 0.4437 | 0.5445     | 0.4151 | 0.4678 | 1.0934 (13) | 1.1098 (10) | 0.3914      | 0.7185      |
| 21 |   |        |        |        |        |        |        |        | 0.2966 | 0.6210 | 0.5704 | 0.5568     | 0.5499 | 0.5737 | 1.0309 (13) | 1.0108      | 0.5182      | 0.6183      |
| 22 |   |        |        |        |        |        |        |        |        | 0.7272 | 0.5085 | 0.4830     | 0.6078 | 0.3963 | 0.9174 (13) | 1.0053      | 0.4504      | 0.6944      |
| 28 |   |        |        |        |        |        |        |        |        |        | 0.4376 | 0.7049 (8) | 0.2368 | 0.6868 | 1.4423 (13) | 1.4529 (10) | 0.4177      | 1.0089      |
| 29 |   |        |        |        |        |        |        |        |        |        |        | 0.7221     | 0.2877 | 0.4114 | 1.1890 (13) | 1.3839 (10) | 0.1359      | 0.9869      |
| 30 |   |        |        |        |        |        |        |        |        |        |        |            | 0.7574 | 0.4501 | 0.6516      | 0.7836      | 0.7074      | 0.9986      |
| 31 |   |        |        |        |        |        |        |        |        |        |        |            |        | 0.5241 | 1.2803 (13) | 1.3625 (10) | 0.2780      | 0.9979      |
| 32 |   |        |        |        |        |        |        |        |        |        |        |            |        |        | 0.9815 (14) | 1.0920      | 0.3735      | 0.9850      |
| 33 |   |        |        |        |        |        |        |        |        |        |        |            |        |        |             | 0.6485      | 1.1914 (13) | 1.2906 (14) |
| 34 |   |        |        |        |        |        |        |        |        |        |        |            |        |        |             |             | 1.3322 (10) | 1.2830 (10) |
| 35 |   |        |        |        |        |        |        |        |        |        |        |            |        |        |             |             |             | 0.9437      |
| 41 |   |        |        |        |        |        |        |        |        |        |        |            |        |        |             |             |             |             |

## The extensive solid-form landscape of sulfathiazole: geometrical similarity and interaction energies

David S. Hughes, Ann L. Bingham, Michael B. Hursthouse, Terry L. Threlfall and Andrew D. Bond

### S6. COMPACK

COMPACK (30%, 30°): full list of results is provided as an *Excel* archive.

#### Similarity matrices (RMSD, 15 molecules matched):

##### Group 2 (co-crystals)

|    | 7 | 37     |
|----|---|--------|
| 7  |   | 0.9113 |
| 37 |   |        |

##### Group 3 (co-crystals)

|    | 56 | 57     | 58     | 59     |
|----|----|--------|--------|--------|
| 56 |    | 0.2955 | 0.2971 | 0.4661 |
| 57 |    |        | 0.0937 | 0.2334 |
| 58 |    |        |        | 0.1900 |
| 59 |    |        |        |        |

##### Group 4 (salts)

|    | 62 | 63     | 72     |
|----|----|--------|--------|
| 62 |    | 0.3177 | 0.8474 |
| 63 |    |        | 0.7503 |
| 72 |    |        |        |

##### Group 5 (co-crystals)

|    | 16 | 17     | 19     |
|----|----|--------|--------|
| 16 |    | 0.1676 | 0.5991 |
| 17 |    |        | 0.6199 |
| 18 |    |        |        |

##### Group 6 (salts)

|    | 71 | 85     |
|----|----|--------|
| 71 |    | 0.2950 |
| 85 |    |        |

##### Group 7 (salts)

|    | 69 | 73     |
|----|----|--------|
| 69 |    | 0.5222 |
| 73 |    |        |

##### Group 8 (co-crystals)

|    | 25 | 47     |
|----|----|--------|
| 25 |    | 0.6716 |
| 47 |    |        |

##### Group 9 (salts)

|    | 38 | 52     |
|----|----|--------|
| 38 |    | 0.5869 |
| 52 |    |        |

##### Group 10 (co-crystals)

|    | 39 | 40     |
|----|----|--------|
| 39 |    | 0.1477 |
| 40 |    |        |

##### Group 11 (salts)

|    | 77 | 79     |
|----|----|--------|
| 77 |    | 0.5568 |
| 79 |    |        |

##### Group 12 (salts)

|    | 66 | 88     |
|----|----|--------|
| 66 |    | 1.1390 |
| 88 |    |        |

## The extensive solid-form landscape of sulfathiazole: geometrical similarity and interaction energies

David S. Hughes, Ann L. Bingham, Michael B. Hursthouse, Terry L. Threlfall and Andrew D. Bond

### S7. XPac

#### Summary of supramolecular constructs (SCs) identified in the polymorphs using “high” tolerances ( $\delta_{\text{ang}} = 12$ , $\delta_{\text{dhd}} = 18^\circ$ ).

Symmetry operators/axis directions refer to the structure indicated in the row (e.g. **1p**:1555\_01,3676\_01 matches to **3p**:1555\_01,3657\_01)

Key: 0-D = pink, 1-D = amber, 2-D = blue, 3-D = green

|    | 1p                 | 2p                 | 3p                 | 4p                 | 5p                 |
|----|--------------------|--------------------|--------------------|--------------------|--------------------|
| 1p |                    | —                  | 1555_01<br>3676_01 | 1555_01<br>3676_01 | —                  |
| 2p | —                  |                    | 1555_02<br>3667_02 | 1555_02<br>3667_02 | 1555_02<br>3667_02 |
| 3p | 1555_01<br>3657_01 | 1555_01<br>4555_02 |                    | [010]<br>[001]     | [010]<br>[001]     |
| 4p | 1555_01<br>3676_01 | 1555_01<br>3576_01 | [010]<br>[001]     |                    | [010]<br>[001]     |
| 5p | —                  | 1555_01<br>3677_01 | [010]<br>[101]     | [010]<br>[101]     |                    |



## The extensive solid-form landscape of sulfathiazole: geometrical similarity and interaction energies

David S. Hughes, Ann L. Bingham, Michael B. Hursthouse, Terry L. Threlfall and Andrew D. Bond

### S7. XPac

#### Comparison of the 91 multi-component structures vs the polymorphs using “high” tolerances ( $\delta_{\text{ang.}} = 12$ , $\delta_{\text{dhd}} = 18^\circ$ ).

Symmetry codes of the matching molecules refer to the structures of the polymorphs. Key: 0-D = pink, 1-D = amber, 2-D = blue, 3-D = green

|    | 1p_01              | 1p_02              | 2p_01              | 2p_02              | 3p_01              | 3p_02              | 4p                                     | 5p                                           |
|----|--------------------|--------------------|--------------------|--------------------|--------------------|--------------------|----------------------------------------|----------------------------------------------|
| 1  | 1555_01<br>3776_01 | 1555_02<br>3755_02 | 1555_01<br>3666_01 | 1555_02<br>3567_02 |                    | 1555_02<br>3767_02 |                                        | 1555_01<br>3577_01<br><br>1555_01<br>3676_01 |
| 2  |                    |                    |                    |                    | 1555_01<br>2646_02 |                    | [100]<br>1555_01<br>1455_01<br>1655_01 |                                              |
| 3  |                    |                    |                    |                    | 1555_01<br>2646_02 |                    | [100]<br>1555_01<br>1455_01<br>1655_01 |                                              |
| 4  | NO MATCH           |                    |                    |                    |                    |                    |                                        |                                              |
| 5  | 1555_01<br>3776_01 | 1555_02<br>3755_02 |                    |                    |                    |                    | [100]<br>1555_01<br>1455_01<br>1655_01 |                                              |
| 6  | 1555_01<br>3776_01 | 1555_02<br>3755_02 |                    |                    |                    |                    |                                        |                                              |
| 7  | 1555_01<br>3776_01 | 1555_02<br>3755_02 |                    |                    |                    |                    |                                        |                                              |
| 8  | 1555_01<br>3776_01 | 1555_02<br>3755_02 |                    |                    |                    |                    |                                        |                                              |
| 9  | 1555_01<br>3776_01 | 1555_02<br>3755_02 |                    |                    |                    |                    |                                        |                                              |
| 10 |                    |                    |                    |                    |                    |                    | 1555_01<br>3666_01                     |                                              |
| 11 | 1555_01<br>3776_01 | 1555_02<br>3755_02 |                    |                    |                    |                    |                                        |                                              |

## The extensive solid-form landscape of sulfathiazole: geometrical similarity and interaction energies

David S. Hughes, Ann L. Bingham, Michael B. Hursthouse, Terry L. Threlfall and Andrew D. Bond

### Comparison of the 91 multi-component structures vs the polymorphs using “high” tolerances ( $\delta_{\text{ang}} = 12$ , $\delta_{\text{dhd}} = 18^\circ$ ).

Symmetry codes of the matching molecules refer to the structures of the polymorphs. Key: 0-D = pink, 1-D = amber, 2-D = blue, 3-D = green

|    | 1p_01              | 1p_02                                    | 2p_01              | 2p_02              | 3p_01              | 3p_02 | 4p                 | 5p |
|----|--------------------|------------------------------------------|--------------------|--------------------|--------------------|-------|--------------------|----|
| 12 | 1555_01<br>3776_01 | 1555_02<br>3755_02                       |                    |                    |                    |       |                    |    |
| 13 | 1555_01<br>3776_01 | 1555_02<br>3755_02                       |                    |                    |                    |       |                    |    |
| 14 | 1555_01<br>3776_01 | 1555_02<br>3755_02                       |                    |                    |                    |       |                    |    |
| 15 | 1555_01<br>3776_01 | 1555_02<br>3755_02                       |                    |                    |                    |       |                    |    |
| 16 | 1555_01<br>3776_01 | 1555_02<br>3755_02                       |                    |                    |                    |       |                    |    |
| 17 | 1555_01<br>3776_01 | 1555_02<br>3755_02                       |                    |                    |                    |       |                    |    |
| 18 | 1555_01<br>3776_01 | 1555_02<br>3755_02                       |                    |                    |                    |       |                    |    |
| 19 | 1555_01<br>3776_01 | 1555_02<br>3755_02                       |                    |                    |                    |       |                    |    |
| 20 | 1555_01<br>3776_01 | 1555_02<br>3755_02                       | 1555_01<br>3666_01 | 1555_02<br>3567_02 |                    |       |                    |    |
| 21 | 1555_01<br>3776_01 | 1555_02<br>3755_02                       |                    |                    |                    |       |                    |    |
| 22 | 1555_01<br>3776_01 | 1555_02<br>3755_02                       |                    |                    |                    |       |                    |    |
| 23 | 1555_01<br>3776_01 | 1555_02<br>3755_02<br>1555_02<br>3655_02 | 1555_01<br>3666_01 |                    | 1555_01<br>3657_01 |       | 1555_01<br>3676_01 |    |
| 24 | 1555_01<br>3776_01 | 1555_02<br>3755_02                       |                    |                    |                    |       |                    |    |
| 25 | 1555_01<br>3776_01 | 1555_02<br>3755_02                       |                    |                    |                    |       |                    |    |
| 26 | NO MATCH           |                                          |                    |                    |                    |       |                    |    |

## The extensive solid-form landscape of sulfathiazole: geometrical similarity and interaction energies

David S. Hughes, Ann L. Bingham, Michael B. Hursthouse, Terry L. Threlfall and Andrew D. Bond

### Comparison of the 91 multi-component structures vs the polymorphs using “high” tolerances ( $\delta_{\text{ang}} = 12$ , $\delta_{\text{dhd}} = 18^\circ$ ).

Symmetry codes of the matching molecules refer to the structures of the polymorphs. Key: 0-D = pink, 1-D = amber, 2-D = blue, 3-D = green

|    | 1p_01              | 1p_02              | 2p_01 | 2p_02 | 3p_01                                             | 3p_02 | 4p                                     | 5p                                     |
|----|--------------------|--------------------|-------|-------|---------------------------------------------------|-------|----------------------------------------|----------------------------------------|
| 27 | 1555_01<br>3776_01 | 1555_02<br>3755_02 |       |       |                                                   |       |                                        |                                        |
| 28 | 1555_01<br>3776_01 | 1555_02<br>3755_02 |       |       |                                                   |       |                                        |                                        |
| 29 | 1555_01<br>3776_01 | 1555_02<br>3755_02 |       |       |                                                   |       |                                        |                                        |
| 30 | 1555_01<br>3776_01 | 1555_02<br>3755_02 |       |       |                                                   |       |                                        |                                        |
| 31 | 1555_01<br>3776_01 | 1555_02<br>3755_02 |       |       |                                                   |       |                                        |                                        |
| 32 | 1555_01<br>3776_01 | 1555_02<br>3755_02 |       |       |                                                   |       |                                        |                                        |
| 33 | 1555_01<br>3776_01 | 1555_02<br>3755_02 |       |       |                                                   |       |                                        |                                        |
| 34 | 1555_01<br>3776_01 | 1555_02<br>3755_02 |       |       |                                                   |       |                                        |                                        |
| 35 | 1555_01<br>3776_01 | 1555_02<br>3755_02 |       |       |                                                   |       |                                        |                                        |
| 36 | 1555_01<br>3776_01 | 1555_02<br>3755_02 |       |       | [100]<br>1555_01<br>2746_02<br>2646_02<br>1655_01 |       | [100]<br>1555_01<br>1455_01<br>1655_01 | [100]<br>1555_01<br>1455_01<br>1655_01 |
| 37 | 1555_01<br>3776_01 | 1555_02<br>3755_02 |       |       |                                                   |       |                                        |                                        |
| 38 | 1555_01<br>3776_01 | 1555_02<br>3755_02 |       |       | 1555_01<br>2646_02                                |       | [100]<br>1555_01<br>1455_01<br>1655_01 |                                        |
| 39 |                    | 1555_02<br>3655_02 |       |       |                                                   |       |                                        |                                        |
| 40 | NO MATCH           |                    |       |       |                                                   |       |                                        |                                        |

## The extensive solid-form landscape of sulfathiazole: geometrical similarity and interaction energies

David S. Hughes, Ann L. Bingham, Michael B. Hursthouse, Terry L. Threlfall and Andrew D. Bond

### Comparison of the 91 multi-component structures vs the polymorphs using “high” tolerances ( $\delta_{\text{ang}} = 12$ , $\delta_{\text{dhd}} = 18^\circ$ ).

Symmetry codes of the matching molecules refer to the structures of the polymorphs. Key: 0-D = pink, 1-D = amber, 2-D = blue, 3-D = green

|    | 1p_01              | 1p_02                                                          | 2p_01              | 2p_02 | 3p_01              | 3p_02              | 4p                                            | 5p                 |
|----|--------------------|----------------------------------------------------------------|--------------------|-------|--------------------|--------------------|-----------------------------------------------|--------------------|
| 41 | 1555_01<br>3776_01 | 1555_02<br>3755_02                                             |                    |       |                    |                    |                                               |                    |
| 42 |                    | 1555_02<br>3655_02                                             | 1555_01<br>3666_01 |       | 1555_01<br>2646_02 |                    | <b>[100]</b><br>1555_01<br>1455_01<br>1655_01 |                    |
| 43 |                    |                                                                |                    |       | 1555_01<br>2646_02 |                    | <b>[100]</b><br>1555_01<br>1455_01<br>1655_01 |                    |
| 44 | 1555_01<br>3776_01 | 1555_02<br>3755_02                                             |                    |       |                    | 1555_02<br>3767_02 |                                               | 1555_01<br>3676_01 |
| 45 |                    | 1555_02<br>3655_02                                             |                    |       |                    |                    |                                               |                    |
| 46 | 1555_01<br>3776_01 | <b>[010] [001]</b><br>1555_02<br>2745_02<br>2755_02<br>3755_02 |                    |       |                    |                    |                                               |                    |
| 47 | 1555_01<br>3776_01 | 1555_02<br>3755_02                                             |                    |       |                    |                    |                                               |                    |
| 48 |                    |                                                                |                    |       | 1555_01<br>2646_02 |                    | <b>[100]</b><br>1555_01<br>1455_01<br>1655_01 |                    |
| 49 | 1555_01<br>3676_01 |                                                                |                    |       | 1555_01<br>3657_01 |                    | 1555_01<br>3676_01                            |                    |
| 50 | 1555_01<br>3776_01 | 1555_02<br>3755_02                                             |                    |       | 1555_01<br>2646_02 |                    | <b>[100]</b><br>1555_01<br>1455_01<br>1655_01 |                    |
| 51 | <b>NO MATCH</b>    |                                                                |                    |       |                    |                    |                                               |                    |

**The extensive solid-form landscape of sulfathiazole: geometrical similarity and interaction energies**

David S. Hughes, Ann L. Bingham, Michael B. Hursthouse, Terry L. Threlfall and Andrew D. Bond

**Comparison of the 91 multi-component structures vs the polymorphs using “high” tolerances ( $\delta_{ang} = 12$ ,  $\delta_{dhd} = 18^\circ$ ).**

Symmetry codes of the matching molecules refer to the structures of the polymorphs. Key: 0-D = pink, 1-D = amber, 2-D = blue, 3-D = green

|    | 1p_01              | 1p_02              | 2p_01              | 2p_02              | 3p_01              | 3p_02              | 4p                                            | 5p                 |
|----|--------------------|--------------------|--------------------|--------------------|--------------------|--------------------|-----------------------------------------------|--------------------|
| 52 | 1555_01<br>3776_01 | 1555_02<br>3755_02 |                    |                    | 1555_01<br>2646_02 |                    | <b>[100]</b><br>1555_01<br>1455_01<br>1655_01 |                    |
| 53 | 1555_01<br>3776_01 | 1555_02<br>3755_02 |                    |                    | 1555_01<br>4565_02 |                    | 1555_01<br>3566_01                            | 1555_01<br>3667_01 |
| 54 | 1555_01<br>3776_01 | 1555_02<br>3755_02 |                    |                    |                    | 1555_02<br>3767_02 |                                               | 1555_01<br>3676_01 |
| 55 |                    |                    |                    | 1555_02<br>3567_02 |                    |                    |                                               |                    |
| 56 |                    | 1555_02<br>3655_02 | 1555_01<br>3666_01 | 1555_02<br>3567_02 | 1555_01<br>2646_02 |                    | <b>[100]</b><br>1555_01<br>1455_01<br>1655_01 |                    |
| 57 |                    | 1555_02<br>3655_02 | 1555_01<br>3666_01 |                    | 1555_01<br>2646_02 |                    | <b>[100]</b><br>1555_01<br>1455_01<br>1655_01 |                    |
| 58 |                    | 1555_02<br>3655_02 | 1555_01<br>3666_01 | 1555_02<br>3567_02 | 1555_01<br>2646_02 |                    | <b>[100]</b><br>1555_01<br>1455_01<br>1655_01 |                    |
| 59 |                    | 1555_02<br>3655_02 | 1555_01<br>3666_01 | 1555_02<br>3567_02 | 1555_01<br>2646_02 |                    | <b>[100]</b><br>1555_01<br>1455_01<br>1655_01 |                    |
| 60 | <b>NO MATCH</b>    |                    |                    |                    |                    |                    |                                               |                    |
| 61 | <b>NO MATCH</b>    |                    |                    |                    |                    |                    |                                               |                    |
| 62 | <b>NO MATCH</b>    |                    |                    |                    |                    |                    |                                               |                    |
| 63 | <b>NO MATCH</b>    |                    |                    |                    |                    |                    |                                               |                    |

## The extensive solid-form landscape of sulfathiazole: geometrical similarity and interaction energies

David S. Hughes, Ann L. Bingham, Michael B. Hursthouse, Terry L. Threlfall and Andrew D. Bond

### Comparison of the 91 multi-component structures vs the polymorphs using “high” tolerances ( $\delta_{\text{ang}} = 12$ , $\delta_{\text{dhd}} = 18^\circ$ ).

Symmetry codes of the matching molecules refer to the structures of the polymorphs. Key: 0-D = pink, 1-D = amber, 2-D = blue, 3-D = green

|    | 1p_01                                  | 1p_02 | 2p_01                                  | 2p_02              | 3p_01                                                                | 3p_02                                                        | 4p                                                           | 5p                                                           |
|----|----------------------------------------|-------|----------------------------------------|--------------------|----------------------------------------------------------------------|--------------------------------------------------------------|--------------------------------------------------------------|--------------------------------------------------------------|
| 64 |                                        |       |                                        |                    | 1555_01<br>2646_02                                                   |                                                              | [100]<br>1555_01<br>1455_01<br>1655_01                       |                                                              |
| 65 | [010]<br>1555_01<br>2645_01<br>2655_01 |       | [100]<br>1555_01<br>1455_01<br>1655_01 |                    |                                                                      |                                                              |                                                              |                                                              |
| 66 |                                        |       |                                        |                    | [010]<br>1555_01<br>1565_01<br>1545_01                               | [010]<br>1555_02<br>1565_02<br>1545_02<br>3777_02<br>3767_02 | [010]<br>1555_01<br>1545_01<br>1565_01                       | [010]<br>1555_01<br>1545_01<br>1565_01<br>3666_01<br>3676_01 |
| 67 |                                        |       |                                        |                    | 1555_01<br>2646_02<br>4464_02                                        |                                                              | [100]<br>1555_01<br>1455_01<br>1655_01                       | 1555_01<br>3666_01                                           |
| 68 |                                        |       | 1555_01<br>3766_01                     | 1555_02<br>3667_02 | [010] ++<br>1555_01, 1545_01<br>1565_01, 4555_02<br>4565_02, 4545_02 |                                                              | [010]<br>1555_01<br>1545_01<br>1565_01<br>3566_01<br>3576_01 | [010]<br>1555_01<br>1545_01<br>1565_01<br>3667_01<br>3677_01 |
| 69 |                                        |       |                                        |                    | 1555_01<br>2646_02                                                   |                                                              | [100]<br>1555_01<br>1455_01<br>1655_01                       |                                                              |
| 70 |                                        |       |                                        |                    |                                                                      | 1555_02<br>3767_02                                           |                                                              | 1555_01<br>3676_01                                           |
| 71 |                                        |       |                                        |                    | 1555_01<br>2746_02                                                   |                                                              |                                                              | [100]<br>1555_01<br>1455_01<br>1655_01                       |

## The extensive solid-form landscape of sulfathiazole: geometrical similarity and interaction energies

David S. Hughes, Ann L. Bingham, Michael B. Hursthouse, Terry L. Threlfall and Andrew D. Bond

### Comparison of the 91 multi-component structures vs the polymorphs using “high” tolerances ( $\delta_{\text{ang}} = 12$ , $\delta_{\text{dhd}} = 18^\circ$ ).

Symmetry codes of the matching molecules refer to the structures of the polymorphs. Key: 0-D = pink, 1-D = amber, 2-D = blue, 3-D = green

|    | 1p_01              | 1p_02 | 2p_01              | 2p_02              | 3p_01                                                                                                           | 3p_02 | 4p                                                           | 5p                                                                                                                                                                                     |
|----|--------------------|-------|--------------------|--------------------|-----------------------------------------------------------------------------------------------------------------|-------|--------------------------------------------------------------|----------------------------------------------------------------------------------------------------------------------------------------------------------------------------------------|
| 72 | NO MATCH           |       |                    |                    |                                                                                                                 |       |                                                              |                                                                                                                                                                                        |
| 73 |                    |       |                    |                    | 1555_01<br>2646_02                                                                                              |       | [100]<br>1555_01<br>1455_01<br>1655_01                       |                                                                                                                                                                                        |
| 74 |                    |       | 1555_01<br>3766_01 | 1555_02<br>3667_02 | [010] [001]<br>1555_01, 1565_01<br>1545_01, 3767_01<br>3757_01, 4555_02<br>4565_02, 4545_02<br>2747_02, 2737_02 |       | [010]<br>1555_01<br>1545_01<br>1565_01<br>3566_01<br>3576_01 | <b>3-D</b><br>The mafenide sulfathiazole cations occupy comparable crystallographic sites to SLFZ. Hence, the SLFZ molecules in <b>74</b> overlay half of the molecules in <b>5p</b> . |
| 75 |                    |       | 1555_01<br>3666_01 |                    | 1555_01<br>2646_02                                                                                              |       | [100]<br>1555_01<br>1455_01<br>1655_01                       |                                                                                                                                                                                        |
| 76 |                    |       |                    | 1555_02<br>3567_02 | 1555_01<br>4565_02                                                                                              |       | 1555_01<br>3566_01                                           | 1555_01<br>3667_01                                                                                                                                                                     |
| 77 |                    |       |                    |                    | 1555_01<br>4565_02                                                                                              |       | 1555_01<br>3566_01                                           | 1555_01<br>3667_01                                                                                                                                                                     |
| 78 |                    |       | 1555_01<br>3666_01 | 1555_02<br>3567_02 |                                                                                                                 |       |                                                              |                                                                                                                                                                                        |
| 79 |                    |       |                    |                    | 1555_01<br>4565_02                                                                                              |       | 1555_01<br>3566_01                                           | 1555_01<br>3667_01                                                                                                                                                                     |
| 80 | 1555_01<br>3676_01 |       |                    |                    |                                                                                                                 |       |                                                              |                                                                                                                                                                                        |
| 81 |                    |       | 1555_01<br>3766_01 | 1555_02<br>3667_02 | [010]<br>1555_01, 1545_01<br>1565_01, 4555_02<br>4565_02, 3767_02<br>3777_02, 3757_02<br>2757_01, 2747_01       |       | [010]<br>1555_01<br>1545_01<br>1565_01<br>3566_01<br>3576_01 | [010] [101]<br>1555_01, 1545_01<br>1565_01, 2646_01<br>2656_01, 3667_01<br>3677_01, 4465_01<br>4564_01                                                                                 |

**The extensive solid-form landscape of sulfathiazole: geometrical similarity and interaction energies**

David S. Hughes, Ann L. Bingham, Michael B. Hursthouse, Terry L. Threlfall and Andrew D. Bond

**Comparison of the 91 multi-component structures vs the polymorphs using “high” tolerances ( $\delta_{\text{ang}} = 12$ ,  $\delta_{\text{dhd}} = 18^\circ$ ).**

Symmetry codes of the matching molecules refer to the structures of the polymorphs. Key: 0-D = pink, 1-D = amber, 2-D = blue, 3-D = green

|    | 1p_01    | 1p_02              | 2p_01              | 2p_02              | 3p_01                                    | 3p_02                                             | 4p                                                           | 5p                                                |
|----|----------|--------------------|--------------------|--------------------|------------------------------------------|---------------------------------------------------|--------------------------------------------------------------|---------------------------------------------------|
| 82 | NO MATCH |                    |                    |                    |                                          |                                                   |                                                              |                                                   |
| 83 |          |                    | 1555_01<br>3766_01 | 1555_02<br>3667_02 | 1555_01<br>2646_02<br>3657_01<br>4555_02 |                                                   | [100]<br>1555_01<br>1455_01<br>1655_01<br>3576_01<br>3676_01 | 1555_01<br>3677_01                                |
| 84 |          |                    |                    | 1555_02<br>3567_02 | 1555_01<br>4565_02                       |                                                   | 1555_01<br>3566_01                                           | 1555_01<br>3677_01                                |
| 85 |          |                    |                    |                    | 1555_01<br>2746_02                       |                                                   |                                                              | [100]<br>1555_01<br>1455_01<br>1655_01            |
| 86 |          |                    |                    |                    | 1555_01<br>2646_02                       |                                                   | [100]<br>1555_01<br>1455_01<br>1655_01                       |                                                   |
| 87 | NO MATCH |                    |                    |                    |                                          |                                                   |                                                              |                                                   |
| 88 |          |                    |                    |                    | [010]<br>1555_01<br>1545_01<br>1565_01   | [010]<br>1555_02<br>1545_02<br>1565_02<br>3767_02 | [010]<br>1555_01<br>1545_01<br>1565_01                       | [010]<br>1555_01<br>1545_01<br>1565_01<br>3676_01 |
| 89 |          | 1555_02<br>3655_02 |                    |                    | 1555_01<br>3767_01                       |                                                   |                                                              | 1555_01<br>3567_01                                |
| 90 |          |                    | 1555_01<br>3666_01 | 1555_02<br>3567_02 | 1555_01<br>2646_02                       |                                                   | [100]<br>1555_01<br>1455_01<br>1655_01                       | 1555_01<br>3577_01                                |
| 91 | NO MATCH |                    |                    |                    |                                          |                                                   |                                                              |                                                   |



## The extensive solid-form landscape of sulfathiazole: geometrical similarity and interaction energies

David S. Hughes, Ann L. Bingham, Michael B. Hursthouse, Terry L. Threlfall and Andrew D. Bond

### S8. Unit-cell parameters for the largest isostructural group in the multi-component crystals

|    | Space group        | a (Å)  | b (Å)  | c (Å)  | $\alpha$ (°) | $\beta$ (°) | $\gamma$ (°) | Vol (Å <sup>3</sup> ) | Solvent                                            | Z' (SLFZ:solv) |
|----|--------------------|--------|--------|--------|--------------|-------------|--------------|-----------------------|----------------------------------------------------|----------------|
| 8  | P2 <sub>1</sub> /n | 8.392  | 21.207 | 9.302  | 90           | 93.12       | 90           | 1653.0                | C <sub>5</sub> H <sub>8</sub> O <sub>2</sub>       | 1:1            |
| 11 | P2 <sub>1</sub> /n | 8.366  | 21.353 | 9.097  | 90           | 93.37       | 90           | 1622.3                | C <sub>4</sub> H <sub>5</sub> NO                   | 1:1            |
| 12 | P2 <sub>1</sub> /n | 8.194  | 21.111 | 9.570  | 90           | 94.20       | 90           | 1651.0                | C <sub>5</sub> H <sub>6</sub> O <sub>3</sub>       | 1:1            |
| 13 | P2 <sub>1</sub> /n | 8.628  | 21.151 | 9.135  | 90           | 97.70       | 90           | 1652.0                | C <sub>4</sub> H <sub>6</sub> O <sub>3</sub>       | 1:1            |
| 14 | P2 <sub>1</sub> /n | 8.606  | 21.643 | 8.735  | 90           | 98.76       | 90           | 1608.0                | C <sub>4</sub> H <sub>6</sub> O <sub>2</sub>       | 1:1            |
| 15 | P2 <sub>1</sub> /n | 8.550  | 21.491 | 9.215  | 90           | 89.73       | 90           | 1693.2                | C <sub>6</sub> H <sub>10</sub> O                   | 1:1            |
| 18 | P2 <sub>1</sub> /n | 8.417  | 20.975 | 9.472  | 90           | 93.83       | 90           | 1668.5                | C <sub>5</sub> H <sub>8</sub> O <sub>2</sub>       | 1:1            |
| 21 | P2 <sub>1</sub> /n | 8.454  | 20.699 | 9.487  | 90           | 92.37       | 90           | 1658.7                | C <sub>5</sub> H <sub>8</sub> O                    | 1:1            |
| 22 | P2 <sub>1</sub> /n | 8.583  | 20.652 | 9.520  | 90           | 93.66       | 90           | 1684.0                | C <sub>5</sub> H <sub>8</sub> O <sub>2</sub>       | 1:1            |
| 28 | P2 <sub>1</sub> /n | 8.010  | 20.820 | 8.990  | 90           | 94.65       | 90           | 1494.3                | NC(CH <sub>2</sub> ) <sub>6</sub> CN               | 1:0.5          |
| 29 | P2 <sub>1</sub> /n | 8.523  | 21.073 | 9.0867 | 90           | 96.54       | 90           | 1621.5                | NC(CH <sub>2</sub> ) <sub>8</sub> CN               | 1:0.5          |
| 30 | P2 <sub>1</sub> /n | 8.679  | 19.911 | 10.022 | 90           | 97.78       | 90           | 1715.8                | C <sub>12</sub> H <sub>20</sub> N <sub>2</sub>     | 1:0.5          |
| 31 | P2 <sub>1</sub> /n | 8.248  | 21.019 | 9.074  | 90           | 96.53       | 90           | 1562.8                | CH <sub>3</sub> (CH <sub>2</sub> ) <sub>2</sub> CN | 1:1            |
| 32 | P2 <sub>1</sub> /n | 8.476  | 20.718 | 9.611  | 90           | 97.84       | 90           | 1671.9                | CH <sub>3</sub> (CH <sub>2</sub> ) <sub>3</sub> CN | 1:1            |
| 33 | P2 <sub>1</sub> /n | 9.112  | 18.994 | 10.590 | 90           | 101.37      | 90           | 1796.9                | C <sub>6</sub> H <sub>11</sub> CN                  | 1:1            |
| 34 | P2 <sub>1</sub> /n | 8.355  | 18.880 | 10.776 | 90           | 96.79       | 90           | 1687.9                | C <sub>5</sub> H <sub>8</sub> N <sub>2</sub> O     | 1:1            |
| 35 | P2 <sub>1</sub> /n | 8.363  | 21.146 | 9.116  | 90           | 95.76       | 90           | 1604.0                | C <sub>9</sub> H <sub>14</sub> N <sub>2</sub>      | 1:0.5          |
| 41 | P2 <sub>1</sub> /c | 12.213 | 20.550 | 13.583 | 90           | 97.03       | 90           | 3383.4                | C <sub>5</sub> H <sub>8</sub> N <sub>2</sub>       | 2:2            |
|    |                    |        |        |        |              |             |              |                       |                                                    |                |
| 7  | P2 <sub>1</sub> /c | 8.636  | 19.187 | 9.354  | 90           | 91.03       | 90           | 1549.7                | C <sub>4</sub> H <sub>6</sub> O <sub>2</sub>       | 1:1            |
| 37 | P2 <sub>1</sub> /c | 8.390  | 18.813 | 9.540  | 90           | 102.54      | 90           | 1469.9                | C <sub>4</sub> H <sub>4</sub> N <sub>2</sub>       | 1:1            |

## The extensive solid-form landscape of sulfathiazole: geometrical similarity and interaction energies

David S. Hughes, Ann L. Bingham, Michael B. Hursthouse, Terry L. Threlfall and Andrew D. Bond

### S9. Pairwise PIXEL energies ( $\text{kJ mol}^{-1}$ ) derived from the DFT-minimised polymorphs, listing $|E(\text{total})| > 5 \text{ kJ mol}^{-1}$

[Centroid-centroid distances (Å) are geometric (not mass-weighted), and calculated using all atoms in the molecule (including H).

Frequency refers to no. of structures (out of 96) in which the pair is identified using the “Crystal Packing Feature” search in Mercury, tol: 30%, 30°]

#### Polymorph 1 (P2<sub>1</sub>/c, Z' = 2)

Molecule 1, ARU: 1\_555\_01, centroid: 0.7561, 0.7992, 0.3688

Symmetry operators: [1] x,y,z; [2] -x,1/2+y,1/2-z; [3] -x,-y,-z; [4] x,1/2-y,1/2+z

|      | ARU      | Centroid x | Centroid y | Centroid z | Cent-cent distance (Å) | Coulomb | Polarisation | Dispersion | Repulsion | Total  | Frequency (Mercury) |
|------|----------|------------|------------|------------|------------------------|---------|--------------|------------|-----------|--------|---------------------|
| [1]  | 3_776_01 | 0.7561     | 1.2008     | 0.6312     | 7.720                  | -176.2  | -100.7       | -55.7      | +185.3    | -147.3 | 42                  |
| [2]  | 2_645_01 | 1.2439     | 0.2992     | 0.1312     | 8.613                  | -41.6   | -16.5        | -19.4      | +39.2     | -38.2  | 6                   |
| [3]  | 2_655_01 | 0.2439     | 1.2992     | 0.1312     | 8.613                  | -41.6   | -16.5        | -19.4      | +39.2     | -38.2  | 3                   |
| [4]  | 4_555_02 | 0.2439     | 0.2869     | 0.5481     | 7.260                  | -16.3   | -6.5         | -25.6      | +13.4     | -35.0  | 2                   |
| [5]  | 2_655_02 | 0.8066     | 0.7131     | 0.4519     | 6.602                  | -20.9   | -6.8         | -19.0      | +12.6     | -34.0  | 1                   |
| [6]  | 3_665_02 | 0.1934     | 0.7869     | -0.0481    | 7.785                  | -18.3   | -9.1         | -29.4      | +26.2     | -30.6  | 1                   |
| [7]  | 4_565_01 | 0.1934     | 0.7008     | 0.8688     | 8.689                  | -24.5   | -9.9         | -20.2      | +25.5     | -29.1  | 4                   |
| [8]  | 4_564_01 | 0.7561     | 0.7008     | -0.1312    | 8.689                  | -24.5   | -9.9         | -20.2      | +25.5     | -29.1  | 4                   |
| [9]  | 4_565_02 | 0.7561     | 1.2869     | 0.5481     | 6.970                  | -10.4   | -8.1         | -27.4      | +19.7     | -26.1  | 1                   |
| [10] | 2_755_02 | 0.8066     | 0.7131     | 0.4519     | 4.526                  | -4.2    | -8.5         | -43.8      | +31.4     | -25.0  | 1                   |
| [11] | 1_555_02 | 1.1934     | 0.2131     | 0.0481     | 9.483                  | -27.3   | -12.3        | -14.7      | +32.4     | -21.9  | 3                   |
| [12] | 3_766_02 | 0.8066     | 0.7869     | 0.9519     | 9.671                  | -5.2    | -2.8         | -9.4       | +2.5      | -14.9  | 1                   |
| [13] | 1_565_02 | 1.1934     | 1.2131     | 0.0481     | 7.819                  | -1.6    | -6.9         | -17.9      | +12.3     | -14.1  | 1                   |
| [14] | 2_665_02 | 0.1934     | 1.7131     | 0.4519     | 13.496                 | +5.6    | -0.2         | -0.1       | 0.0       | +5.3   | 2                   |
| [15] | 3_676_01 | 0.8066     | 1.2008     | 0.6312     | 9.556                  | +20.0   | -2.3         | -2.0       | 0.0       | +15.7  | 9                   |

## The extensive solid-form landscape of sulfathiazole: geometrical similarity and interaction energies

David S. Hughes, Ann L. Bingham, Michael B. Hursthouse, Terry L. Threlfall and Andrew D. Bond

### S9. Pairwise PIXEL energies ( $\text{kJ mol}^{-1}$ ) derived from the DFT-minimised polymorphs, listing $|E(\text{total})| > 5 \text{ kJ mol}^{-1}$

[Centroid-centroid distances (Å) are geometric (not mass-weighted), and calculated using all atoms in the molecule (including H).

Frequency refers to no. of structures (out of 96) in which the pair is identified using the “Crystal Packing Feature” search in Mercury, tol: 30%, 30°]

#### Polymorph 1 (P2<sub>1</sub>/c, Z' = 2)

Molecule 2, ARU: 1\_555\_02, centroid: 0.8066, 0.2131, 0.0481

Symmetry operators: [1] x,y,z; [2] -x,1/2+y,1/2-z; [3] -x,-y,-z; [4] x,1/2-y,1/2+z

|      | ARU      | Centroid x | Centroid y | Centroid z | Cent-cent distance (Å) | Coulomb | Polarisation | Dispersion | Repulsion | Total  | Frequency (Mercury) |
|------|----------|------------|------------|------------|------------------------|---------|--------------|------------|-----------|--------|---------------------|
| [1]  | 3_755_02 | 1.1934     | -0.2131    | -0.0481    | 7.339                  | -174.9  | -98.7        | -53.8      | +190.6    | -136.7 | 42                  |
| [2]  | 4_554_01 | 0.7561     | -0.2992    | -0.1312    | 7.260                  | -16.3   | -6.5         | -25.6      | +13.4     | -35.0  | 2                   |
| [3]  | 2_645_01 | 0.2439     | 0.2992     | 0.1312     | 6.602                  | -20.9   | -6.8         | -19.0      | +12.6     | -34.0  | 1                   |
| [4]  | 3_665_01 | 0.2439     | 0.2008     | -0.3688    | 7.785                  | -18.3   | -9.1         | -29.4      | +26.2     | -30.6  | 1                   |
| [5]  | 2_745_02 | 1.1934     | -0.2869    | 0.4519     | 9.453                  | -24.2   | -11.0        | -15.7      | +20.2     | -30.6  | 5                   |
| [6]  | 2_755_02 | 1.1934     | 0.7131     | 0.4519     | 9.453                  | -24.2   | -11.0        | -15.7      | +20.2     | -30.6  | 5                   |
| [7]  | 4_564_01 | 0.7561     | 0.7008     | -0.1312    | 6.970                  | -10.4   | -8.1         | -27.4      | +19.7     | -26.1  | 1                   |
| [8]  | 2_745_01 | 1.2439     | 0.2992     | 0.1312     | 4.526                  | -4.2    | -8.5         | -43.8      | +31.4     | -25.0  | 1                   |
| [9]  | 1_555_01 | 0.7561     | 0.7992     | 0.3688     | 9.483                  | -27.3   | -12.3        | -14.7      | +32.4     | -21.9  | 3                   |
| [10] | 3_655_02 | 0.1934     | -0.2131    | -0.0481    | 8.267                  | -11.1   | -4.7         | -8.4       | +3.2      | -21.0  | 13                  |
| [11] | 3_766_01 | 1.2439     | 0.2008     | 0.6312     | 9.671                  | -5.2    | -2.8         | -9.4       | +2.5      | -14.9  | 2                   |
| [12] | 1_545_01 | 0.7561     | -0.2008    | 0.3688     | 7.819                  | -1.6    | -6.9         | -17.9      | +12.3     | -14.1  | 1                   |
| [13] | 4_555_02 | 0.8066     | 0.2869     | 0.5481     | 8.648                  | -4.8    | -5.8         | -14.8      | +17.3     | -8.1   | 5                   |
| [14] | 4_554_02 | 0.8066     | 0.2869     | -0.4519    | 8.648                  | -4.8    | -5.8         | -14.8      | +17.3     | -8.1   | 5                   |
| [15] | 2_635_01 | 0.2439     | -0.7008    | 0.1312     | 13.496                 | +5.6    | -0.2         | -0.1       | 0.0       | +5.3   | 2                   |

## The extensive solid-form landscape of sulfathiazole: geometrical similarity and interaction energies

David S. Hughes, Ann L. Bingham, Michael B. Hursthouse, Terry L. Threlfall and Andrew D. Bond

### S9. Pairwise PIXEL energies ( $\text{kJ mol}^{-1}$ ) derived from the DFT-minimised polymorphs, listing $|E(\text{total})| > 5 \text{ kJ mol}^{-1}$

[Centroid-centroid distances ( $\text{\AA}$ ) are geometric (not mass-weighted), and calculated using all atoms in the molecule (including H).

Frequency refers to no. of structures (out of 96) in which the pair is identified using the “Crystal Packing Feature” search in Mercury, tol: 30%, 30°]

#### Polymorph 2 (P2<sub>1</sub>/n, Z' = 2)

Molecule 1, ARU: 1\_555\_01, centroid: 0.7461, 0.4793, 0.6110

Symmetry operators: [1] x, y, z; [2] 1/2-x, 1/2+y, 1/2-z; [3] -x,-y,-z; [4] 1/2+x, 1/2-y, 1/2+z

|      | ARU      | Centroid x | Centroid y | Centroid z | Cent-cent distance ( $\text{\AA}$ ) | Coulomb | Polarisation | Dispersion | Repulsion | Total | Frequency (Mercury) |
|------|----------|------------|------------|------------|-------------------------------------|---------|--------------|------------|-----------|-------|---------------------|
| [1]  | 1_655_02 | 1.2234     | 0.4496     | 0.8943     | 6.353                               | -54.8   | -31.9        | -33.6      | +64.3     | -56.1 | 1                   |
| [2]  | 3_666_01 | 0.2539     | 0.5207     | 0.3890     | 5.996                               | -22.7   | -10.3        | -52.1      | +34.7     | -50.4 | 9                   |
| [3]  | 1_555_02 | 0.2234     | 0.4496     | 0.8943     | 6.859                               | -37.2   | -21.4        | -17.8      | +35.2     | -41.2 | 1                   |
| [4]  | 3_766_01 | 1.2539     | 0.5207     | 0.3890     | 6.247                               | -26.0   | -13.8        | -38.3      | +37.8     | -40.2 | 6                   |
| [5]  | 2_656_01 | 0.7539     | 0.9793     | 0.8890     | 8.544                               | -44.4   | -25.8        | -28.8      | +59.3     | -39.7 | 1                   |
| [6]  | 2_646_01 | 0.7539     | -0.0207    | 0.8890     | 8.544                               | -44.4   | -25.8        | -28.8      | +59.3     | -39.7 | 1                   |
| [7]  | 2_646_02 | 1.2766     | -0.0504    | 0.6057     | 9.732                               | -38.8   | -13.5        | -16.8      | +29.5     | -39.5 | 15                  |
| [8]  | 2_656_02 | 1.2766     | 0.9496     | 0.6057     | 9.005                               | -25.7   | -13.4        | -21.0      | +27.8     | -32.4 | 5                   |
| [9]  | 3_666_02 | 0.7766     | 0.5504     | 0.1057     | 7.310                               | -9.2    | -5.7         | -16.2      | +9.0      | -22.2 | 1                   |
| [10] | 3_667_02 | 0.7766     | 0.5504     | 1.1057     | 7.145                               | -10.3   | -5.7         | -17.5      | +14.2     | -19.4 | 1                   |
| [11] | 2_556_02 | 0.2766     | 0.9496     | 0.6057     | 8.629                               | -4.7    | -4.4         | -11.9      | +7.8      | -13.2 | 2                   |
| [12] | 4_554_02 | 0.7234     | 0.0504     | 0.3943     | 7.192                               | -0.3    | -2.8         | -15.2      | +7.2      | -11.1 | 1                   |
| [13] | 4_464_01 | 0.2461     | 1.0207     | 0.1110     | 11.981                              | -5.9    | -1.2         | -1.4       | 0.0       | -8.5  | 5                   |
| [14] | 4_565_01 | 1.2461     | 1.0207     | 1.1110     | 11.981                              | -5.9    | -1.2         | -1.4       | 0.0       | -8.5  | 5                   |
| [15] | 1_655_01 | 1.7461     | 0.4793     | 0.6110     | 10.399                              | -4.8    | -0.5         | -0.9       | 0.0       | -6.3  | 1                   |
| [16] | 1_455_01 | -0.2539    | 0.4793     | 0.6110     | 10.399                              | -4.8    | -0.5         | -0.9       | 0.0       | -6.3  | 1                   |
| [17] | 4_664_02 | 1.7234     | 1.0504     | 0.3943     | 13.742                              | -5.8    | -0.2         | -0.2       | 0.0       | -6.3  | 5                   |
| [18] | 4_565_02 | 0.7234     | 1.0504     | 1.3943     | 14.141                              | +5.5    | -0.1         | -0.1       | 0.0       | +5.3  | 3                   |

## The extensive solid-form landscape of sulfathiazole: geometrical similarity and interaction energies

David S. Hughes, Ann L. Bingham, Michael B. Hursthouse, Terry L. Threlfall and Andrew D. Bond

### S9. Pairwise PIXEL energies ( $\text{kJ mol}^{-1}$ ) derived from the DFT-minimised polymorphs, listing $|E(\text{total})| > 5 \text{ kJ mol}^{-1}$

[Centroid-centroid distances (Å) are geometric (not mass-weighted), and calculated using all atoms in the molecule (including H).

Frequency refers to no. of structures (out of 96) in which the pair is identified using the “Crystal Packing Feature” search in Mercury, tol: 30%, 30°]

#### Polymorph 2 (P2<sub>1</sub>/n, Z' = 2)

Molecule 2, ARU: 1\_555\_02, centroid: 0.2234, 0.4496, 0.8943

Symmetry operators: [1] x, y, z; [2] 1/2-x, 1/2+y, 1/2-z; [3] -x, -y, -z; [4] 1/2+x, 1/2-y, 1/2+z

|      | ARU      | Centroid x | Centroid y | Centroid z | Cent-cent distance (Å) | Coulomb | Polarisation | Dispersion | Repulsion | Total | Frequency (Mercury) |
|------|----------|------------|------------|------------|------------------------|---------|--------------|------------|-----------|-------|---------------------|
| [1]  | 1_455_01 | -0.2539    | 0.4793     | 0.6110     | 6.353                  | -54.8   | -31.9        | -33.6      | +64.3     | -56.1 | 1                   |
| [2]  | 3_567_02 | -0.2234    | 0.5504     | 1.1057     | 5.797                  | -23.5   | -11.5        | -52.7      | +39.5     | -48.2 | 17                  |
| [3]  | 2_556_02 | 0.2766     | 0.9496     | 0.6057     | 8.640                  | -37.8   | -15.7        | -24.8      | +31.8     | -46.4 | 2                   |
| [4]  | 2_546_02 | 0.2766     | -0.0504    | 0.6057     | 8.640                  | -37.8   | -15.7        | -24.8      | +31.8     | -46.4 | 2                   |
| [5]  | 1_555_01 | 0.7461     | 0.4793     | 0.6110     | 6.859                  | -37.2   | -21.4        | -17.8      | +35.2     | -41.2 | 1                   |
| [6]  | 2_656_01 | 0.7539     | 0.9793     | 0.8890     | 9.732                  | -38.8   | -13.5        | -16.8      | +29.5     | -39.6 | 15                  |
| [7]  | 3_667_02 | 0.7766     | 0.5504     | 1.1057     | 6.618                  | -17.6   | -8.7         | -24.6      | +14.2     | -36.7 | 8                   |
| [8]  | 2_646_01 | 0.7539     | -0.0207    | 0.8890     | 9.005                  | -25.7   | -13.4        | -21.0      | +27.8     | -32.4 | 5                   |
| [9]  | 3_666_01 | 0.2539     | 0.5207     | 0.3890     | 7.310                  | -9.2    | -5.7         | -16.2      | +9.0      | -22.2 | 1                   |
| [10] | 3_667_01 | 0.2539     | 0.5207     | 1.3890     | 7.145                  | -10.3   | -5.7         | -17.5      | +14.2     | -19.4 | 1                   |
| [11] | 2_546_01 | -0.2461    | -0.0207    | 0.8890     | 8.629                  | -4.7    | -4.4         | -11.9      | +7.8      | -13.2 | 2                   |
| [12] | 4_455_01 | 0.2461     | 0.0207     | 1.1110     | 7.192                  | -0.3    | -2.8         | -15.2      | +7.2      | -11.1 | 1                   |
| [13] | 1_655_02 | -0.7766    | 0.4496     | 0.8943     | 10.399                 | -6.8    | -0.5         | -0.7       | 0.0       | -7.9  | 3                   |
| [14] | 1_455_02 | 1.2234     | 0.4496     | 0.8943     | 10.399                 | -6.8    | -0.5         | -0.7       | 0.0       | -7.9  | 3                   |
| [15] | 4_365_01 | -0.7539    | 1.0207     | 1.1110     | 13.742                 | -5.8    | -0.2         | -0.2       | 0.0       | -6.3  | 5                   |
| [16] | 4_465_02 | -0.2766    | 1.0504     | 1.3943     | 12.737                 | -4.6    | -0.6         | -0.6       | 0.0       | -5.8  | 3                   |
| [17] | 4_564_02 | 0.7234     | 1.0504     | 0.3943     | 12.737                 | -4.6    | -0.6         | -0.6       | 0.0       | -5.8  | 3                   |
| [18] | 4_464_01 | 0.2461     | 1.0207     | 0.1110     | 14.141                 | +5.5    | -0.1         | -0.1       | 0.0       | +5.3  | 6                   |

## The extensive solid-form landscape of sulfathiazole: geometrical similarity and interaction energies

David S. Hughes, Ann L. Bingham, Michael B. Hursthouse, Terry L. Threlfall and Andrew D. Bond

### S9. Pairwise PIXEL energies ( $\text{kJ mol}^{-1}$ ) derived from the DFT-minimised polymorphs, listing $|E(\text{total})| > 5 \text{ kJ mol}^{-1}$

[Centroid-centroid distances ( $\text{\AA}$ ) are geometric (not mass-weighted), and calculated using all atoms in the molecule (including H).

Frequency refers to no. of structures (out of 96) in which the pair is identified using the “Crystal Packing Feature” search in Mercury, tol: 30%, 30°]

#### Polymorph 3 (P2<sub>1</sub>/c, Z' = 2)

Molecule 1, [ARU: 1\_555\_01, centroid: 0.7272, 0.2737, 0.9869

Symmetry operators: [1] x,y,z; [2] -x,1/2+y,1/2-z; [3] -x,-y,-z; [4] x,1/2-y,1/2+z

|      | ARU      | Centroid x | Centroid y | Centroid z | Cent-cent distance ( $\text{\AA}$ ) | Coulomb | Polarisation | Dispersion | Repulsion | Total | Frequency (Mercury) |
|------|----------|------------|------------|------------|-------------------------------------|---------|--------------|------------|-----------|-------|---------------------|
| [1]  | 1_555_02 | 0.7807     | 0.7848     | 0.7766     | 5.721                               | -112.1  | -61.5        | -59.7      | +155.9    | -77.5 | 3                   |
| [2]  | 1_545_02 | 0.7807     | -0.2152    | 0.7766     | 5.580                               | -94.3   | -50.8        | -62.8      | +131.9    | -76.1 | 3                   |
| [3]  | 4_555_02 | 0.7807     | -0.2848    | 1.2766     | 6.352                               | -28.0   | -10.8        | -33.2      | +24.1     | -48.0 | 6                   |
| [4]  | 3_767_02 | 1.2193     | 0.2152     | 1.2234     | 7.938                               | -37.5   | -15.7        | -28.1      | +34.9     | -46.3 | 11                  |
| [5]  | 3_667_01 | 0.2728     | 0.7263     | 1.0131     | 8.962                               | -28.5   | -8.1         | -30.4      | +22.6     | -44.5 | 3                   |
| [6]  | 4_565_02 | 0.7807     | 0.7152     | 1.2766     | 5.648                               | -16.5   | -10.7        | -47.6      | +38.0     | -36.8 | 10                  |
| [7]  | 2_646_02 | 0.2193     | 0.2848     | 0.7234     | 8.195                               | -32.4   | -16.3        | -21.6      | +37.2     | -33.2 | 21                  |
| [8]  | 1_565_01 | 0.7272     | 1.2737     | 0.9869     | 8.498                               | -24.6   | -4.6         | -7.5       | +4.9      | -31.9 | 10                  |
| [9]  | 1_545_01 | 0.7272     | -0.7263    | 0.9869     | 8.498                               | -24.6   | -4.6         | -7.5       | +4.9      | -31.9 | 10                  |
| [10] | 4_555_01 | 0.7272     | 0.2263     | 1.4869     | 7.766                               | -15.8   | -4.7         | -13.7      | +7.2      | -26.9 | 3                   |
| [11] | 4_554_01 | 0.7272     | 0.2263     | 0.4869     | 7.766                               | -15.8   | -4.7         | -13.7      | +7.2      | -26.9 | 3                   |
| [12] | 3_757_01 | 1.2728     | -0.2737    | 1.0131     | 10.461                              | -14.0   | -1.9         | -9.1       | +3.1      | -21.8 | 3                   |
| [13] | 3_667_02 | 0.2193     | 0.2152     | 1.2234     | 10.837                              | -4.7    | -1.2         | -5.2       | +1.8      | -9.3  | 8                   |
| [14] | 2_636_02 | 0.2193     | -0.7152    | 0.7234     | 11.738                              | -5.0    | -0.3         | -0.2       | 0.0       | -5.5  | 31                  |

## The extensive solid-form landscape of sulfathiazole: geometrical similarity and interaction energies

David S. Hughes, Ann L. Bingham, Michael B. Hursthouse, Terry L. Threlfall and Andrew D. Bond

### S9. Pairwise PIXEL energies ( $\text{kJ mol}^{-1}$ ) derived from the DFT-minimised polymorphs, listing $|E(\text{total})| > 5 \text{ kJ mol}^{-1}$

[Centroid-centroid distances ( $\text{\AA}$ ) are geometric (not mass-weighted), and calculated using all atoms in the molecule (including H).

Frequency refers to no. of structures (out of 96) in which the pair is identified using the “Crystal Packing Feature” search in Mercury, tol: 30%, 30°]

#### Polymorph 3 (P2<sub>1</sub>/c, Z' = 2)

Molecule 2, ARU: 1\_555\_02, centroid: 0.7807, 0.7848, 0.7766

Symmetry operators: [1] x,y,z; [2] -x,1/2+y,1/2-z; [3] -x,-y,-z; [4] x,1/2-y,1/2+z

|      | ARU      | Centroid x | Centroid y | Centroid z | Cent-cent distance ( $\text{\AA}$ ) | Coulomb | Polarisation | Dispersion | Repulsion | Total | Frequency (Mercury) |
|------|----------|------------|------------|------------|-------------------------------------|---------|--------------|------------|-----------|-------|---------------------|
| [1]  | 1_555_01 | 0.7272     | 0.2737     | 0.9869     | 5.721                               | -112.1  | -61.5        | -59.7      | +155.9    | -77.5 | 3                   |
| [2]  | 1_565_01 | 0.7272     | 1.2737     | 0.9869     | 5.580                               | -94.3   | -50.8        | -62.8      | +131.9    | -76.1 | 3                   |
| [3]  | 4_554_01 | 0.7272     | 0.2263     | 0.4869     | 6.352                               | -28.0   | -10.8        | -33.2      | +24.1     | -48.0 | 6                   |
| [4]  | 3_767_01 | 1.2728     | 0.7263     | 1.0131     | 7.938                               | -37.5   | -15.7        | -28.1      | +34.9     | -46.3 | 11                  |
| [5]  | 4_564_01 | 0.7272     | 1.2263     | 0.4869     | 5.648                               | -16.5   | -10.7        | -47.6      | +38.0     | -36.8 | 10                  |
| [6]  | 2_656_01 | 0.2728     | 0.7737     | 0.5131     | 8.195                               | -32.4   | -16.3        | -21.6      | +37.2     | -33.2 | 21                  |
| [7]  | 1_565_02 | 0.7807     | 1.7848     | 0.7766     | 8.498                               | -24.0   | -4.6         | -8.3       | +5.6      | -31.3 | 10                  |
| [8]  | 1_545_02 | 0.7807     | -0.2152    | 0.7766     | 8.498                               | -24.0   | -4.6         | -8.3       | +5.6      | -31.3 | 10                  |
| [9]  | 4_564_02 | 0.7807     | 0.7152     | 0.2766     | 7.778                               | -12.4   | -3.6         | -12.3      | +6.1      | -22.2 | 3                   |
| [10] | 4_565_02 | 0.7807     | 0.7152     | 1.2766     | 7.778                               | -12.4   | -3.6         | -12.3      | +6.1      | -22.2 | 3                   |
| [11] | 3_777_02 | 1.2193     | 1.2152     | 1.2234     | 8.880                               | -19.0   | -1.3         | -1.9       | 0.0       | -22.2 | 8                   |
| [12] | 2_746_02 | 1.2193     | 0.2848     | 0.7234     | 9.067                               | +0.8    | -6.5         | -19.2      | +8.2      | -16.7 | 3                   |
| [13] | 2_756_02 | 1.2193     | 1.2848     | 0.7234     | 9.067                               | +0.8    | -6.5         | -19.2      | +8.2      | -16.7 | 3                   |
| [14] | 3_667_01 | 0.2728     | 0.7263     | 1.0131     | 10.837                              | -4.7    | -1.2         | -5.2       | +1.8      | -9.3  | 8                   |
| [15] | 2_666_01 | 0.2728     | 1.7737     | 0.5131     | 11.738                              | -5.0    | -0.3         | -0.2       | 0.0       | -5.5  | 31                  |
| [16] | 3_767_02 | 1.2193     | 0.2152     | 1.2234     | 9.428                               | +25.8   | -4.6         | -4.7       | +3.0      | +19.5 | 11                  |

## The extensive solid-form landscape of sulfathiazole: geometrical similarity and interaction energies

David S. Hughes, Ann L. Bingham, Michael B. Hursthouse, Terry L. Threlfall and Andrew D. Bond

### S9. Pairwise PIXEL energies ( $\text{kJ mol}^{-1}$ ) derived from the DFT-minimised polymorphs, listing $|E(\text{total})| > 5 \text{ kJ mol}^{-1}$

[Centroid-centroid distances (Å) are geometric (not mass-weighted), and calculated using all atoms in the molecule (including H).

Frequency refers to no. of structures (out of 96) in which the pair is identified using the “Crystal Packing Feature” search in Mercury, tol: 30%, 30°]

#### Polymorph 4 (P2<sub>1</sub>/c, Z' = 1)

ARU: 1\_555\_01, centroid: 0.0515, 0.7261, 0.3686

Symmetry operators: [1] x,y,z; [2] -x,1/2+y,1/2-z; [3] -x,-y,-z; [4] x,1/2-y,1/2+z

|      | ARU      | Centroid x | Centroid y | Centroid z | Cent-cent distance (Å) | Coulomb | Polarisation | Dispersion | Repulsion | Total | Frequency (Mercury) |
|------|----------|------------|------------|------------|------------------------|---------|--------------|------------|-----------|-------|---------------------|
| [1]  | 2_555_01 | -0.0515    | 1.2261     | 0.1314     | 5.649                  | -105.2  | -56.7        | -60.0      | +144.3    | -77.6 | 3                   |
| [2]  | 2_545_01 | -0.0515    | 0.2261     | 0.1314     | 5.649                  | -105.2  | -56.7        | -60.0      | +144.3    | -77.5 | 3                   |
| [3]  | 3_576_01 | -0.0515    | 1.2739     | 0.6314     | 6.287                  | -28.9   | -11.2        | -35.5      | +26.9     | -48.7 | 6                   |
| [4]  | 3_666_01 | 0.9485     | 0.2739     | 0.6314     | 9.011                  | -27.1   | -7.8         | -28.3      | +19.5     | -43.7 | 3                   |
| [5]  | 3_566_01 | -0.0515    | 0.2739     | 0.6314     | 5.706                  | -13.8   | -8.7         | -43.7      | +30.2     | -35.9 | 14                  |
| [6]  | 1_655_01 | 1.0515     | 0.7261     | 0.3686     | 8.193                  | -35.0   | -17.7        | -22.3      | +40.7     | -34.4 | 25                  |
| [7]  | 1_455_01 | -0.9485    | 0.7261     | 0.3686     | 8.193                  | -35.0   | -17.7        | -22.3      | +40.7     | -34.4 | 25                  |
| [8]  | 1_565_01 | 0.0515     | 1.7261     | 0.3686     | 8.538                  | -23.0   | -4.1         | -7.0       | +4.0      | -30.1 | 11                  |
| [9]  | 1_545_01 | 0.0515     | -0.2739    | 0.3686     | 8.538                  | -23.0   | -4.1         | -7.0       | +4.0      | -30.1 | 11                  |
| [10] | 4_564_01 | 0.0515     | 0.7739     | -0.1314    | 7.729                  | -15.1   | -5.1         | -15.3      | +9.5      | -26.0 | 3                   |
| [11] | 4_565_01 | 0.0515     | 0.7739     | 0.8686     | 7.729                  | -15.1   | -5.1         | -15.3      | +9.5      | -26.0 | 3                   |
| [12] | 4_464_01 | -0.9485    | 0.7739     | -0.1314    | 10.864                 | -4.8    | -1.1         | -4.7       | +1.5      | -9.1  | 6                   |
| [13] | 4_665_01 | 1.0515     | 0.7739     | 0.8686     | 10.864                 | -4.8    | -1.1         | -4.7       | +1.5      | -9.1  | 6                   |
| [14] | 1_665_01 | 1.0515     | 1.7261     | 0.3686     | 11.833                 | -5.0    | -0.2         | -0.2       | 0.0       | -5.5  | 33                  |
| [15] | 1_445_01 | -0.9485    | -0.2739    | 0.3686     | 11.833                 | -5.0    | -0.2         | -0.2       | 0.0       | -5.5  | 32                  |



## The extensive solid-form landscape of sulfathiazole: geometrical similarity and interaction energies

David S. Hughes, Ann L. Bingham, Michael B. Hursthouse, Terry L. Threlfall and Andrew D. Bond

### S9. Pairwise PIXEL energies ( $\text{kJ mol}^{-1}$ ) derived from the DFT-minimised polymorphs, listing $|E(\text{total})| > 5 \text{ kJ mol}^{-1}$

[Centroid-centroid distances ( $\text{\AA}$ ) are geometric (not mass-weighted), and calculated using all atoms in the molecule (including H).

Frequency refers to no. of structures (out of 96) in which the pair is identified using the “Crystal Packing Feature” search in Mercury, tol: 30%, 30°]

#### Polymorph 5 ( $P2_1/n$ , $Z' = 1$ )

ARU: 1\_555\_01, centroid: 0.3948, 0.7109, 0.8431

Symmetry operators: [1] x, y, z; [2] 1/2-x, 1/2+y, 1/2-z; [3] -x, -y, -z; [4] 1/2+x, 1/2-y, 1/2+z

|      | ARU      | Centroid x | Centroid y | Centroid z | Cent-cent distance ( $\text{\AA}$ ) | Coulomb | Polarisation | Dispersion | Repulsion | Total | Frequency (Mercury) |
|------|----------|------------|------------|------------|-------------------------------------|---------|--------------|------------|-----------|-------|---------------------|
| [1]  | 2_556_01 | 0.1052     | 1.2109     | 0.6569     | 5.636                               | -93.5   | -50.0        | -61.1      | +132.7    | -72.0 | 3                   |
| [2]  | 2_546_01 | 0.1052     | 0.2109     | 0.6569     | 5.636                               | -93.5   | -50.0        | -61.1      | +132.7    | -72.0 | 3                   |
| [3]  | 3_677_01 | 0.6052     | 1.2891     | 1.1569     | 6.431                               | -27.6   | -10.8        | -32.2      | +23.5     | -47.0 | 6                   |
| [4]  | 4_465_01 | -0.1052    | 0.7891     | 1.3431     | 7.970                               | -37.8   | -16.7        | -28.9      | +37.7     | -45.6 | 7                   |
| [5]  | 4_564_01 | 0.8948     | 0.7891     | 0.3431     | 7.970                               | -37.8   | -16.7        | -28.9      | +37.7     | -45.6 | 5                   |
| [6]  | 3_667_01 | 0.6052     | 0.2891     | 1.1569     | 5.491                               | -23.0   | -15.5        | -55.7      | +58.5     | -35.7 | 10                  |
| [7]  | 1_565_01 | 0.3948     | 1.7109     | 0.8431     | 8.467                               | -23.9   | -4.5         | -8.0       | +5.5      | -30.9 | 9                   |
| [8]  | 1_545_01 | 0.3948     | -0.2891    | 0.8431     | 8.467                               | -23.9   | -4.5         | -8.0       | +5.5      | -30.9 | 9                   |
| [9]  | 4_464_01 | -0.1052    | 0.7891     | 0.3431     | 7.746                               | -12.7   | -3.3         | -11.3      | +4.5      | -22.9 | 3                   |
| [10] | 4_565_01 | 0.8948     | 0.7891     | 1.3431     | 7.746                               | -12.7   | -3.3         | -11.3      | +4.5      | -22.9 | 3                   |
| [11] | 3_666_01 | 0.6052     | 0.2891     | 0.1569     | 8.930                               | -19.2   | -1.3         | -1.9       | 0.0       | -22.4 | 8                   |
| [12] | 3_577_01 | -0.3948    | 1.2891     | 1.1569     | 10.527                              | -14.2   | -2.1         | -9.9       | +3.8      | -22.3 | 3                   |
| [13] | 2_656_01 | 1.1052     | 1.2109     | 0.6569     | 9.050                               | +0.1    | -6.6         | -19.9      | +9.2      | -17.1 | 3                   |
| [14] | 2_646_01 | 1.1052     | 0.2109     | 0.6569     | 9.050                               | +0.1    | -6.6         | -19.9      | +9.2      | -17.1 | 3                   |
| [15] | 3_676_01 | 0.6052     | 1.2891     | 0.1569     | 9.537                               | +25.6   | -4.5         | -4.7       | +3.1      | +19.6 | 11                  |

## S10. Pairwise motifs in the polymorphs and multi-component structures

The range of interaction energies is taken from the *PIXEL* tables in Section S9.

Due to borderline tolerance judgements, frequency values are indicative rather than absolute. Where the same motif in different structures shows a different frequency of occurrence, the **largest** frequency value is shown.

| <b>Motif A (Freq = 42)</b>                                                        | <b>Motif B (Freq = 25)</b>                                                        | <b>Motif C (Freq = 17)</b>                                                                                 |
|-----------------------------------------------------------------------------------|-----------------------------------------------------------------------------------|------------------------------------------------------------------------------------------------------------|
| 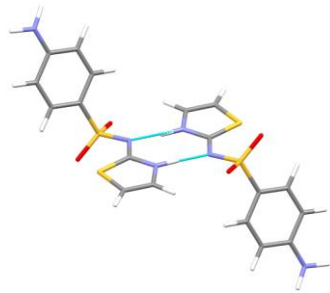 |  |                         |
| 1p:1_555_01:3_776_01<br>1p:1_555_02:3_755_02                                      | 4p:1555_01:1655_01<br>4p:1555_01:1455_01<br>3p:1555_01:2646_02                    | 5p:1555_01:3667_01<br>4p:1555_01:3566_01<br>3p:1555_01:4565_02<br>2p:1555_01:3666_01<br>2p:1555_02:3567_02 |
| $-147.3 \leq E \leq -136.7 \text{ kJ mol}^{-1}$<br>H-bonded = YES                 | $-33.2 \leq E \leq -30.1 \text{ kJ mol}^{-1}$<br>H-bonded = YES                   | $-50.4 \leq E \leq -35.9 \text{ kJ mol}^{-1}$<br>H-bonded = NO                                             |

| <b>Motif D (Freq = 15)</b>                                                          | <b>Motif E (Freq = 11)</b>                                                                                                                                                   | <b>Motif F (Freq = 11)</b>                                                            |
|-------------------------------------------------------------------------------------|------------------------------------------------------------------------------------------------------------------------------------------------------------------------------|---------------------------------------------------------------------------------------|
| 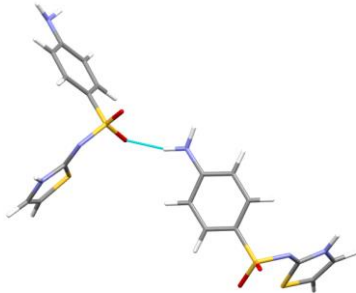 |                                                                                           |  |
| 2p:1555_01:2646_02<br>2p:1555_02:2656_01                                            | 5p:1555_01:1545_01<br>5p:1555_01:1565_01<br>4p:1555_01:1545_01<br>4p:1555_01:1565_01<br>3p:1555_01:1545_01<br>3p:1555_01:1565_01<br>3p:1555_02:1545_02<br>3p:1555_02:1565_02 | 5p:1555_01:3676_01<br>3p:1555_02:3767_02                                              |
| $-39.6 \leq E \leq -39.5 \text{ kJ mol}^{-1}$<br>H-bonded = YES                     | $-31.9 \leq E \leq -30.1 \text{ kJ mol}^{-1}$<br>H-bonded = NO                                                                                                               | $+19.5 \leq E \leq +19.6 \text{ kJ mol}^{-1}$<br>H-bonded = NO                        |

## S10. Pairwise motifs in the polymorphs and multi-component structures

The range of interaction energies is taken from the *PIXEL* tables in Section S9.

Due to borderline tolerance judgements, frequency values are indicative rather than absolute. Where the same motif in different structures shows a different frequency of occurrence, the **largest** frequency value is shown.

| <b>Motif G (Freq = 9)</b>                                                         | <b>Motif H (Freq = 8)</b>                                                         | <b>Motif I (Freq = 8)</b>                                                                                  |
|-----------------------------------------------------------------------------------|-----------------------------------------------------------------------------------|------------------------------------------------------------------------------------------------------------|
| 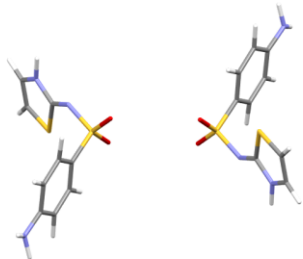 |  |                         |
| 1p:1555_01:3676_01                                                                | 5p:1_555_01:3_666_01<br>3p:1_555_02:3_777_02                                      | 5p:1555_01:3677_01<br>4p:1555_01:3576_01<br>3p:1555_01:4555_02<br>2p:1555_01:3766_01<br>2p:1555_02:3667_02 |
| +15.7 kJ mol <sup>-1</sup><br>H-bonded = NO                                       | -22.4 ≤ E ≤ -22.2 kJ mol <sup>-1</sup><br>H-bonded = NO                           | -48.7 ≤ E ≤ -36.7 kJ mol <sup>-1</sup><br>H-bonded = NO                                                    |

| <b>Motif J (Freq = 6)</b>                                                           | <b>Motif K (Freq = 6)</b>                                                           | <b>Motif L (Freq = 5)</b>                                                             |
|-------------------------------------------------------------------------------------|-------------------------------------------------------------------------------------|---------------------------------------------------------------------------------------|
| 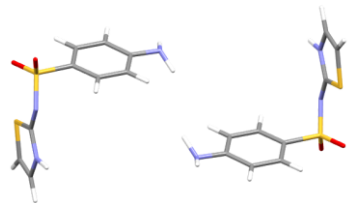 |  |  |
| 5p:1555_01:3567_01<br>3p:1555_01:3767_01                                            | 1p:1555_01:2645_01<br>1p:1555_01:2655_01                                            | 1p:1_555_02:2_745_02<br>1p:1_555_02:2_755_02                                          |
| +1.4 ≤ E ≤ +1.9 kJ mol <sup>-1</sup><br>H-bonded = NO                               | -38.2 kJ mol <sup>-1</sup><br>H-bonded = YES                                        | -30.6 kJ mol <sup>-1</sup><br>H-bonded = YES                                          |

## S10. Pairwise motifs in the polymorphs and multi-component structures

The range of interaction energies is taken from the *PIXEL* tables in Section S9.

Where the same motif in different structures shows a different frequency of occurrence (due to borderline tolerance judgements), the **largest** frequency value is shown.

| <b>Motif M (Freq = 5)</b>                                                         | <b>Motif N (Freq = 3)</b>                                                         | <b>Motif O (Freq = 3)</b>                                                           |
|-----------------------------------------------------------------------------------|-----------------------------------------------------------------------------------|-------------------------------------------------------------------------------------|
| 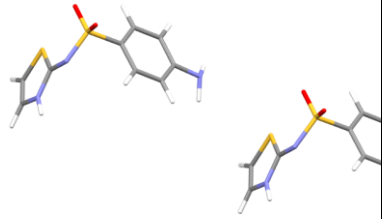 |  |  |
| 5p:1555_01:1655_01<br>5p:1555_01:1455_01<br>3p:1555_01:2746_02                    | 4p:1555_01:3666_01                                                                | 4p:1555_01:3676_01<br>3p:1555_01:3657_01                                            |
| $+4.5 \leq E \leq +4.7 \text{ kJ mol}^{-1}$<br>H-bonded = NO                      | $-43.7 \text{ kJ mol}^{-1}$<br>H-bonded = NO                                      | $+1.1 \leq E \leq +3.2 \text{ kJ mol}^{-1}$<br>H-bonded = NO                        |

| <b>Motif P (Freq = 3)</b>                                                                                                                                                    | <b>Motif Q (Freq = 3)</b>                                                           |  |
|------------------------------------------------------------------------------------------------------------------------------------------------------------------------------|-------------------------------------------------------------------------------------|--|
| 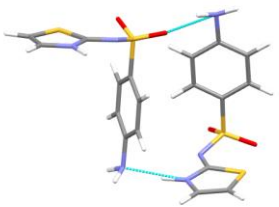                                                                                          |  |  |
| 5p:1555_01:2546_01<br>5p:1555_01:2556_01<br>4p:1555_01:2545_01<br>4p:1555_01:2555_01<br>3p:1555_01:1555_02<br>3p:1555_01:1545_02<br>3p:1555_02:1555_01<br>3p:1555_02:1565_01 | 5p:1555_01:3577_01                                                                  |  |
| $-77.6 \leq E \leq -72.0 \text{ kJ mol}^{-1}$<br>H-bonded = YES                                                                                                              | $-22.3 \text{ kJ mol}^{-1}$<br>H-bonded = NO                                        |  |
